# Supplementary material
Source: PubMed Central journal article supplement (PMC6669790)
Supplement: jamapsychiatry-76-1052-s001.pdf [file jamapsychiatry-76-1052-s001.pdf]

## Supplementary Online Content

Masuda T, Misawa F, Takase M, Kane JM, Correll CU. Association with hospitalization and all-cause discontinuation among patients with schizophrenia on clozapine vs other oral second-generation antipsychotics: a systematic review and meta-analysis of cohort studies. *JAMA Psychiatry*. Published online July 31, 2019. doi:10.1001/jamapsychiatry.2019.1702

**eTable 1.** Newcastle-Ottawa Quality Assessment Scale of Studies With Co-Primary Outcomes

**eTable 2.** Results of Secondary Outcomes Using Different Types of Pre/Post Coefficients

**eTable 3.** Study and Patient Characteristics With Analyzed Outcomes

**eTable 4.** Sensitivity Analyses of Co-Primary Outcomes Removing Studies With Unequal Observation Periods for Comparing Clozapine With Specific Non-Clozapine SGAs

**eTable 5.** Subgroup Analyses for Co-Primary Outcomes

**eTable 6.** Results of Meta-Regression Analyses for Co-Primary Outcomes

**eFigure 1.** PRISMA Diagram of the Systematic Literature Search

**eFigure 2.** Funnel Plots for Co-Primary Outcomes

**eFigure 3.** Forest Plots of Detailed Analyses of Co-Primary Outcomes

**eFigure 4.** Forest Plots of Analyses of Secondary Outcomes

This supplementary material has been provided by the authors to give readers additional information about their work.

## Online-Only Supplements

- ◆ eTable 1. Newcastle-Ottawa Quality Assessment Scale of studies with co-primary outcomes
- ◆ eTable 2. Results of secondary outcomes using different types of pre/post coefficients
  - eTable 2-1. Results of secondary outcomes related to effectiveness using different types of pre/post coefficient
  - eTable 2-2. Results of secondary outcomes related to safety using different types of pre/post coefficient
- ◆ eTable 3. Study and patient characteristics with analyzed outcomes
- ◆ eTable 4. Sensitivity analyses of co-primary outcomes removing studies with unequal observation periods for comparing clozapine with specific non-clozapine SGAs
- ◆ eTable 5. Subgroup analyses for co-primary outcomes
  - eTable 5-1. Results of subgroup analyses for hospitalization
  - eTable 5-2. Results of subgroup analyses for all-cause discontinuation
- ◆ eTable 6. Results of meta-regression analyses for co-primary outcomes
  
- ◆ eFigure 1. PRISMA Diagram of the Systematic Literature Search
- ◆ eFigure 2. Funnel plots for co-primary outcomes
  - eFigure 2-1. Funnel plot for hospitalization
  - eFigure 2-2. Funnel plot for all cause discontinuation
- ◆ eFigure 3. Forest plots of detailed analyses of co-primary outcomes
  - eFigure 3-1. Forest plot of risk ratio for hospitalization (clozapine vs risperidone)
  - eFigure 3-2. Forest plot of risk ratio for hospitalization (clozapine vs olanzapine)
  - eFigure 3-3. Forest plot of risk ratio for hospitalization (clozapine vs quetiapine)
  - eFigure 3-4. Forest plot of risk ratio for hospitalization (clozapine vs aripiprazole)
  - eFigure 3-5. Forest plot of risk ratio for hospitalization (clozapine vs amisulpride)
  - eFigure 3-6. Forest plot of risk ratio for hospitalization (at 6 months)
  - eFigure 3-7. Forest plot of risk ratio for hospitalization (at 12 months)
  - eFigure 3-8. Forest plot of risk ratio for hospitalization (at 24 months)
  - eFigure 3-9. Forest plot of risk ratio for hospitalization (adjusted for follow-up duration)
  - eFigure 3-10. Forest plot of hazard ratio for hospitalization
  - eFigure 3-11. Forest plot of adjusted odds ratio for hospitalization
  - eFigure 3-12. Forest plot of risk ratio for all-cause discontinuation (clozapine vs risperidone)
  - eFigure 3-13. Forest plot of risk ratio for all-cause discontinuation (clozapine vs olanzapine)
  - eFigure 3-14. Forest plot of risk ratio for all-cause discontinuation (clozapine vs quetiapine)
  - eFigure 3-15. Forest plot of risk ratio for all-cause discontinuation (clozapine vs aripiprazole)
  - eFigure 3-16. Forest plot of risk ratio for all-cause discontinuation (clozapine vs amisulpride)
  - eFigure 3-17. Forest plot of risk ratio for all-cause discontinuation (at 6 months)
  - eFigure 3-18. Forest plot of risk ratio for all-cause discontinuation (at 12 months)
  - eFigure 3-19. Forest plot of risk ratio for all-cause discontinuation (at 24 months)

- eFigure 3-20. Forest plot of risk ratio for all-cause discontinuation (at 36 months)
- eFigure 3-21. Forest plot of risk ratio for all-cause discontinuation (adjusted for follow-up duration)
- eFigure 3-22. Forest plot of hazard ratio for all-cause discontinuation
- eFigure 3-23. Forest plot of adjusted odds ratio for all-cause discontinuation
- ◆ eFigure 4. Forest plots of analyses of secondary outcomes
  - eFigure 4-1. Forest plot of standardized mean difference for overall symptoms
  - eFigure 4-2. Forest plot of standardized mean difference for positive symptoms
  - eFigure 4-3. Forest plot of standardized mean difference for negative symptoms
  - eFigure 4-4. Forest plot of standardized mean difference for general symptoms
  - eFigure 4-5. Forest plot of standardized mean difference for depressive symptoms
  - eFigure 4-6. Forest plot of standardized mean difference for cognitive symptoms
  - eFigure 4-7. Forest plot of standardized mean difference for clinical global impressions
  - eFigure 4-8. Forest plot of rate ratio for frequency of hospitalization
  - eFigure 4-9. Forest plot of standardized mean difference for length of hospitalization
  - eFigure 4-10. Forest plot of risk ratio for suicide attempt/self-injurious behavior
  - eFigure 4-11. Forest plot of risk ratio for response
  - eFigure 4-12. Forest plot of risk ratio for death
  - eFigure 4-13. Forest plot of standardized mean difference for EPS score
  - eFigure 4-14. Forest plot of risk ratio for EPS risk/Anticholinergic use
  - eFigure 4-15. Forest plot of risk ratio for weight gain
  - eFigure 4-16. Forest plot of risk ratio for diabetes mellitus
  - eFigure 4-17. Forest plot of risk ratio for metabolic syndrome
  - eFigure 4-18. Forest plot of standardized mean difference for body weight
  - eFigure 4-19. Forest plot of standardized mean difference for body mass index
  - eFigure 4-20. Forest plot of standardized mean difference for waist circumference
  - eFigure 4-21. Forest plot of standardized mean difference for blood pressure (diastolic)
  - eFigure 4-22. Forest plot of standardized mean difference for blood pressure (systolic)
  - eFigure 4-23. Forest plot of standardized mean difference for glucose
  - eFigure 4-24. Forest plot of standardized mean difference for total cholesterol
  - eFigure 4-25. Forest plot of standardized mean difference for triglycerides
  - eFigure 4-26. Forest plot of standardized mean difference for insulin
  - eFigure 4-27. Forest plot of standardized mean difference for HOMA-IR
- ◆ eReference list

**eTable 1. Newcastle-Ottawa Quality Assessment Scale of studies with co-primary outcomes**

| Study                     | Selection                                |                                     |                           |                                                                          | Comparability                                                   | Outcome               |                                                 |                                  | Total score   |
|---------------------------|------------------------------------------|-------------------------------------|---------------------------|--------------------------------------------------------------------------|-----------------------------------------------------------------|-----------------------|-------------------------------------------------|----------------------------------|---------------|
|                           | 1                                        | 2                                   | 3                         | 4                                                                        | 1                                                               | 1                     | 2                                               | 3                                |               |
|                           | Representativeness of the exposed cohort | Selection of the non-exposed cohort | Ascertainment of exposure | Demonstration that outcome of interest was not present at start of study | Comparability of cohorts on the basis of the design or analysis | Assessment of outcome | Was follow-up long enough for outcomes to occur | Adequacy of follow up of cohorts |               |
| Ascher-Svanum et al. 2008 | 1                                        | 1                                   | 1                         | 1                                                                        | 0                                                               | 1                     | 1                                               | 1                                | 7             |
| Bitter et al. 2013        | 1                                        | 1                                   | 1                         | 1                                                                        | 0                                                               | 1                     | 1                                               | 1                                | 7             |
| Buoli et al. 2016         | 1                                        | 1                                   | 1                         | 1                                                                        | 0                                                               | 1                     | 1                                               | 1                                | 7             |
| Castro et al. 2007        | 0                                        | 1                                   | 1                         | 1                                                                        | 0                                                               | 1                     | 1                                               | 0                                | 5             |
| Conley et al. 1999        | 0                                        | 1                                   | 1                         | 1                                                                        | 0                                                               | 1                     | 1                                               | 1                                | 6             |
| Conley et al. 2003        | 0                                        | 1                                   | 1                         | 1                                                                        | 0                                                               | 1                     | 1                                               | 0                                | 5             |
| Cooper et al. 2007        | 1                                        | 1                                   | 1                         | 1                                                                        | 0                                                               | 1                     | 1                                               | 1                                | 7             |
| Green et al. 2003         | 0                                        | 1                                   | 1                         | 1                                                                        | 0                                                               | 1                     | 1                                               | 1                                | 6             |
| Guo_Fang et al. 2011      | 1                                        | 1                                   | 1                         | 1                                                                        | 0                                                               | 1                     | 1                                               | 0                                | 6             |
| Haro et al. 2007          | 1                                        | 1                                   | 1                         | 1                                                                        | 0                                                               | 1                     | 1                                               | 1                                | 7             |
| Herceg et al. 2008        | 0                                        | 1                                   | 1                         | 1                                                                        | 0                                                               | 1                     | 1                                               | 1                                | 6             |
| Hodgson et al. 2005       | 1                                        | 1                                   | 1                         | 1                                                                        | 2                                                               | 1                     | 1                                               | 1                                | 9             |
| Karagianis et al. 2009    | 1                                        | 1                                   | 1                         | 1                                                                        | 0                                                               | 1                     | 1                                               | 1                                | 7             |
| Kim et al. 2008           | 0                                        | 1                                   | 1                         | 1                                                                        | 0                                                               | 1                     | 1                                               | 1                                | 6             |
| Lin et al. 2006           | 0                                        | 1                                   | 1                         | 1                                                                        | 0                                                               | 1                     | 1                                               | 1                                | 6             |
| Lindenmayer et al. 1998   | 0                                        | 1                                   | 1                         | 1                                                                        | 0                                                               | 1                     | 1                                               | 1                                | 6             |
| Novick et al. 2012        | 1                                        | 1                                   | 1                         | 1                                                                        | 0                                                               | 1                     | 1                                               | 1                                | 7             |
| Nyakyoma et al. 2010      | 0                                        | 1                                   | 1                         | 1                                                                        | 0                                                               | 1                     | 1                                               | 1                                | 6             |
| Ringback et al. 2014      | 1                                        | 1                                   | 1                         | 1                                                                        | 0                                                               | 1                     | 1                                               | 1/0 (ACD/HOS)                    | 7/6 (ACD/HOS) |
| Sharma et al. 2003        | 0                                        | 1                                   | 1                         | 1                                                                        | 0                                                               | 1                     | 1                                               | 1                                | 6             |
| Stroup et al. 2015        | 0                                        | 1                                   | 1                         | 1                                                                        | 2                                                               | 1                     | 1                                               | 1/0 (ACD/HOS)                    | 8/7 (ACD/HOS) |
| Taylor et al. 2008        | 1                                        | 1                                   | 1                         | 1/0 (ACD/HOS)                                                            | 0                                                               | 1                     | 1                                               | 1                                | 7/6 (ACD/HOS) |
| Tiihonen et al. 2006      | 0                                        | 1                                   | 1                         | 1                                                                        | 0                                                               | 1                     | 1                                               | 1                                | 6             |
| Treuer et al. 2010        | 1                                        | 1                                   | 1                         | 1                                                                        | 0                                                               | 1                     | 1                                               | 1                                | 7             |

|                      |   |   |   |   |   |   |   |   |   |
|----------------------|---|---|---|---|---|---|---|---|---|
| Vanasse et al. 2016  | 1 | 1 | 1 | 1 | 0 | 1 | 1 | 1 | 7 |
| Velligan et al. 2015 | 1 | 1 | 1 | 0 | 0 | 1 | 1 | 1 | 6 |
| Werneck et al. 2011  | 0 | 1 | 1 | 1 | 0 | 1 | 1 | 1 | 6 |
| Williams et al. 2006 | 0 | 1 | 1 | 1 | 0 | 1 | 1 | 1 | 6 |

ACD, all-cause discontinuation, HOS, hospitalization

eTable 2-1. Results of secondary outcomes related to effectiveness using different types of pre/post coefficients

| Outcome                     | pre/post correlation coefficients | Effect size |             |             |              | Heterogeneity      |                  |
|-----------------------------|-----------------------------------|-------------|-------------|-------------|--------------|--------------------|------------------|
|                             |                                   | SMD         | Lower 95%CI | Upper 95%CI | P Value      | I <sup>2</sup> (%) | P Value          |
| Overall symptoms            | High                              | -0.521      | -0.988      | -0.053      | <b>0.029</b> | 91.9               | <b>&lt;0.001</b> |
|                             | Medium                            | -0.302      | -0.572      | -0.032      | <b>0.028</b> | 74.8               | <b>&lt;0.001</b> |
|                             | Low                               | -0.248      | -0.472      | -0.025      | <b>0.029</b> | 62.6               | <b>0.004</b>     |
| Positive symptoms           | High                              | -0.516      | -1.102      | 0.069       | 0.084        | 92.9               | <b>&lt;0.001</b> |
|                             | Medium                            | -0.253      | -0.574      | 0.069       | 0.124        | 76.3               | <b>&lt;0.001</b> |
|                             | Low                               | -0.185      | -0.438      | 0.068       | 0.153        | 61.1               | <b>0.012</b>     |
| Negative symptoms           | High                              | -0.322      | -0.759      | 0.115       | 0.148        | 87.5               | <b>&lt;0.001</b> |
|                             | Medium                            | -0.227      | -0.568      | 0.113       | 0.190        | 79.5               | <b>&lt;0.001</b> |
|                             | Low                               | -0.194      | -0.502      | 0.113       | 0.216        | 74.9               | <b>&lt;0.001</b> |
| General symptoms            | High                              | -0.166      | -0.733      | 0.401       | 0.565        | 81.1               | <b>&lt;0.001</b> |
|                             | Medium                            | -0.050      | -0.351      | 0.251       | 0.746        | 45.4               | 0.120            |
|                             | Low                               | -0.022      | -0.253      | 0.209       | 0.852        | 12.6               | 0.333            |
| Depressive symptoms         | High                              | -0.038      | -0.343      | 0.266       | 0.805        | 77.0               | <b>&lt;0.001</b> |
|                             | Medium                            | -0.008      | -0.178      | 0.163       | 0.931        | 30.9               | 0.181            |
|                             | Low                               | -0.013      | -0.118      | 0.091       | 0.803        | 1.7                | 0.416            |
| Cognitive symptoms          | High                              | -0.354      | -0.635      | -0.074      | <b>0.013</b> | 41.5               | 0.181            |
|                             | Medium                            | -0.124      | -0.235      | -0.014      | <b>0.027</b> | <0.1               | 0.603            |
|                             | Low                               | -0.093      | -0.203      | 0.017       | 0.098        | <0.1               | 0.744            |
| Clinical global impressions | High                              | -2.062      | -3.514      | -0.611      | <b>0.005</b> | 92.0               | <b>&lt;0.001</b> |
|                             | Medium                            | -1.182      | -2.243      | -0.122      | <b>0.029</b> | 87.7               | <b>&lt;0.001</b> |
|                             | Low                               | -0.911      | -1.809      | -0.014      | <b>0.047</b> | 83.8               | <b>&lt;0.001</b> |

Bolded *P* values indicate *P*<0.05; The pre/post correlation coefficients (High=0.9, Medium=0.5, Low=0.1)

CI, confidence interval; SMD, standardized mean difference

eTable 2-2. Results of secondary outcomes related to safety using different types of pre/post coefficients

| Outcome                    | pre/post correlation coefficients | Effect size |             |             |                  | Heterogeneity      |                  | Effect size |             |             |                  | Unit          | Heterogeneity      |                  |
|----------------------------|-----------------------------------|-------------|-------------|-------------|------------------|--------------------|------------------|-------------|-------------|-------------|------------------|---------------|--------------------|------------------|
|                            |                                   | SMD         | Lower 95%CI | Upper 95%CI | P Value          | I <sup>2</sup> (%) | P Value          | MD          | Lower 95%CI | Upper 95%CI | P Value          |               | I <sup>2</sup> (%) | P Value          |
| Waist circumference        | High                              | 0.429       | -0.25       | 1.107       | 0.216            | 86.4               | <b>0.001</b>     | 1.16        | -0.97       | 3.29        | 0.286            | cm            | 88.1               | <b>&lt;0.001</b> |
|                            | Medium                            | 0.272       | -0.042      | 0.586       | 0.090            | 37.7               | 0.201            | 1.21        | -0.78       | 3.20        | 0.234            |               | 51.1               | 0.129            |
|                            | Low                               | 0.237       | -0.014      | 0.488       | 0.064            | 3.4                | 0.355            | 0.83        | -0.52       | 2.17        | 0.228            |               | 14.4               | 0.311            |
| Blood pressure (Systolic)  | High                              | 0.313       | 0.067       | 0.559       | <b>0.013</b>     | 22.8               | 0.274            | 1.98        | 0.45        | 3.50        | <b>0.011</b>     | mmHg          | 15.9               | 0.304            |
|                            | Medium                            | 0.247       | 0.034       | 0.459       | <b>0.023</b>     | <0.1               | 0.372            | 2.22        | 0.15        | 4.28        | <b>0.035</b>     |               | 9.3                | 0.332            |
|                            | Low                               | 0.228       | 0.007       | 0.449       | <b>0.043</b>     | 6.2                | 0.344            | 2.31        | 0.08        | 4.54        | <b>0.042</b>     |               | 6.9                | 0.342            |
| Blood pressure (Diastolic) | High                              | 0.387       | 0.173       | 0.600       | <b>&lt;0.001</b> | <0.1               | 0.616            | 1.71        | 0.05        | 3.37        | <b>0.044</b>     | mmHg          | 63.9               | 0.063            |
|                            | Medium                            | 0.336       | 0.111       | 0.561       | <b>0.003</b>     | 9.0                | 0.333            | 1.92        | 0.03        | 3.81        | <b>0.047</b>     |               | 53.8               | 0.115            |
|                            | Low                               | 0.32        | 0.076       | 0.565       | <b>0.010</b>     | 22.0               | 0.278            | 2.03        | 0.02        | 4.03        | <b>0.048</b>     |               | 50.2               | 0.134            |
| Total cholesterol          | High                              | 0.704       | -0.162      | 1.569       | 0.111            | 92.3               | <b>&lt;0.001</b> | 12.98       | -4.77       | 30.72       | 0.152            | mg/dL         | 87.0               | <b>&lt;0.001</b> |
|                            | Medium                            | 0.297       | -0.186      | 0.781       | 0.228            | 75.3               | 0.007            | 11.06       | -7.66       | 29.78       | 0.247            |               | 72.8               | <b>0.012</b>     |
|                            | Low                               | 0.199       | -0.201      | 0.599       | 0.330            | 64.0               | 0.04             | 9.47        | -9.32       | 28.25       | 0.323            |               | 63.7               | <b>0.041</b>     |
| Glucose                    | High                              | 0.898       | 0.411       | 1.385       | <b>&lt;0.001</b> | 87.4               | <b>&lt;0.001</b> | 9.00        | 5.80        | 12.21       | <b>&lt;0.001</b> | mg/dL         | 64.8               | <b>0.009</b>     |
|                            | Medium                            | 0.486       | 0.230       | 0.743       | <b>&lt;0.001</b> | 55.6               | <b>0.036</b>     | 8.09        | 4.56        | 11.62       | <b>&lt;0.001</b> |               | 32.4               | 0.181            |
|                            | Low                               | 0.377       | 0.168       | 0.586       | <b>&lt;0.001</b> | 35.0               | 0.161            | 7.71        | 3.98        | 11.44       | <b>&lt;0.001</b> |               | 20.1               | 0.276            |
| Insulin                    | High                              | 0.662       | 0.311       | 1.013       | <b>&lt;0.001</b> | 31.9               | 0.230            | 3.09        | 0.49        | 5.70        | <b>0.020</b>     | microU/<br>mL | 49.5               | 0.138            |
|                            | Medium                            | 0.391       | 0.115       | 0.667       | <b>0.005</b>     | <0.1               | 0.409            | 3.50        | -1.04       | 8.04        | 0.131            |               | 36.2               | 0.209            |
|                            | Low                               | 0.317       | 0.041       | 0.592       | <b>0.024</b>     | <0.1               | 0.444            | 3.70        | -1.72       | 9.11        | 0.181            |               | 28.8               | 0.245            |
| HOMA-IR                    | High                              | 0.584       | 0.287       | 0.881       | <b>&lt;0.001</b> | 15.5               | 0.314            | 1.05        | 0.40        | 1.69        | <b>0.001</b>     |               | 21.3               | 0.282            |
|                            | Medium                            | 0.382       | 0.119       | 0.645       | <b>0.004</b>     | <0.1               | 0.493            | 0.99        | 0.01        | 1.96        | <b>0.047</b>     |               | 15.6               | 0.314            |
|                            | Low                               | 0.311       | 0.049       | 0.574       | <b>0.020</b>     | <0.1               | 0.547            | 0.95        | -0.15       | 2.05        | 0.091            |               | 10.9               | 0.338            |
| EPS score                  | High                              | 0.145       | -0.127      | 0.416       | 0.296            | 14.8               | 0.309            |             |             |             |                  |               |                    |                  |
|                            | Medium                            | 0.068       | -0.179      | 0.314       | 0.590            | <0.1               | 0.720            |             |             |             |                  |               |                    |                  |
|                            | Low                               | 0.051       | -0.195      | 0.298       | 0.683            | <0.1               | 0.825            |             |             |             |                  |               |                    |                  |

Bolded *P* values indicate *P*<0.05; The pre/post correlation coefficients (High=0.9, Medium=0.5, Low=0.1)

CI, confidence interval; EPS, extrapyramidal side effects; HOMA-IR, homeostatic model assessment of insulin resistance; MD, mean difference; SMD, standardized mean difference



**eTable 3. Study and patient characteristics with analyzed outcomes**

| Study                                  | Country | Study design /Data source  | Study duration (month)           | Diagnosis                                                                                                               | TRS (yes, no, N.R.) | Patients (n) Total (CLO/NC-SGAs) | Comparator        | Mean age /Illness duration (year) | % Male | Supported by Pharma Company | Co-primary outcomes                | Secondary outcomes         |
|----------------------------------------|---------|----------------------------|----------------------------------|-------------------------------------------------------------------------------------------------------------------------|---------------------|----------------------------------|-------------------|-----------------------------------|--------|-----------------------------|------------------------------------|----------------------------|
| Advokat et al, 2004 <sup>1</sup>       | US.     | Retrospective /Single-site | 3                                | All diagnoses were made by the treating psychiatrist, using the (DSM-III-R).                                            | N.R.                | 100 (7/93)                       | OLZ<br>QTP<br>RIS | 40.6 /N.R.                        | 31.0   | No                          | N.D.                               | Response rate<br>Anti-chol |
| Agid et al, 2007 <sup>2</sup>          | Canada  | Prospective /Single-site   | 6                                | All patients were receiving treatment of a first episode of schizophrenia or schizoaffective disorder (DSM-IV)          | Yes                 | 22 (13/9)                        | OLZ<br>RIS        | 25.7 /N.R.                        | 78.3   | No                          | N.D.                               | Psy (O, P, N), CGI         |
| Ascher-Svanum et al, 2008 <sup>3</sup> | US      | Prospective /Multi-site    | 12                               | All patients were diagnosed with schizophrenia, schizoaffective, or schizophreniform disorders based on DSM-IV criteria | N.R.                | 768 (74/694)                     | OLZ<br>QTP<br>RIS | 42.0 /21.8                        | 57.3   | Yes                         | ACD (main, pyr, RIS, OLZ, QTP, HR) | N.D.                       |
| Bai et al, 2009 <sup>4</sup>           | Taiwan  | Retrospective /Single-site | Mean 45.8 (CLO:56, NC-SGAs:38.8) | Schizophrenia, as diagnosed according to DSM-IV.                                                                        | N.R.                | 567 (231/336)                    | OLZ<br>RIS        | 48.7 /N.R.                        | 65.8   | No                          | N.D.                               | Weight, BMI                |

|                                                |                           |                            |    |                                                                                                                  |                    |                 |                                        |                         |                   |     |                                                                                               |                            |
|------------------------------------------------|---------------------------|----------------------------|----|------------------------------------------------------------------------------------------------------------------|--------------------|-----------------|----------------------------------------|-------------------------|-------------------|-----|-----------------------------------------------------------------------------------------------|----------------------------|
| Bitter et al, (IC-SOHO) 2005 <sup>5</sup>      | 27 Countries <sup>a</sup> | Prospective /Multi-site    | 6  | Clinical diagnosis of schizophrenia (ICD-10 or DSM-IV).                                                          | N.R.               | 4762 (236/4526) | OLZ<br>QTP<br>RIS                      | 35.2 <sup>b</sup> /N.R. | 54.3 <sup>b</sup> | Yes | ACD (6mo)                                                                                     | N.D.                       |
| Bitter et al, (IC-SOHO) 2008 <sup>6</sup>      | 27 Countries <sup>a</sup> | Prospective /Multi-site    | 24 | Diagnosed with schizophrenia according to either ICD-10 or DSM-IV                                                | N.R.               | 4764 (236/4528) | OLZ<br>QTP<br>RIS                      | 35.1 /8.7               | 55.0              | Yes | ACD (24mo, aOR)                                                                               | Anti-cho                   |
| Bitter et al, 2013 <sup>7</sup>                | Hungary                   | Prospective /Data base     | 12 | All patients in Hungary who had at least one record of schizophrenia diagnosis (F20.0-F20.9 according to ICD-10) | N.R.               | 8472 (790/7682) | AMI<br>APZ<br>OLZ<br>QTP<br>RIS<br>ZIP | 48.2 /N.R.              | 39.3              | Yes | ACD (main, 6, 12mo, RIS, OLZ, QTP, APZ, AMI, HR)<br>HOS (main, 12mo, RIS, OLZ, QTP, APZ, AMI) | Death, Suicide-attempt     |
| Bobo et al, 2010 <sup>8</sup>                  | US                        | Retrospective /Single-site | 3  | Patients who met DSM-IV criteria for schizophrenia or schizoaffective disorder.                                  | Partly (SGA:62.9%) | 159 (146/13)    | Melperone                              | 35.8 /13.0              | 71.8              | No  | N.D.                                                                                          | WG-risk, weight, BMI       |
| Buoli et al, 2016 <sup>9</sup>                 | Netherlands and Italy     | Prospective /Multi-site    | 36 | All patients with a diagnosis of schizophrenia according to DSM-IV-TR                                            | N.R.               | 193 (36/157)    | APZ<br>OLZ<br>QTP<br>RIS               | 30.5 /6.3               | 67.4              | No  | ACD (main, 36mo, pyr, RIS, OLZ, QTP, APZ)                                                     | EPS-risk, WG-risk, DM-risk |
| Bushe et al, (SOHO+IC-SOHO) 2012 <sup>10</sup> |                           | Prospective /Multi-site    | 36 | The patients populations consisted of outpatients aged 18 years or older with schizophrenia                      | N.R.               | 3906 (187/3719) | AMI<br>OLZ<br>QTP<br>RIS               | 37.9 /N.R.              | 54.6              | Yes | N.D.                                                                                          | WG risk Weight, BMI        |

|                                      |         |                            |     |                                                        |      |                 |                   |            |      |     |                                      |                                                    |
|--------------------------------------|---------|----------------------------|-----|--------------------------------------------------------|------|-----------------|-------------------|------------|------|-----|--------------------------------------|----------------------------------------------------|
| Castro and Elkis, 2007 <sup>11</sup> | Brazil  | Retrospective /Single-site | 36  | All patients with schizophrenia (ICD-10)               | Yes  | 53 (31/22)      | RIS               | 36.4 /17.2 | 58.5 | No  | HOS (6, 12, 24mo, pyr, RIS)          | N.D.                                               |
| Chitaia et al, 2009 <sup>12</sup>    | Russia  | Prospective /Single-site   | 6   | Most of patients are schizophrenia according to ICD-10 | N.R. | 40 (20/20)      | RIS               | 36.3 /7.3  | 0.0  | No  | N.D.                                 | WG-risk                                            |
| Conley et al, 1999 <sup>13</sup>     | US.     | Prospective /Multi-site    | 24  | Patients had a diagnosis of schizophrenia.             | N.R. | 124 (49/75)     | RIS               | 40.4 /N.R. | 60.5 | No  | HOS (main, 6, 12, 24mo, pyr, RIS)    | N.D.                                               |
| Conley et al, 2003 <sup>14</sup>     | US      | Prospective /Multi-site    | 12  | Patients with a DSM-IV diagnosis of SCZ                | N.R. | 293 (41/252)    | OLZ<br>RIS        | 38.4 /N.R. | 61.0 | No  | HOS (main, 6, 12mo, pyr, RIS, OLZ)   | N.D.                                               |
| Cooper et al, 2007 <sup>15</sup>     | Canada  | Retrospective /Data base   | 12  | Patients diagnosed with schizophrenia (ICD-9).         | N.R. | 6662 (164/6498) | OLZ<br>QTP<br>RIS | N.R. /N.R. | 57.4 | Yes | ACD (main, 12mo, RIS, OLZ, QTP, aOR) | N.D.                                               |
| Danilov, 2010 <sup>16</sup>          | Russia  | Prospective /Unclear       | 2.5 | Patients with schizophrenia                            | N.R. | 403 (106/297)   | OLZ<br>QTP<br>RIS | 34.1 /6.7  | N.R. | No  | N.D.                                 | EPS-risk                                           |
| De Hert et al, 2008 <sup>17</sup>    | Belgium | Prospective /Single-site   | 36  | The first-episode schizophrenia patients               | N.R. | 108 (12/96)     | OLZ<br>QTP<br>RIS | 22.1 /N.R. | 71.6 | No  | N.D.                                 | Mets-risk                                          |
| Flynn et al, 1998 <sup>18</sup>      | Canada  | Prospective /Single site   | 3   | Patients met DSM-IV criteria for schizophrenia         | Yes  | 86 (57/29)      | RIS               | 33.9 /13.3 | 69.8 | No  | N.D.                                 | Psy (O, P, N, G, D, C), CGI Response-rate Anti-cho |

|                                      |        |                            |                                      |                                                                                                                |      |                 |                                 |            |      |     |                                           |                                                         |
|--------------------------------------|--------|----------------------------|--------------------------------------|----------------------------------------------------------------------------------------------------------------|------|-----------------|---------------------------------|------------|------|-----|-------------------------------------------|---------------------------------------------------------|
| Franza et al, 2015 <sup>19</sup>     | Italy  | Prospective /Single-site   | 12                                   | Schizophrenia or schizoaffective disorder (DSM-5 criteria).                                                    | Yes  | 42 (12/30)      | APZ<br>OLZ<br>PAL<br>QTP        | 45.6 /N.R. | 71.4 | No  | N.D.                                      | Psy (O, N, D)                                           |
| Gau et al, 2008 <sup>20</sup>        | Taiwan | Prospective /Data base     | Mean 21.2 (CLO: 24.0, NC-SGAs: 20.9) | Subjects who were diagnosed as new cases of schizophrenia (ICD-9-CM)                                           | No   | 2521 (224/2297) | OLZ<br>QTP<br>RIS<br>ZOT        | 34.6 /1.7  | 52.6 | No  | N.D.                                      | # of Hos, Hos-days, Anti-cho                            |
| Gautam and Meena, 2011 <sup>21</sup> | India  | Prospective /Single-site   | 4                                    | Subjects were cases of schizophrenia diagnosed as per the ICD-10 criteria.                                     | No   | 90 (30/60)      | OLZ<br>RIS                      | N.R. /N.R. | N.R. | No  | N.D.                                      | Mets-risk, Weight, Waist, BP, TG, Glu                   |
| Green et al, 2003 <sup>22</sup>      | US.    | Retrospective /Single-site | 12                                   | Subjects were comorbid for alcohol and/or cannabis use disorder and schizophrenia or schizoaffective disorder. | N.R. | 53 (35/18)      | RIS                             | 42.2 /N.R. | 75.6 | Yes | ACD (main, 12mo, RIS)                     | N.D.                                                    |
| Guo et al, 2011 <sup>23</sup>        | China  | Prospective /Multi-site    | 12                                   | DSM-IV criteria for schizophrenia or schizophreniform disorder                                                 | No   | 802 (177/625)   | APZ<br>OLZ<br>QTP<br>RIS        | 25.9 /1.9  | 55.9 | No  | HOS (Main, 12mo, pyr, RIS, OLZ, QTP, APZ) | N.D.                                                    |
| Gupta et al, 2014 <sup>24</sup>      | India  | Prospective /Multi-site    | 4                                    | They were screened and classified as schizophrenics if they met the ICD-10 diagnostic criteria                 | No   | 180 (30/150)    | AMI<br>APZ<br>OLZ<br>QTP<br>RIS | N.R. /N.R. | N.R. | No  | N.D.                                      | Mets-risk, Weight, Waist, BP, TG, Glu, Insulin, HOMA-IR |

|                                            |                                    |                            |                               |                                                                                                   |      |                    |                          |                 |      |     |                                                               |                           |
|--------------------------------------------|------------------------------------|----------------------------|-------------------------------|---------------------------------------------------------------------------------------------------|------|--------------------|--------------------------|-----------------|------|-----|---------------------------------------------------------------|---------------------------|
| Haro et al, (SOHO) 2005 <sup>25</sup>      | 10 European countries <sup>c</sup> | Prospective /Multi-site    | 6                             | Patients with a clinical diagnosis of schizophrenia                                               | N.R. | 7700 (301/7399)    | AMI<br>OLZ<br>QTP<br>RIS | 40.0 /N.R.      | 58.3 | Yes | ACD (6mo)                                                     | Psy (P, N, D, C)          |
| Haro et al, (SOHO) 2007 <sup>26</sup>      | 10 European countries <sup>c</sup> | Prospective /Multi-site    | 36                            | Patients with a clinical diagnosis of schizophrenia                                               | N.R. | 6909 (274/6635)    | AMI<br>OLZ<br>QTP<br>RIS | 39.6 /N.R.      | 57.3 | Yes | ACD (main, 24, 36mo, pyr, RIS, OLZ, QTP, AMI, HR)<br>HOS (HR) | Suicide-attempt, # of Hos |
| Hennessy et al, 2002 <sup>27</sup>         | US                                 | Retrospective /Data base   | Mean:7.5 (CLO: 12.6, RIS:5.5) | At least two instances of a schizophrenia diagnosis.                                              | N.R. | 30387 (8330/22057) | RIS                      | N.R. /N.R.      | 54.0 | Yes | N.D.                                                          | Death                     |
| Herceg et al, (chronic) 2008 <sup>28</sup> | Croatia                            | Retrospective /Single-site | 24                            | Diagnosis of schizophrenia was established by licensed psychiatrists according to ICD-10, DSM-IV. | N.R. | 167 (60/107)       | OLZ<br>RIS               | median 42 /N.R. | 59.9 | No  | HOS (6, 12, 24mo, RIS, OLZ)                                   | N.D.                      |
| Herceg et al, (acute) 2008 <sup>28</sup>   | Croatia                            | Retrospective /Single-site | 24                            | Diagnosis of schizophrenia was established by licensed psychiatrists according to ICD-10, DSM-IV. | N.R. | 63 (13/50)         | OLZ<br>RIS               | median 31 /N.R. | 58.7 | No  | HOS (6, 12, 24mo, RIS, OLZ)                                   | N.D.                      |
| Hodgson et al, 2005 <sup>29</sup>          | U.K.                               | Retrospective /Data base   | 96                            | Only patients with a diagnosis of schizophrenia/schizoaffective (ICD10)                           | N.R. | 253 (44/209)       | OLZ<br>RIS               | 40.5 /N.R.      | 64.8 | Yes | ACD (main, 6, 12, 24, 36mo, RIS, OLZ, HR)                     | N.D.                      |

|                                      |        |                            |                                      |                                                                                                                                                              |      |               |                                   |            |      |     |                                 |                                     |
|--------------------------------------|--------|----------------------------|--------------------------------------|--------------------------------------------------------------------------------------------------------------------------------------------------------------|------|---------------|-----------------------------------|------------|------|-----|---------------------------------|-------------------------------------|
| Huang et al, 2011 <sup>30</sup>      | Taiwan | Prospective /Single-site   | Mean 49.9 (range 4-120)              | According to the DSM-IV criteria for schizophrenia                                                                                                           | N.R. | 500 (275/225) | OLZ<br>RIS                        | 43.9 /N.R. | 60.2 | No  | N.D.                            | WG-risk                             |
| Innamorati et al, 2013 <sup>31</sup> | Italy  | Retrospective /Single-site | Mean 60.7 (CLO: 64.3, NC-SGAs: 56.4) | Eighty-seven percent of them were diagnosed with schizophrenia (most with paranoid schizophrenia) and 13% with a Psychotic Disorder Not Otherwise Specified. | Yes  | 46 (23/23)    | APZ<br>OLZ<br>QTP<br>RIS<br>etc., | 41.9 /16.9 | 67.4 | No  | N.D.                            | Psy (P, N, G, D)<br>Suicide-attempt |
| Karagianis et al, 2009 <sup>32</sup> | Canada | Prospective /Multi-site    | 12                                   | Schizophrenia, schizoaffective disorder, schizophreniform disorder, or psychosis not otherwise specified, using DSM-IV                                       | N.R. | 929 (19/910)  | OLZ<br>QTP<br>RIS                 | 43.1 /N.R. | 52.9 | Yes | ACD (main, 12mo, RIS, OLZ, QTP) | N.D.                                |
| Karki et al, 2001 <sup>33</sup>      | US.    | Prospective /Single-site   | 6                                    | 78% had a diagnosis of schizophrenia, and 22% had a diagnosis of schizoaffective disorder.                                                                   | Yes  | 150 (50/100)  | OLZ<br>RIS                        | 45.0 /N.R. | 72.0 | No  | N.D.                            | Psy(O)                              |
| Kelly et al, 2003 <sup>34</sup>      | US.    | Retrospective /Single-site | 6                                    | Identified all patients with a DSM-IV                                                                                                                        | N.R. | 107 (10/97)   | RIS<br>OLZ<br>QTP                 | 43.0 /N.R. | 68.4 | Yes | N.D.                            | Weight, T-cho, TG, Glu              |

|                                       |         |                            |     |                                                                                                                                                              |      |                 |     |            |       |     |                                   |                                             |
|---------------------------------------|---------|----------------------------|-----|--------------------------------------------------------------------------------------------------------------------------------------------------------------|------|-----------------|-----|------------|-------|-----|-----------------------------------|---------------------------------------------|
|                                       |         |                            |     | diagnosis of Schizophrenia                                                                                                                                   |      |                 |     |            |       |     |                                   |                                             |
| Kelly et al, 2010 <sup>35</sup>       | US.     | Retrospective /Data base   | 132 | The study population consisted of persons with a DSM-III or DSM-IV diagnosis of schizophrenia, schizoaffective disorder of psychosis not otherwise specified | Yes  | 1686 (1084/602) | RIS | 39.8 /N.R. | 62.8  | Yes | N.D.                              | Death                                       |
| Kim et al, 2008 <sup>36</sup>         | Korea   | Prospective /Multi-site    | 24  | DSM-IV diagnosis of both schizophrenia                                                                                                                       | N.R. | 61 (25/36)      | RIS | 39.5 /11.9 | 100.0 | No  | HOS (main, 6, 12, 24mo, pyr, RIS) | N.D.                                        |
| Konrad et al, 2000 <sup>37</sup>      | Germany | Prospective /Multi-site    | 1.5 | Diagnosis of schizophrenia according to ICD-10                                                                                                               | Yes  | 64 (27/37)      | RIS | N.R. /N.R. | 45.3  | No  | N.D.                              | Psy (O, P, N, G, D)<br>Response-rate<br>EPS |
| Lin et al, 2006 <sup>38</sup>         | Taiwan  | Retrospective /Single-site | 24  | The study's subjects consisted of all the schizophrenic patients                                                                                             | Yes  | 110 (61/49)     | RIS | 43.9 /14.7 | 66.4  | No  | HOS (6, 12, 24mo, pyr, RIS)       | N.D.                                        |
| Lindenmayer et al, 1998 <sup>39</sup> | US.     | Prospective /Multi-site    | 3   | DSM-IV criteria for schizophrenia.                                                                                                                           | Yes  | 35 (21/14)      | RIS | 39.3 /N.R. | 74.3  | No  | ACD (main, RIS)                   | Psy (O, P, N, D, C),<br>CGI                 |

|                                          |                                    |                            |                                      |                                                                                            |      |                 |                                            |                         |                   |     |                                                      |                        |
|------------------------------------------|------------------------------------|----------------------------|--------------------------------------|--------------------------------------------------------------------------------------------|------|-----------------|--------------------------------------------|-------------------------|-------------------|-----|------------------------------------------------------|------------------------|
| Mauri et al, 2008 <sup>40</sup>          | Italy                              | Retrospective /Single-site | 1.5                                  | Subjects diagnosed as being affected by schizophrenia on the basis of the DSM IV criteria, | N.R. | 111 (19/92)     | OLZ QTP RIS                                | 36.6 /10.4              | 73.9              | No  | N.D.                                                 | Psy (O, D) EPS         |
| Nakamura and Nagamine <sup>41</sup> 2018 | Japan                              | Retrospective /Single site | 3                                    | Patients with schizophrenia                                                                | N.R. | 22 (12/10)      | ASE                                        | 41.9 /N.R.              | 73.3              | No  | N.D.                                                 | Weight, TG, Glu        |
| Nikolac et al, 2014 <sup>42</sup>        | Croatia                            | Prospective /Single-site   | 2                                    | Patients with schizophrenia, diagnosed using a structured clinical interview for DSM-IV.   | N.R. | 445 (120/325)   | OLZ RIS                                    | 40.2 /N.R.              | 70.0              | No  | N.D.                                                 | Response-rate          |
| Novick et al, (SOHO) 2010 <sup>43</sup>  | 10 European countries <sup>c</sup> | Prospective /Multi-site    | 36                                   | Patients with a clinical diagnosis of schizophrenia                                        | N.R. | 4357 (169/4188) | AMI OLZ QTP RIS                            | 38.2 /N.R.              | 56.3              | Yes | N.D.                                                 | EPS-risk               |
| Novick et al, (SOHO) 2012 <sup>44</sup>  | 10 European countries <sup>c</sup> | Prospective /Multi-site    | 12                                   | Patients with a clinical diagnosis of schizophrenia                                        | N.R. | 8162 (316/8146) | AMI OLZ QTP RIS                            | 39.9 /N.R.              | 58.3              | Yes | ACD (12mo) HOS (main, 12mo, RIS, OLZ, QTP, AMI, aOR) | Response-rate, Psy (O) |
| Nyakyoma and Morriss, 2010 <sup>45</sup> | UK                                 | Retrospective /Single-site | 24                                   | A diagnosis of either schizophrenia or schizoaffective (ICD-10)                            | Yes  | 160 (126/34)    | AMI OLZ QTP RIS etc. (Majority is NC-SGAs) | 36.4 <sup>d</sup> /N.R. | 77.3 <sup>d</sup> | No  | HOS (6, 12, 24mo, pyr, HR, aOR)                      | N.D.                   |
| Ollendorf et al, 2004 <sup>46</sup>      | US                                 | Retrospective /Data base   | Mean 13.7 (CLO: 12.8, NC-SGAs: 13.8) | A listed diagnosis of schizophrenia (ICD-9-CM )                                            | N.R. | 1826 (35/1791)  | OLZ QTP RIS                                | 39.1 /N.R.              | 48.2              | No  | N.D.                                                 | DM-risk                |



|                                           |             |                            |            |                                                                                     |      |                   |                                 |                         |                   |     |                                                                                     |                         |
|-------------------------------------------|-------------|----------------------------|------------|-------------------------------------------------------------------------------------|------|-------------------|---------------------------------|-------------------------|-------------------|-----|-------------------------------------------------------------------------------------|-------------------------|
| Pridan et al, 2015 <sup>47</sup>          | US          | Retrospective /Single-site | 60         | Schizophrenia (DSM-IV-TR )                                                          | Yes  | 369 (43/326)      | NC- SGAs                        | 67.4 <sup>d</sup> /N.R. | 46.5 <sup>d</sup> | No  | N.D.                                                                                | Death                   |
| Remington and Khramov, 2001 <sup>48</sup> | Canada      | Retrospective /Single-site | 18         | DSM-IV diagnosis of schizophrenia                                                   | N.R. | 30 (15/15)        | RIS                             | 32.6 /10.5              | 60.0              | No  | N.D.                                                                                | CGI, # of Hos, Hos-days |
| Rettenbacher et al, 2007 <sup>49</sup>    | Austria.    | Prospective /Single-site   | 4          | A diagnosis of schizophrenic disorder according to ICD-10                           | N.R. | 31 (14/17)        | AMI                             | 34.9 /N.R.              | 64.5              | No  | N.D.                                                                                | BMI, Insulin, HOMA-IR   |
| Ringback et al, 2014 <sup>50</sup>        | Sweden      | Retrospective /Data base   | 12         | Schizophrenia (F20) or schizoaffective syndromes (F25) according to ICD- 10         | N.R. | 10849 (2112/8737) | APZ<br>OLZ<br>QTP<br>RIS<br>ZIP | 46.8 /N.R.              | 56.2              | No  | ACD (main, 6, 12, 24mo, RIS, OLZ, QTP, APZ)<br>HOS (main, 12mo, RIS, OLZ, QTP, APZ) | N.D.                    |
| Schulte et al, 2016 <sup>51</sup>         | Netherlands | Retrospective /Single-site | Mean 154.8 | Schizophrenia or schizoaffective disorder as recorded in the medical administration | N.R. | 167 (94/73)       | APZ<br>OLZ<br>QTP<br>RIS<br>SER | 39.0 <sup>d</sup> /N.R. | 78.2 <sup>d</sup> | No  | N.D.                                                                                | DM-risk                 |
| Schuster et al, 2012 <sup>52</sup>        | France      | Prospective /Multi-site    | 6          | Patients meet the DSM-IV TR criteria for schizophrenia                              | N.R. | 3629 (39/3590)    | AMI<br>APZ<br>OLZ<br>RIS        | 37.5 <sup>d</sup> /N.R. | 61.3 <sup>d</sup> | Yes | N.D.                                                                                | BMI                     |
| Sharma et al, 2003 <sup>53</sup>          | U.K.        | Prospective /Single-site   | 6          | Chronic schizophrenia (DSM IV)                                                      | Yes  | 48 (20/28)        | OLZ                             | 35.2 /11.3              | 64.6              | Yes | ACD (main, 6mo, OLZ)                                                                | Psy(O, P, N, G)         |

|                                    |        |                            |                                    |                                                                                                                     |      |                  |                          |                         |                   |     |                                                                            |                                                     |
|------------------------------------|--------|----------------------------|------------------------------------|---------------------------------------------------------------------------------------------------------------------|------|------------------|--------------------------|-------------------------|-------------------|-----|----------------------------------------------------------------------------|-----------------------------------------------------|
| Shermock et al, 2001 <sup>54</sup> | US     | Retrospective /Data base   | 12                                 | Schizophrenia diagnosis (ICD-9- CM)                                                                                 | N.R. | 928 (66/862)     | RIS                      | 38.8 /N.R.              | 51.1              | Yes | N.D.                                                                       | # of Hos                                            |
| Stip et al, 1999 <sup>55</sup>     | Canada | Prospective /Single-site   | 6                                  | Diagnosis was made according to the DSM-IV criteria                                                                 | N.R. | 25 (7/18)        | RIS QTP                  | 36.5 /11.8              | 32.0              | No  | N.D.                                                                       | Response-rate                                       |
| Stroup et al, 2016 <sup>56</sup>   | US     | Retrospective /Data base   | 12                                 | Inpatient claim for schizophrenia (ICD-9-CM 295.3) prior to their index date,                                       | Yes  | 4358 (2179/2179) | NC-SGAs                  | 38.9 <sup>d</sup> /N.R. | 51.9 <sup>d</sup> | No  | ACD (main, 12mo)<br>HOS (main, 12mo, pyr)                                  | Death, suicide-attempt, DM-risk                     |
| Strous et al, 2006 <sup>57</sup>   | Israel | Prospective /Multi-site    | 3                                  | The study population consisted of chronic schizophrenia or schizoaffective disorder (as defined by DSM-IV criteria) | N.R. | 131 (55/76)      | OLZ<br>RIS               | 36.7 /12.5              | 58.0              | Yes | N.D.                                                                       | Psy (O, P, N, G, D)<br>Weight, BMI, T-chol, TG, Glu |
| Taylor et al, 2007 <sup>58</sup>   | UK     | Retrospective /Single-site | 36                                 | A diagnosis of schizophrenia or schizoaffective disorder.                                                           | N.R. | 36 (7/29)        | OLZ<br>RIS               | 43.6 /N.R.              | 58.0              | No  | N.D.                                                                       | #of Hos, Hos-days                                   |
| Taylor et al, 2008 <sup>59</sup>   | U.K.   | Retrospective /Data base   | Mean 21.7 (CLO:23.2, NC-SGAs:21.6) | Only those cases with a diagnosis of schizophrenia or related psychoses (F2 category, ICD-10) were selected         | N.R. | 400 (40/360)     | AMI<br>OLZ<br>QTP<br>RIS | 40.4 /N.R.              | 58.8              | No  | ACD (main, pyr, RIS, OLZ, QTP, AMI)<br>HOS (main, pyr, RIS, OLZ, QTP, AMI) | N.D.                                                |

|                                            |                           |                          |                              |                                                                                                                                                   |      |                   |                                 |                         |                   |     |                                                                        |                                            |
|--------------------------------------------|---------------------------|--------------------------|------------------------------|---------------------------------------------------------------------------------------------------------------------------------------------------|------|-------------------|---------------------------------|-------------------------|-------------------|-----|------------------------------------------------------------------------|--------------------------------------------|
| Tiihonen et al, 2006 <sup>60</sup>         | Finland                   | Prospective /Data base   | Mean 9.8 (CLO:17.0, RIS:7.3) | Schizophrenia or schizoaffective disorder (ICD-9, 10/DSM-IV )                                                                                     | N.R. | 587 (150/437)     | OLZ<br>RIS                      | 30.7 <sup>d</sup> /N.R. | 62.0 <sup>d</sup> | No  | ACD (main, pyr, RIS, OLZ)<br>HOS (main, pyr, RIS, OLZ)                 | N.D.                                       |
| Treuer et al, (IC-SOHO) 2010 <sup>61</sup> | 27 countries <sup>a</sup> | Prospective /Multi-site  | 36                           | Subjects who met criteria for schizophrenia (ICD-10 or DSM-IV)                                                                                    | N.R. | 4765 (237/4528)   | OLZ<br>QTP<br>RIS               | 35.1 /8.7               | 55.0              | Yes | ACD (main, 36mo, RIS, OLZ, QTP)                                        | N.D.                                       |
| Tschoner et al, 2009 <sup>62</sup>         | Austria                   | Prospective /Single-site | 1                            | Diagnosed with schizophrenic disorder according to ICD-10                                                                                         | N.R. | 28 (7/21)         | AMI<br>OLZ<br>QTP<br>RIS<br>ZIP | 34.2 /N.R.              | 57.1              | Yes | N.D.                                                                   | BMI, T-chol, TG, HOMA-IR                   |
| van Winkel et al, 2008 <sup>63</sup>       | Belgium                   | Prospective /Single-site | 3                            | Patients were included if they had a DSM-IV diagnosis of schizophrenia or schizoaffective disorder as established by their treating psychiatrist; | N.R. | 183 (21/162)      | AMI<br>APZ<br>OLZ<br>QTP<br>RIS | 33.7 /7.5               | 60.7              | Yes | N.D.                                                                   | DM-risk, BMI, Waist, Glu, Insulin, HOMA-IR |
| Vanasse et al, 2016 <sup>64</sup>          | Canada                    | Retrospective /Data base | 24                           | A prior diagnosis of schizophrenia or schizoaffective disorder (ICD-9: 295)                                                                       | N.R. | 11980 (324/11656) | OLZ<br>QTP<br>RIS               | 44.2 /0.22              | 54.3              | No  | ACD (main, 24mo, RIS, OLZ, QTP, HR)<br>HOS (main, 24mo, RIS, OLZ, QTP) | N.D.                                       |
| Velligan et al, 2015 <sup>65</sup>         | US.                       | Retrospective /Data base | 12                           | At least one diagnosis of schizophrenic disorder (ICD-9-                                                                                          | N.R. | 2919 (479/2440)   | APZ<br>OLZ<br>PAL<br>QTP        | 39.2 /N.R.              | 50.7              | Yes | HOS (main, 12mo, aOR)                                                  | N.D.                                       |

|                                       |        |                               |    | CM code<br>295.XX)                                                                               |      |                 | RIS<br>ZIP                      |                            |                   |     |                                              |                                  |
|---------------------------------------|--------|-------------------------------|----|--------------------------------------------------------------------------------------------------|------|-----------------|---------------------------------|----------------------------|-------------------|-----|----------------------------------------------|----------------------------------|
| Werneck et al,<br>2011 <sup>66</sup>  | Brazil | Retrospective<br>/Single-site | 36 | The diagnosis of<br>schizophrenia<br>based on ICD-<br>10.                                        | N.R. | 172<br>(59/113) | AMI<br>APZ<br>OLZ<br>RIS<br>ZIP | 37.3<br>/16.3              | 61.6              | No  | HOS (main,<br>6, 12 24mo,<br>pyr, RIS)       | N.D.                             |
| Williams et al,<br>2006 <sup>67</sup> | Canada | Prospective<br>/Multi-site    | 24 | Patients<br>diagnosed with<br>schizophrenia<br>and other<br>psychotic<br>disorders (DSM-<br>IV). | N.R. | 217<br>(51/166) | OLZ<br>QTP<br>RIS               | 37.9 <sup>d</sup><br>/N.R. | 68.0 <sup>d</sup> | Yes | HOS (main,<br>12, 24mo,<br>RIS, OLZ,<br>QTP) | N.D.                             |
| Woo et al,<br>2009 <sup>68</sup>      | Korea  | Retrospective<br>/Multi-site  | 2  | All patients with<br>a DSM-IV<br>diagnosis of<br>schizophrenia                                   | N.R. | 167<br>(70/97)  | OLZ                             | 38.7<br>/N.R.              | 52.1              | No  | N.D.                                         | Weight,<br>BP, T-cho,<br>TG, Glu |

For study references, see e-reference list at the end of the supplemental file.

#### Abbreviations:

# of Hos, number of hospitalization; 6mo, at 6month; 12mo, at 12month; 24mo, at 24month; 36mo, at 36month; ACD, all cause discontinuation; AMI, amisulpride; Anti-cho, anticholinergic use; aOR, adjusted odds ratio  
ASE, asenapine; BMI, body mass index; BP, blood pressure; CGI, clinical global impressions; CI, confidence intervals; CLO, clozapine; CM, clinical modification; DM-risk, diabetes mellitus-risk; DSM, the Diagnostic and  
Statistical Manual of Mental Disorders ; EPS, extrapyramidal symptoms; Glu, glucose; Hos days, hospitalization days; HOS, hospitalization risk; HR, hazard ratio; ICD, the International Classification of Diseases; Main,  
main analysis ; NC-SGAs, non-clozapine second-generation antipsychotics; N.D., No data; N.R., Not reported; OLZ, olanzapine; PAL; paliperidone; Psy, psychopathology; Psy(C), cognitive symptom; Psy(D),  
depressive symptom; Psy(G), general symptom; Psy(N), negative symptom; Psy(O), overall symptom; Psy(P), positive symptom; pyr, person years; QTP, quetiapine; RIS, risperidone; SER, sertindole; T-cho, total  
cholesterol; TG, triglycerides; TRS, treatment-resistant schizophrenia; WG risk, weight gain risk; ZIP, ziprasidone; ZOT, zotepine

<sup>a</sup> Africa, the Middle East, Asia, Central and Eastern Europe, and Latin America

<sup>b</sup> Characteristics of the part of analyzed patients

<sup>c</sup>Germany, Italy Spain Denmark, France, Greece, Ireland, the Netherlands, Portugal and the UK

<sup>d</sup>Characteristics including non-analyzed patients

**eTable 4. Sensitivity analyses of co-primary outcomes removing studies with unequal observation periods for comparing clozapine with specific non-clozapine SGAs.**

| Outcome                                                           | Studies (N) | Patients (n) | Effect size |             |             |                  | Heterogeneity      |                  | Effect size      |             |             |
|-------------------------------------------------------------------|-------------|--------------|-------------|-------------|-------------|------------------|--------------------|------------------|------------------|-------------|-------------|
|                                                                   |             |              | Risk Ratio  | Lower 95%CI | Upper 95%CI | P Value          | I <sup>2</sup> (%) | P Value          | NNT <sup>a</sup> | Lower 95%CI | Upper 95%CI |
| <b>Hospitalization (vs specific non-clozapine SGAs)</b>           |             |              |             |             |             |                  |                    |                  |                  |             |             |
| CLO vs RIS                                                        | 14          | 17,228       | 0.842       | 0.720       | 0.984       | <b>0.030</b>     | 60.4               | <b>0.002</b>     | 20               | 12          | 195         |
| CLO vs OLZ                                                        | 9           | 19,803       | 0.914       | 0.732       | 1.142       | 0.429            | 79.2               | <b>&lt;0.001</b> | -                | -           | -           |
| CLO vs QTP                                                        | 6           | 8,062        | 0.686       | 0.535       | 0.880       | <b>0.003</b>     | 81.0               | <b>&lt;0.001</b> | 13               | 9           | 33          |
| CLO vs APZ                                                        | 3           | 4,529        | 0.698       | 0.559       | 0.872       | <b>0.002</b>     | 46.1               | 0.157            | -                | -           | -           |
| CLO vs AMI                                                        | 2           | 2,308        | 0.633       | 0.543       | 0.739       | <b>&lt;0.001</b> | <0.1               | 0.725            | 11               | 8           | 15          |
| <b>All-cause discontinuation (vs specific non-clozapine SGAs)</b> |             |              |             |             |             |                  |                    |                  |                  |             |             |
| CLO vs RIS                                                        | 12          | 20,367       | 0.688       | 0.590       | 0.802       | <b>&lt;0.001</b> | 88.9               | <b>&lt;0.001</b> | 7                | 5           | 10          |
| CLO vs OLZ                                                        | 11          | 26,677       | 0.800       | 0.659       | 0.971       | <b>0.024</b>     | 93.9               | <b>&lt;0.001</b> | 11               | 7           | 72          |
| CLO vs QTP                                                        | 9           | 8,524        | 0.668       | 0.495       | 0.902       | <b>0.009</b>     | 97.2               | <b>&lt;0.001</b> | 6                | 4           | 18          |
| CLO vs APZ                                                        | 3           | 4,070        | 0.712       | 0.338       | 1.501       | 0.372            | 99.0               | <b>&lt;0.001</b> | -                | -           | -           |
| CLO vs AMI                                                        | 2           | 2,240        | 0.792       | 0.598       | 1.049       | 0.104            | 86.0               | <b>0.008</b>     | -                | -           | -           |

Bolded *P* values indicate *P*<0.05; AMI, amisulpride; APZ, aripiprazole; CI, confidence intervals; CLO, clozapine; N, number; NNT, numbers-needed-to-treat; OLZ, olanzapine; RIS, risperidone; QTP, quetiapine; SGA, second-generation antipsychotic

<sup>a</sup> NNTs were only calculated when the risk ratio analysis was significant (*P*<0.05). The mean risk for the non-clozapine SGAs treatment was used as the assumed control group risk.

**eTable 5-1. Results of subgroup analyses for hospitalization**

| Variables                         | Subgroup        | Studies (N) | Patients (n) | Effect size |             |             |                  | Heterogeneity      |                  | Effect size      |             |             | Between subgroup difference |
|-----------------------------------|-----------------|-------------|--------------|-------------|-------------|-------------|------------------|--------------------|------------------|------------------|-------------|-------------|-----------------------------|
|                                   |                 |             |              | Risk Ratio  | Lower 95%CI | Upper 95%CI | P Value          | I <sup>2</sup> (%) | P Value          | NNT <sup>a</sup> | Lower 95%CI | Upper 95%CI |                             |
| Baseline setting                  | Index discharge | 11          | 12,639       | 0.777       | 0.669       | 0.903       | <b>0.001</b>     | 23.9               | 0.216            | 13               | 9           | 28          | <i>P</i> =0.572             |
|                                   | Outpatients     | 6           | 33,495       | 0.883       | 0.727       | 1.073       | 0.210            | 81.2               | <b>&lt;0.001</b> | -                | -           | -           |                             |
|                                   | Unclear         | 2           | 3,319        | 0.919       | 0.408       | 2.069       | 0.838            | 90.9               | <b>0.001</b>     | -                | -           | -           |                             |
| Study design                      | Prospective     | 8           | 18,222       | 0.818       | 0.627       | 1.068       | 0.140            | 69.4               | <b>0.002</b>     | -                | -           | -           | <i>P</i> =0.986             |
|                                   | Retrospective   | 11          | 31,231       | 0.820       | 0.717       | 0.938       | <b>0.004</b>     | 65.9               | <b>0.001</b>     | 16               | 10          | 45          |                             |
| Hospitalization definition        | All cause       | 3           | 804          | 1.089       | 0.883       | 1.343       | 0.426            | <0.1               | 0.469            | -                | -           | -           | <i>P</i> =0.382             |
|                                   | Mental health   | 14          | 48,089       | 0.762       | 0.673       | 0.861       | <b>&lt;0.001</b> | 64.8               | <b>&lt;0.001</b> | 14               | 10          | 28          |                             |
|                                   | Unclear         | 2           | 560          | 0.953       | 0.426       | 2.133       | 0.908            | 82.7               | <b>0.016</b>     | -                | -           | -           |                             |
| Data source                       | Database        | 7           | 39,565       | 0.803       | 0.691       | 0.934       | <b>0.004</b>     | 81.2               | <b>&lt;0.001</b> | 19               | 12          | 57          | <i>P</i> =0.770             |
|                                   | Multi center    | 6           | 9,163        | 0.885       | 0.653       | 1.199       | 0.430            | 47.4               | 0.091            | -                | -           | -           |                             |
|                                   | One site        | 6           | 725          | 0.759       | 0.564       | 1.019       | 0.067            | 49.3               | 0.080            | -                | -           | -           |                             |
| Region                            | Asia            | 3           | 973          | 0.822       | 0.638       | 1.059       | 0.129            | <0.1               | 0.418            | -                | -           | -           | <i>P</i> =0.540             |
|                                   | EU              | 8           | 28,364       | 0.886       | 0.723       | 1.086       | 0.245            | 75.0               | <b>&lt;0.001</b> | -                | -           | -           |                             |
|                                   | Other           | 4           | 12,422       | 0.756       | 0.464       | 1.232       | 0.261            | 72.0               | <b>0.014</b>     | -                | -           | -           |                             |
|                                   | U.S.            | 4           | 7,694        | 0.702       | 0.551       | 0.895       | <b>0.004</b>     | 68.4               | <b>0.023</b>     | 13               | 9           | 36          |                             |
| Supported by company              | No              | 15          | 30,179       | 0.843       | 0.758       | 0.938       | <b>0.002</b>     | 37.0               | 0.074            | 19               | 13          | 48          | <i>P</i> =0.841             |
|                                   | Yes             | 4           | 19,274       | 0.815       | 0.596       | 1.115       | 0.201            | 86.3               | <b>&lt;0.001</b> | -                | -           | -           |                             |
| Treatment Resistant Schizophrenia | No/Not Reported | 15          | 44,772       | 0.836       | 0.718       | 0.973       | <b>0.021</b>     | 72.0               | <b>&lt;0.001</b> | 22               | 13          | 130         | <i>P</i> =0.616             |
|                                   | Yes             | 4           | 4,681        | 0.782       | 0.635       | 0.965       | <b>0.022</b>     | 33.9               | 0.209            | 11               | 7           | 67          |                             |

Bolded *P* values indicate  $P < 0.05$ ; CI, confidence interval; NNT, numbers-needed-to-treat

<sup>a</sup> NNTs were only calculated when the risk ratio analysis was significant ( $P < 0.05$ ). The mean risk for the non-clozapine SGAs treatment was used as the assumed control group risk.



**eTable 5-2. Results of subgroup analyses for all-cause discontinuation**

| Variable                          | Subgroup        | Studies (N) | Patients (N) | Effect size |             |             |                  | Heterogeneity      |                  | Effect size      |             |             | Between subgroup difference |
|-----------------------------------|-----------------|-------------|--------------|-------------|-------------|-------------|------------------|--------------------|------------------|------------------|-------------|-------------|-----------------------------|
|                                   |                 |             |              | Risk Ratio  | Lower 95%CI | Upper 95%CI | P Value          | I <sup>2</sup> (%) | P Value          | NNT <sup>a</sup> | Lower 95%CI | Upper 95%CI |                             |
| Baseline setting                  | Inpatients      | 1           | 587          | 0.853       | 0.766       | 0.950       | <b>0.004</b>     | NA                 | NA               | 9                | 6           | 24          | <b>P&lt;0.001</b>           |
|                                   | Mixed           | 2           | 10,724       | 0.535       | 0.493       | 0.580       | <b>&lt;0.001</b> | <0.1               | 0.587            | 5                | 5           | 6           |                             |
|                                   | Outpatients     | 9           | 44,321       | 0.784       | 0.680       | 0.904       | <b>0.001</b>     | 91.4               | <b>&lt;0.001</b> | 9                | 6           | 20          |                             |
|                                   | Unclear         | 4           | 736          | 0.678       | 0.490       | 0.938       | <b>0.019</b>     | 9.4                | 0.346            | 8                | 6           | 42          |                             |
| Study design                      | Prospective     | 9           | 22,706       | 0.899       | 0.842       | 0.960       | <b>0.001</b>     | 31.1               | 0.169            | 20               | 13          | 49          | <b>P&lt;0.001</b>           |
|                                   | Retrospective   | 7           | 33,662       | 0.600       | 0.504       | 0.714       | <b>&lt;0.001</b> | 87.0               | <b>&lt;0.001</b> | 5                | 4           | 7           |                             |
| Data source                       | Database        | 8           | 42,668       | 0.686       | 0.574       | 0.819       | <b>&lt;0.001</b> | 95.9               | <b>&lt;0.001</b> | 6                | 4           | 10          | P=0.073                     |
|                                   | Multi center    | 6           | 13,599       | 0.873       | 0.752       | 1.013       | 0.074            | 42.3               | 0.123            | -                | -           | -           |                             |
|                                   | One site        | 2           | 101          | 0.294       | 0.045       | 1.910       | 0.200            | 81.5               | <b>0.020</b>     | -                | -           | -           |                             |
| Region                            | EU              | 8           | 26,818       | 0.743       | 0.590       | 0.936       | <b>0.012</b>     | 95.0               | <b>&lt;0.001</b> | 8                | 5           | 29          | P=0.682                     |
|                                   | Other           | 4           | 24,336       | 0.761       | 0.571       | 1.016       | 0.064            | 89.6               | <b>&lt;0.001</b> | -                | -           | -           |                             |
|                                   | U.S.            | 4           | 5,214        | 0.607       | 0.390       | 0.946       | <b>0.028</b>     | 68.6               | <b>0.023</b>     | 6                | 4           | 41          |                             |
| Supported by company              | No              | 7           | 22,706       | 0.692       | 0.584       | 0.820       | <b>&lt;0.001</b> | 89.8               | <b>&lt;0.001</b> | 7                | 5           | 11          | P=0.219                     |
|                                   | Yes             | 9           | 33,662       | 0.795       | 0.690       | 0.916       | <b>0.001</b>     | 74.9               | <b>&lt;0.001</b> | 10               | 7           | 23          |                             |
| Treatment Resistant Schizophrenia | No/Not Reported | 13          | 51,927       | 0.723       | 0.613       | 0.852       | <b>&lt;0.001</b> | 93.4               | <b>&lt;0.001</b> | 7                | 5           | 13          | P=0.954                     |
|                                   | Yes             | 3           | 4,441        | 0.719       | 0.682       | 0.758       | <b>&lt;0.001</b> | <0.1               | 0.543            | 9                | 8           | 11          |                             |

Bolded P values indicate P<0.05; CI, confidence interval; NA, not available; NNT, numbers-needed-to-treat

<sup>a</sup> NNTs were only calculated when the risk ratio analysis was significant (P<0.05). The mean risk for the non-clozapine SGAs treatment was used as the assumed control group risk.

**eTable 6. Results of meta-regression analyses for co-primary outcomes**

| Moderator or Mediator Variable                                | Studies (N) | Results     |             |             |         |
|---------------------------------------------------------------|-------------|-------------|-------------|-------------|---------|
|                                                               |             | Coefficient | Lower 95%CI | Upper 95%CI | P Value |
| <b>Meta-regression analyses for hospitalization</b>           |             |             |             |             |         |
| Male (%)                                                      | 19          | 0.001       | -0.009      | 0.011       | 0.802   |
| Sample size                                                   | 19          | 0.000       | 0.000       | 0.000       | 0.809   |
| Publication year                                              | 19          | -0.006      | -0.037      | 0.026       | 0.721   |
| Mean age                                                      | 18          | -0.007      | -0.032      | 0.017       | 0.551   |
| Illness duration                                              | 6           | -0.028      | -0.058      | 0.003       | 0.080   |
| Study duration                                                | 17          | -0.055      | -0.268      | 0.158       | 0.616   |
| Follow up duration                                            | 11          | -0.129      | -0.505      | 0.248       | 0.504   |
| Study quality                                                 | 19          | 0.090       | -0.148      | 0.328       | 0.458   |
| Baseline illness severity (Hedges' g)*                        | 12          | 0.201       | -0.143      | 0.544       | 0.253   |
| <b>Meta-regression analyses for all-cause discontinuation</b> |             |             |             |             |         |
| Male (%)                                                      | 16          | -0.011      | -0.029      | 0.008       | 0.250   |
| Sample size                                                   | 16          | 0.000       | 0.000       | 0.000       | 0.659   |
| Publication year                                              | 16          | 0.001       | -0.032      | 0.034       | 0.942   |
| Mean age                                                      | 15          | -0.015      | -0.043      | 0.014       | 0.315   |
| Illness duration                                              | 5           | -0.008      | -0.047      | 0.031       | 0.679   |
| Study duration                                                | 14          | 0.011       | -0.076      | 0.097       | 0.811   |
| Follow up duration                                            | 5           | 0.055       | -0.319      | 0.428       | 0.774   |
| Study quality                                                 | 16          | 0.011       | -0.205      | 0.227       | 0.920   |
| Baseline illness severity (Hedges' g)*                        | 8           | -0.284      | -0.792      | 0.224       | 0.274   |

CI, confidence interval

\*We used four types of data (choosing in descending order when multiple data were available): 1) psychopathology score (Positive and Negative Syndrome Scale (PANSS), Brief Psychiatric Rating Scale (BPRS) or Clinical Global Impressions scale (CGI) at baseline, 2) a prior number of hospitalizations, 3) prior hospitalization days, and 4) proportion of hospitalized patients at baseline.

**eFigure 1. PRISMA Diagram of the Systematic Literature Search**

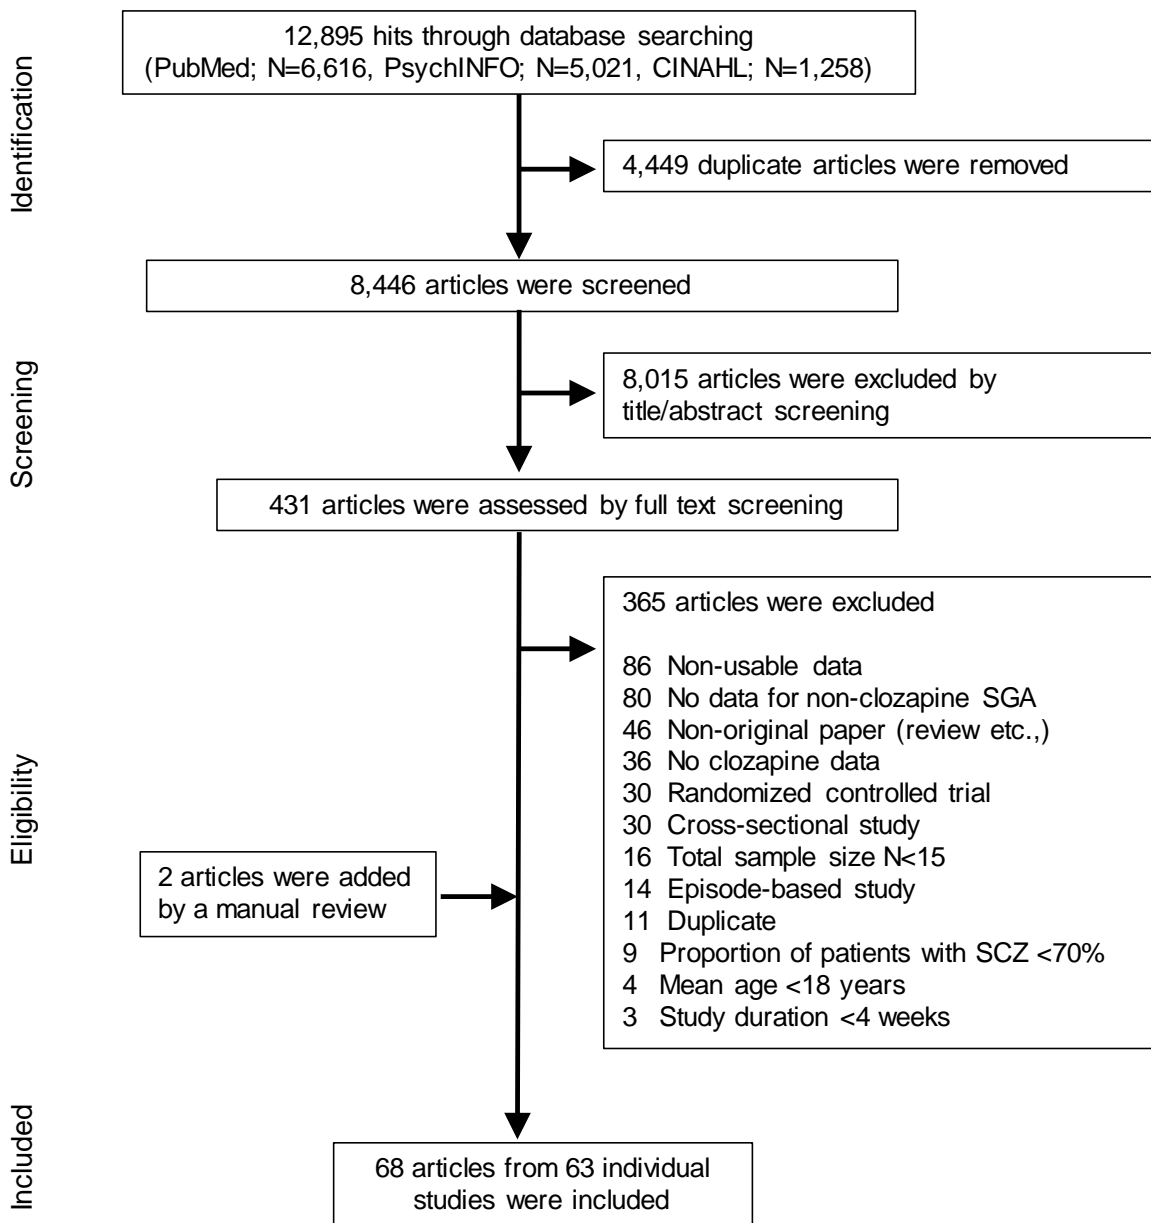

**eFigure 2-1. Funnel plot for hospitalization**

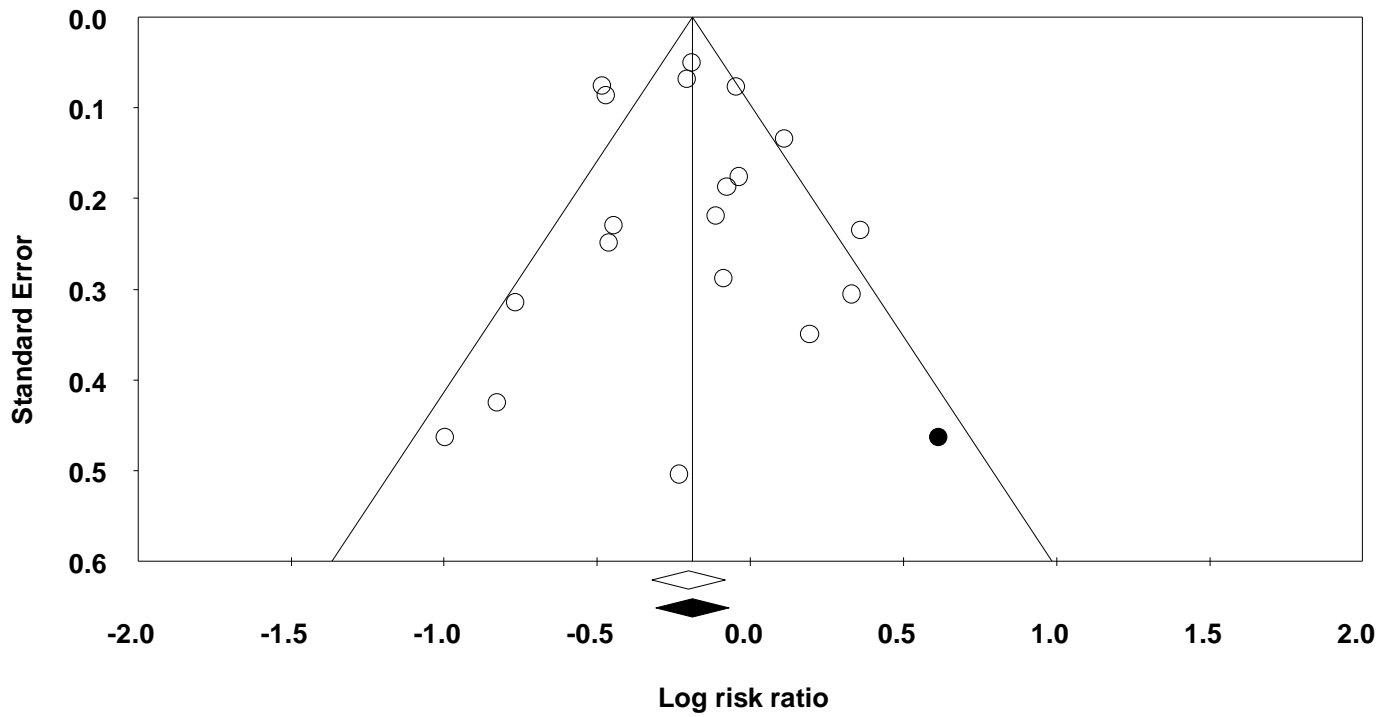

Egger's regression test

Intercept=0.138, 95%CI (-1.309 to 1.585),  $P=0.843$

One data imputed by Duval and Tweedie's trim and fill method

Observed values: Risk Ratio=0.817, 95% confidence interval (0.725-0.920)

Adjusted values: Risk Ratio=0.827, 95% confidence interval (0.733-0.933)

**eFigure 2-2. Funnel plot for all-cause discontinuation**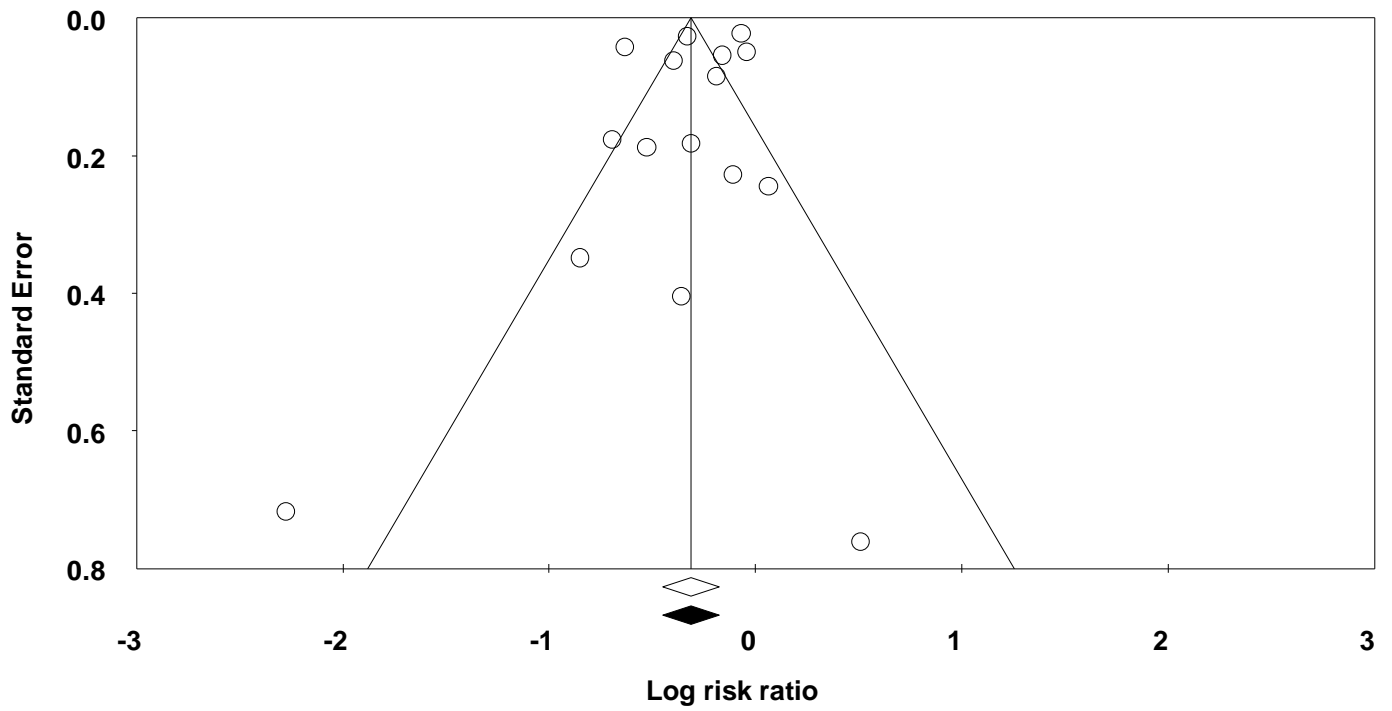

Egger's regression test

Intercept=-1.215, 95%CI (-4.015 to 1.584),  $P=0.368$

No imputed data by Duval and Tweedie's trim and fill method

Observed values: Risk Ratio=0.732, 95% confidence interval (0.639-0.838)

**eFigure 3-1. Forest plot of risk ratio for hospitalization (clozapine vs risperidone)**

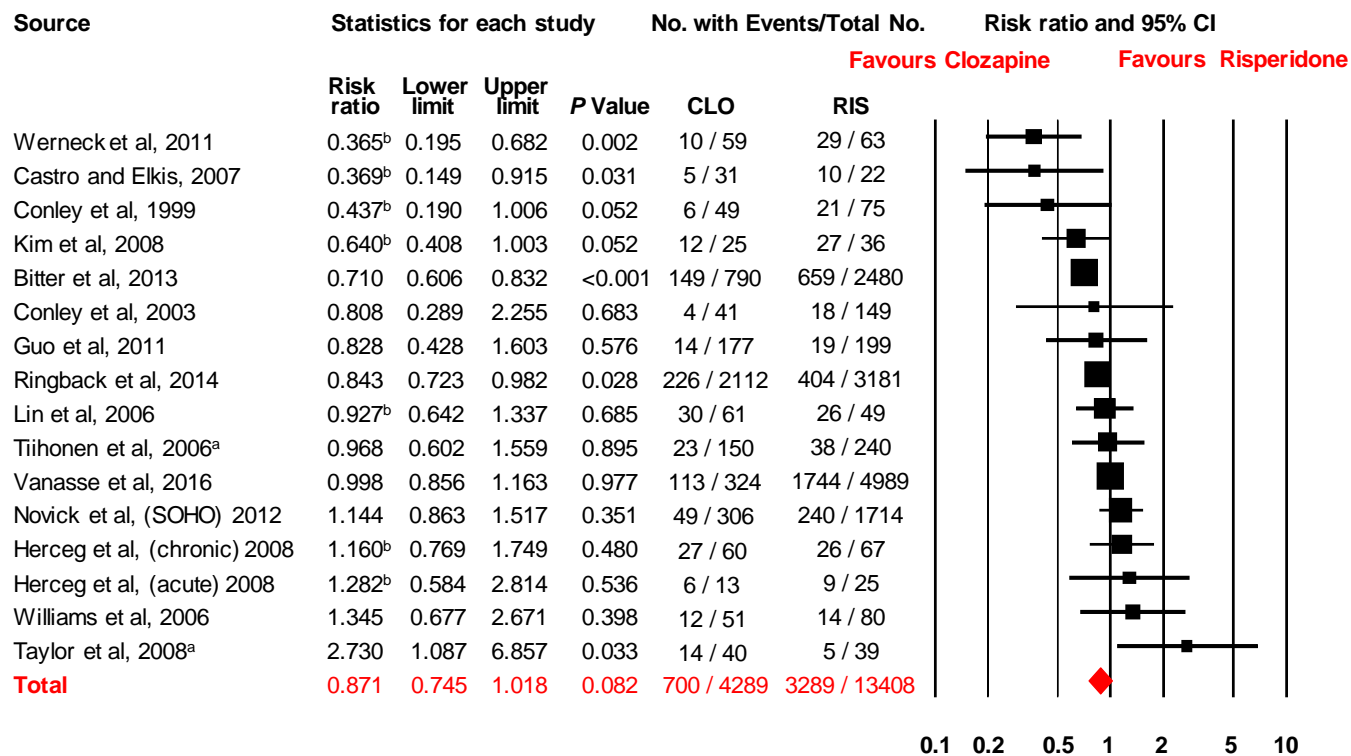

CI, confidence intervals; CLO, clozapine; RIS, risperidone

<sup>a</sup> The Study with unequal observation periods between clozapine and risperidone

The mean of observation period (months); Tiihonen et al. 2006, (CLO=17.0, RIS=6.5), Taylor et al, 2008, (CLO=23.2, RIS=17.4)

<sup>b</sup> Data from Kaplan-Meier estimates

**eFigure 3-2. Forest plot of risk ratio for hospitalization (clozapine vs olanzapine)**

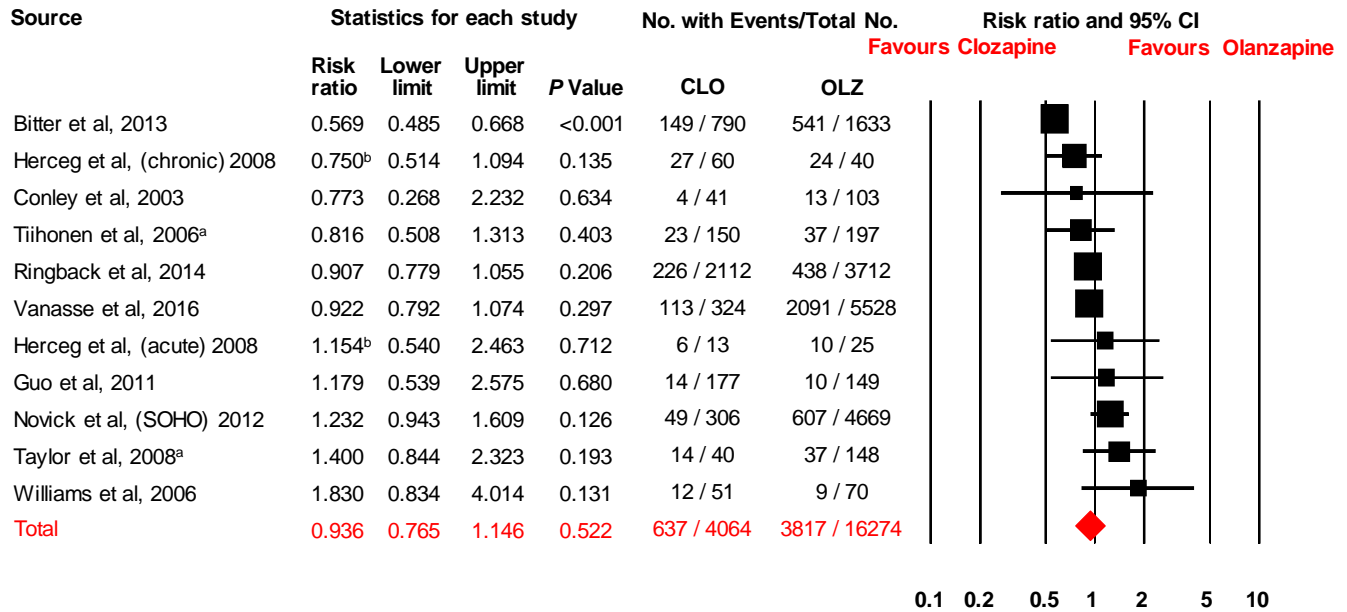

CI, confidence intervals; CLO, clozapine; OLZ, olanzapine

<sup>a</sup> The Study with unequal observation periods between clozapine and olanzapine

The mean of observation period (months); Tiihonen et al. 2006, (CLO=17.0, OLZ=8.4), Taylor et al, 2008, (CLO=23.2, OLZ=21.1)

<sup>b</sup> Data from Kaplan-Meier estimates

**eFigure 3-3. Forest plot of risk ratio for hospitalization (clozapine vs quetiapine)**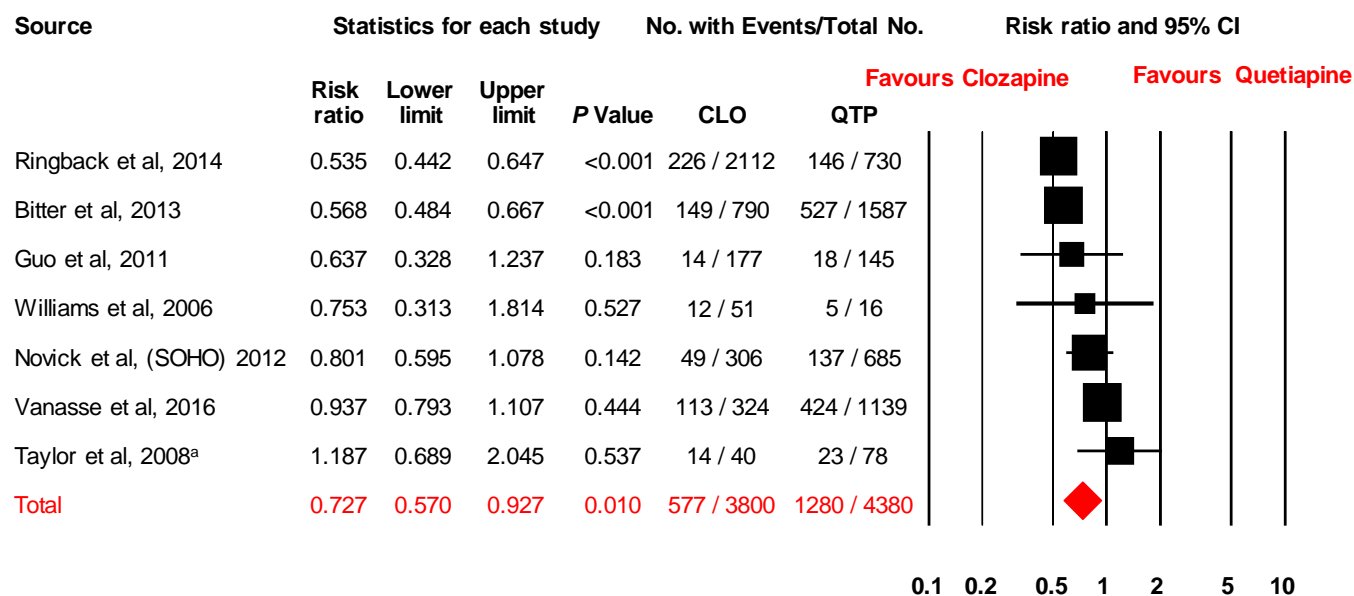

CI, confidence intervals; CLO, clozapine; QTP, quetiapine

<sup>a</sup>The Study with unequal observation periods between clozapine and quetiapine

The mean of observation period (months); Taylor et al, 2008, (CLO=23.2, QTP=22.0)



eFigure 3-4. Forest plot of risk ratio for hospitalization (clozapine vs aripiprazole)

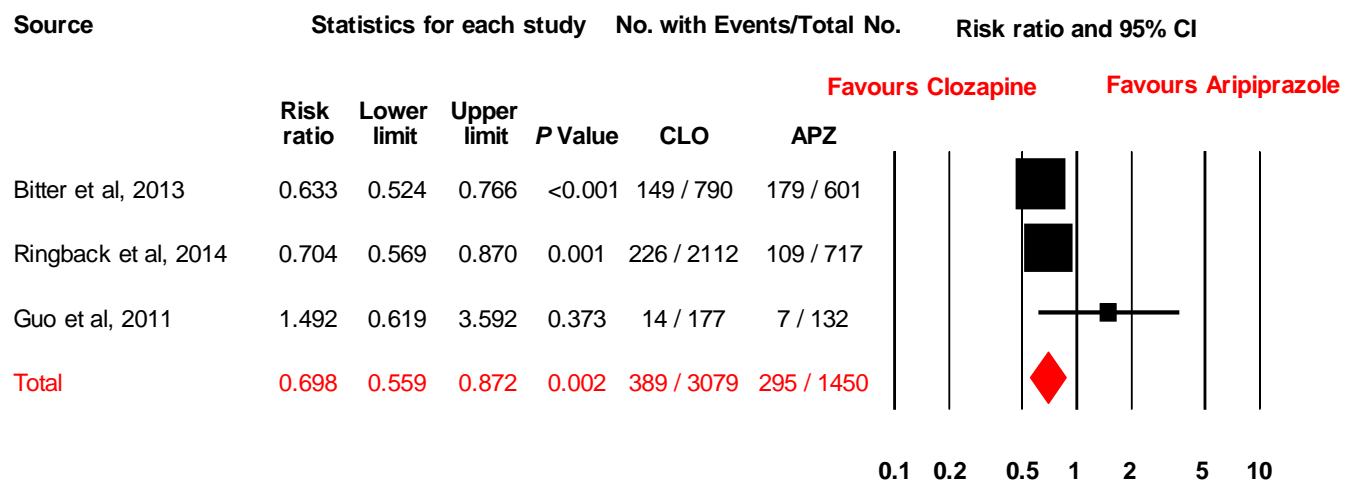

APZ, aripiprazole; CI, confidence intervals; CLO, clozapine

**eFigure 3-5. Forest plot of risk ratio for hospitalization (clozapine vs amisulpride)**

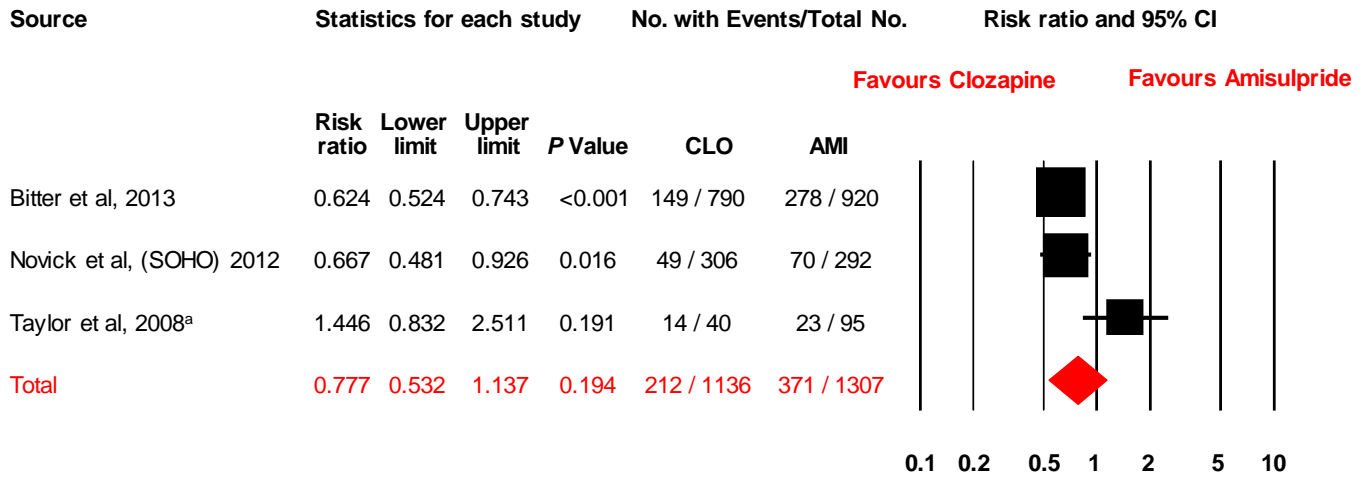

AMI, amisulpride; CI, confidence intervals; CLO, clozapine

<sup>a</sup>The Study with unequal observation periods between clozapine and amisulpride

The mean of observation period (months); Taylor et al, 2008, (CLO=23.2, AMI=23.5)

**eFigure 3-6. Forest plot of risk ratio for hospitalization (at 6 months)**

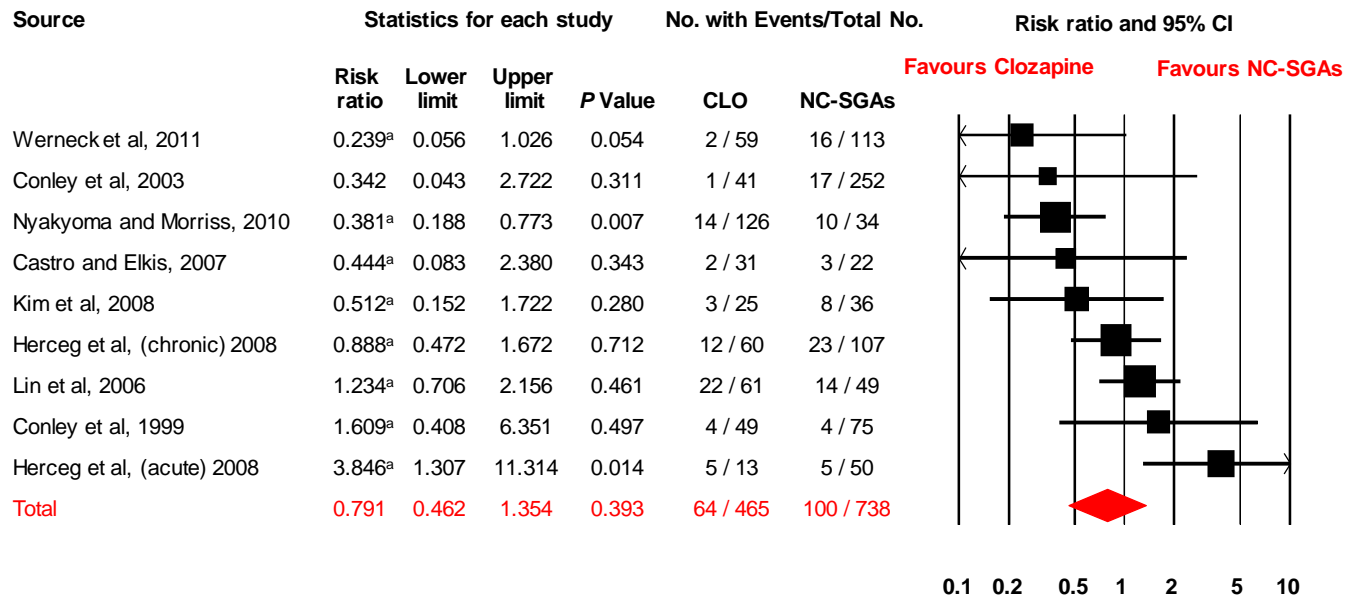

CI, confidence intervals; CLO, clozapine; NC-SGAs, non-clozapine second-generation antipsychotics

<sup>a</sup> Data from Kaplan-Meier estimates

**eFigure 3-7. Forest plot of risk ratio for hospitalization (at 12 months)**

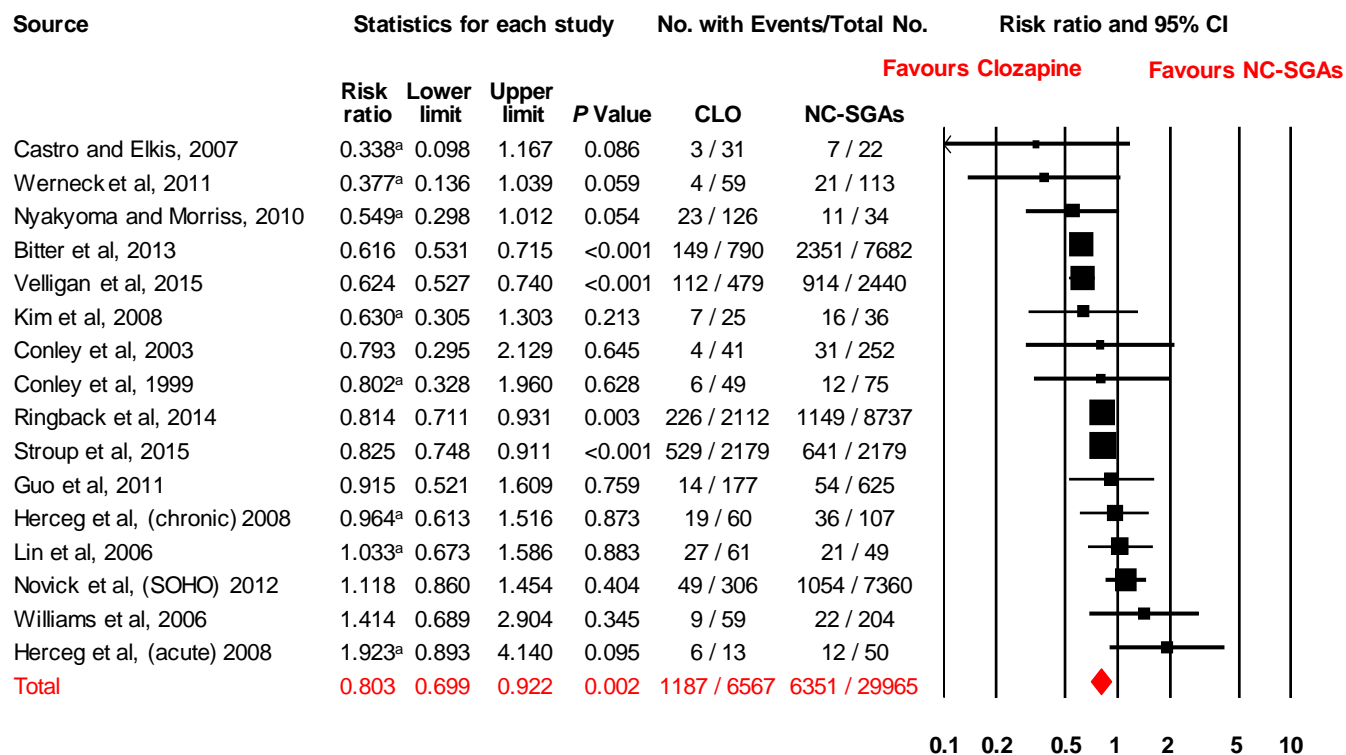

CI, confidence intervals; CLO, clozapine; NC-SGAs, non-clozapine second-generation antipsychotics

<sup>a</sup> Data from Kaplan-Meier estimates

**eFigure 3-8. Forest plot of risk ratio for hospitalization (at 24 months)**

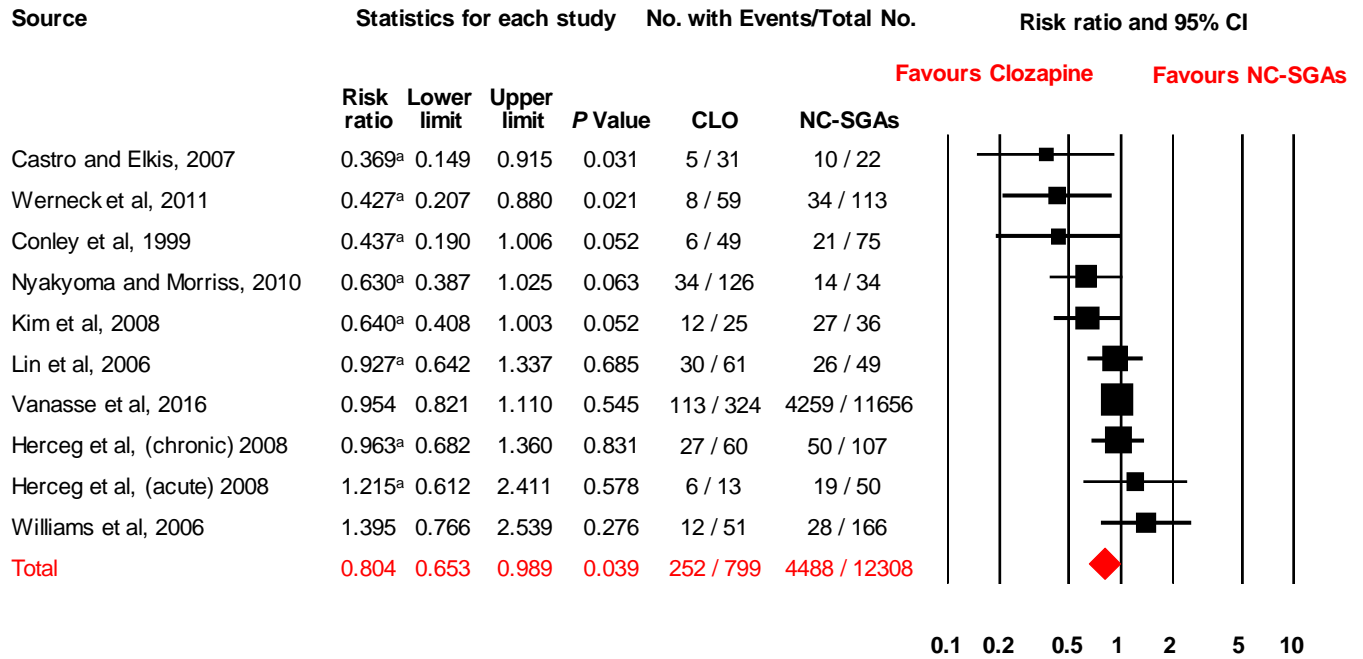

CI, confidence intervals; CLO, clozapine; NC-SGAs, non-clozapine second-generation antipsychotics

<sup>a</sup> Data from Kaplan-Meier estimates

eFigure 3-9. Forest plot of risk ratio for hospitalization (adjusted for follow-up duration)

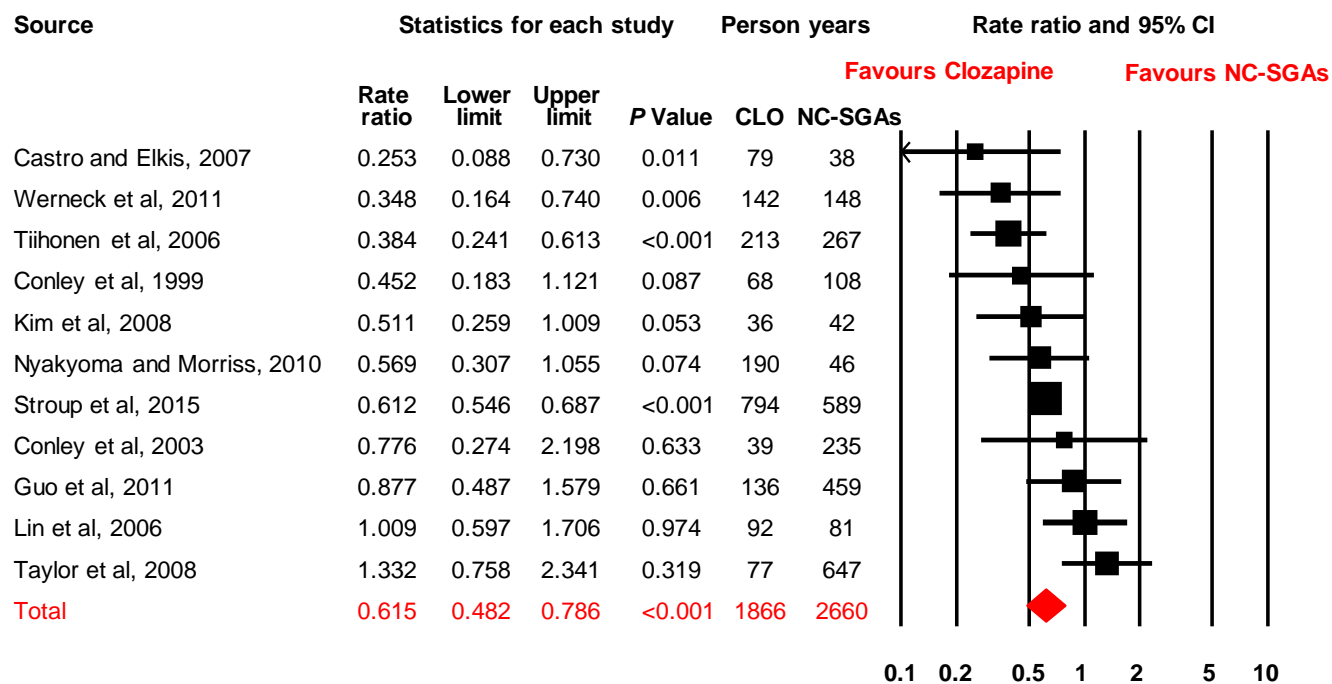

CI, confidence intervals; CLO, clozapine; NC-SGAs, non-clozapine second-generation antipsychotics

eFigure 3-10. Forest plot of hazard ratio for hospitalization

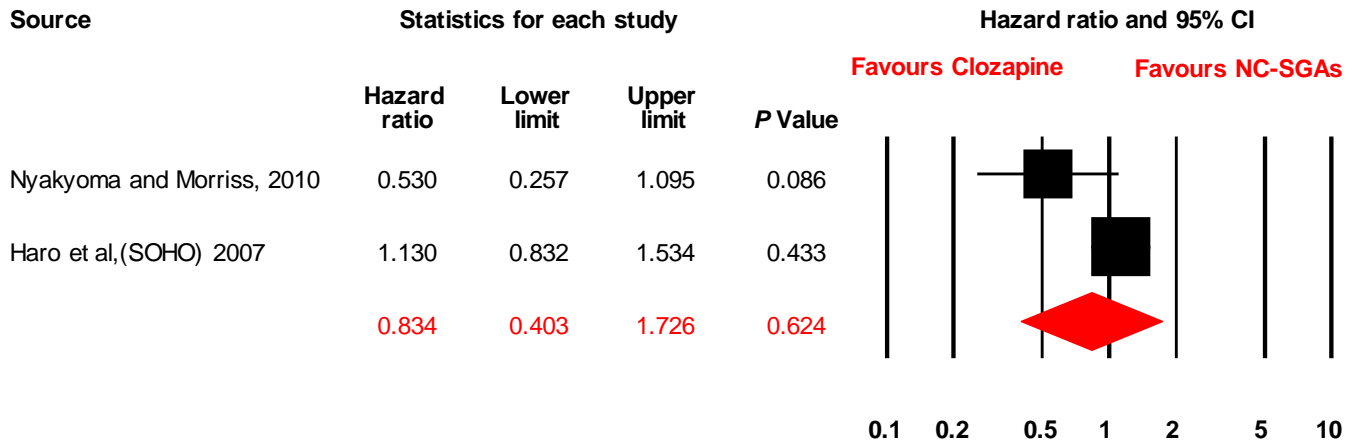

CI, confidence intervals; NC-SGAs, non-clozapine second-generation antipsychotics

**eFigure 3-11. Forest plot of adjusted odds ratio for hospitalization**

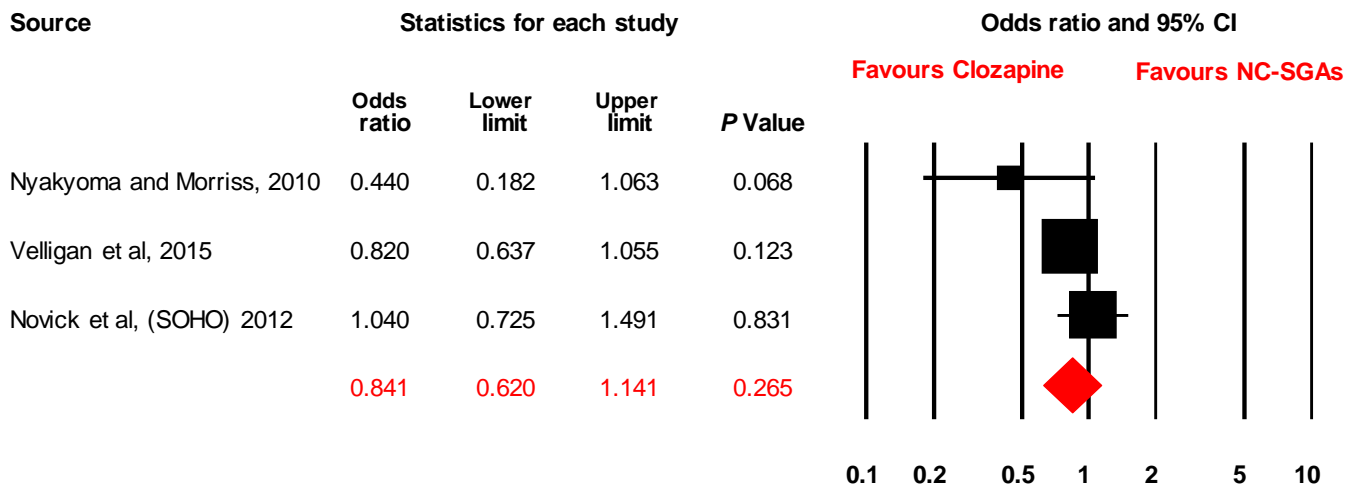

CI, confidence intervals; CLO, clozapine; NC-SGAs, non-clozapine second-generation antipsychotics



**eFigure 3-12. Forest plot of risk ratio for all-cause discontinuation (clozapine vs risperidone)**

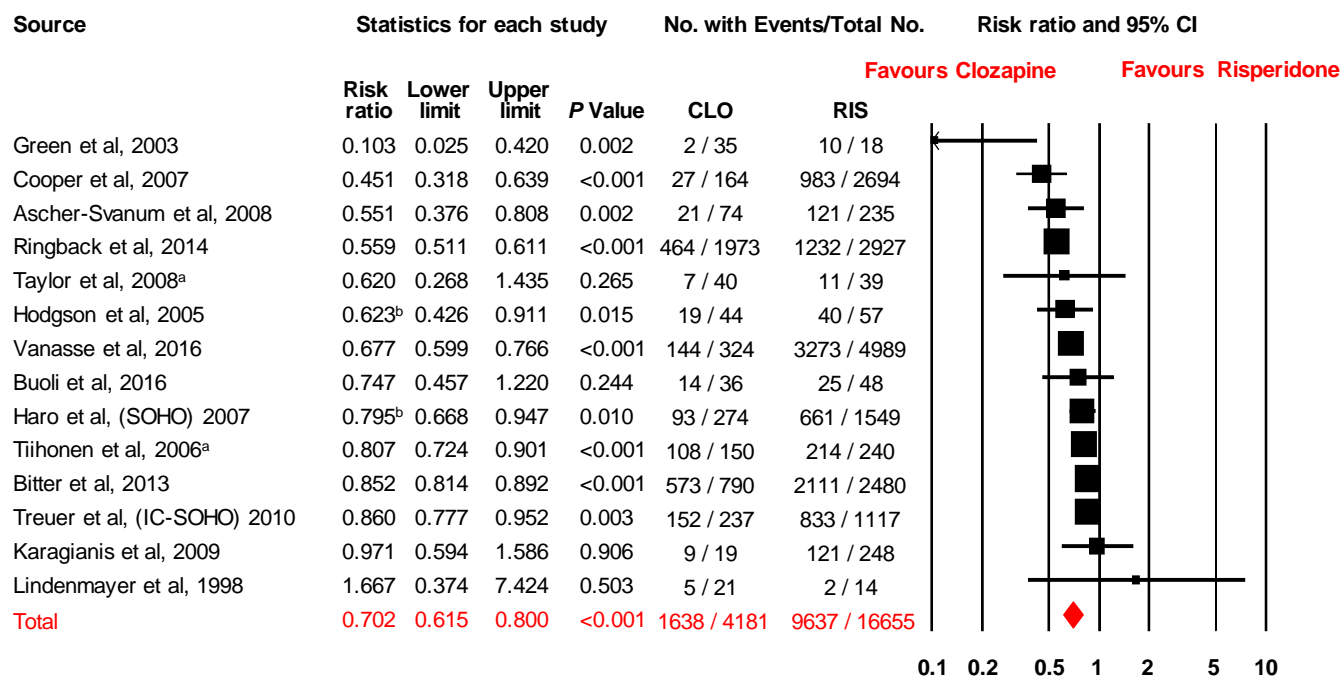

CI, confidence intervals; CLO, clozapine; RIS, risperidone

<sup>a</sup>The Study with unequal observation periods between clozapine and risperidone

The mean of observation period (months); Tiihonen et al. 2006, (CLO=17.0, RIS=6.5), Taylor et al, 2008, (CLO=23.2, RIS=17.4)

<sup>b</sup> Data from Kaplan-Meier estimates

**eFigure 3-13. Forest plot of risk ratio for all-cause discontinuation (clozapine vs olanzapine)**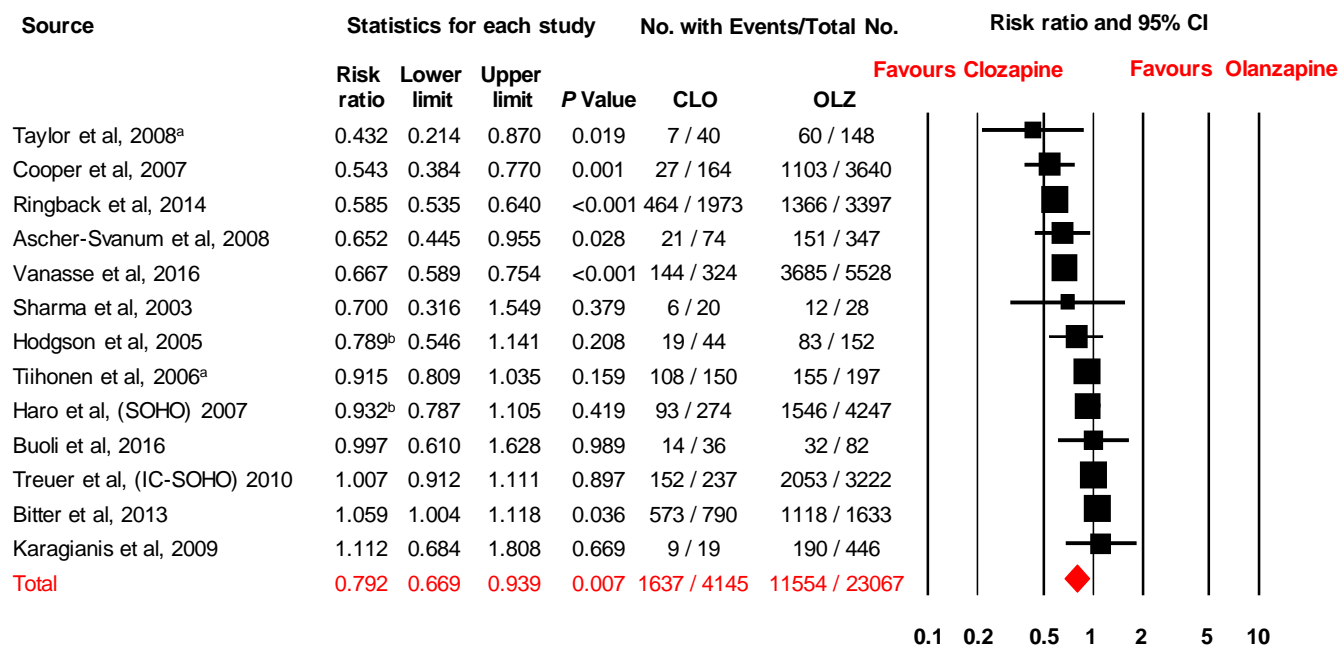

CI, confidence intervals; CLO, clozapine; OLZ, olanzapine

<sup>a</sup>The Study with unequal observation periods between clozapine and olanzapine

The mean of observation period (months); Tiihonen et al. 2006, (CLO=17.0, OLZ=8.4), Taylor et al, 2008, (CLO=23.2, OLZ=21.1)

<sup>b</sup> Data from Kaplan-Meier estimates

**eFigure 3-14. Forest plot of risk ratio for all-cause discontinuation (clozapine vs quetiapine)**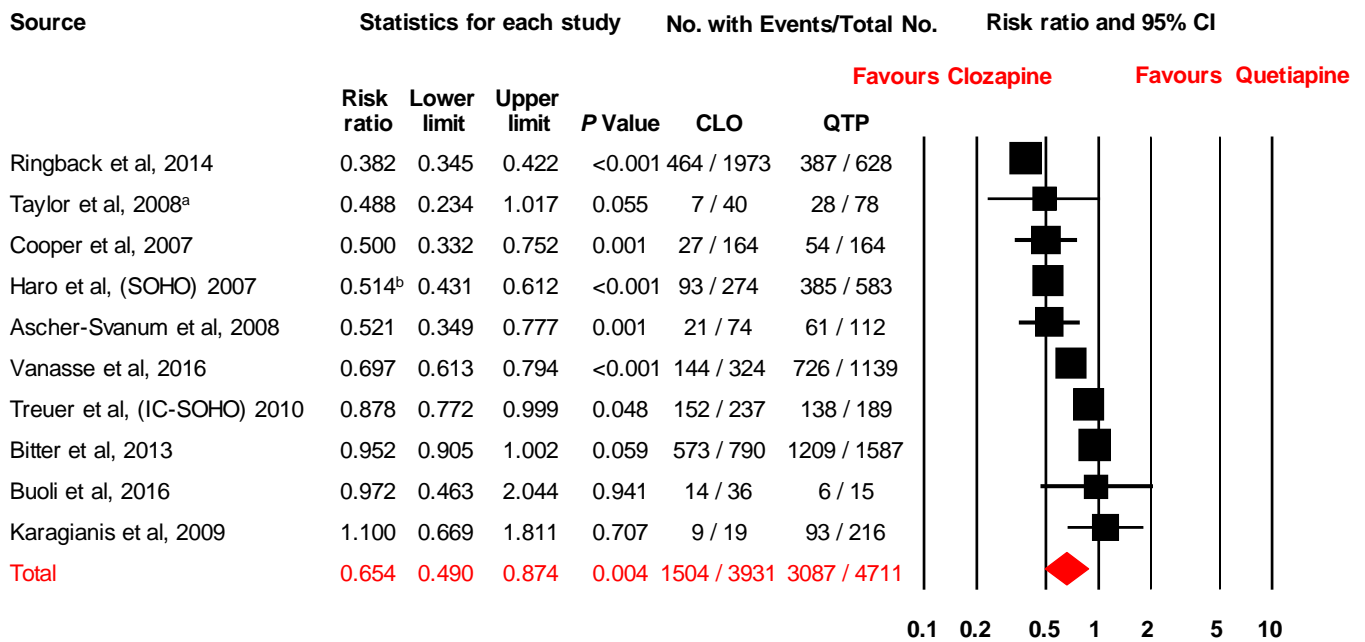

CI, confidence intervals; CLO, clozapine; QTP, quetiapine

<sup>a</sup>The Study with unequal observation periods between clozapine and quetiapine

The mean of observation period (months); Taylor et al, 2008, (CLO=23.2, QTP=22.0)

<sup>b</sup> Data from Kaplan-Meier estimates

**eFigure 3-15. Forest plot of risk ratio for all-cause discontinuation (clozapine vs aripiprazole)**

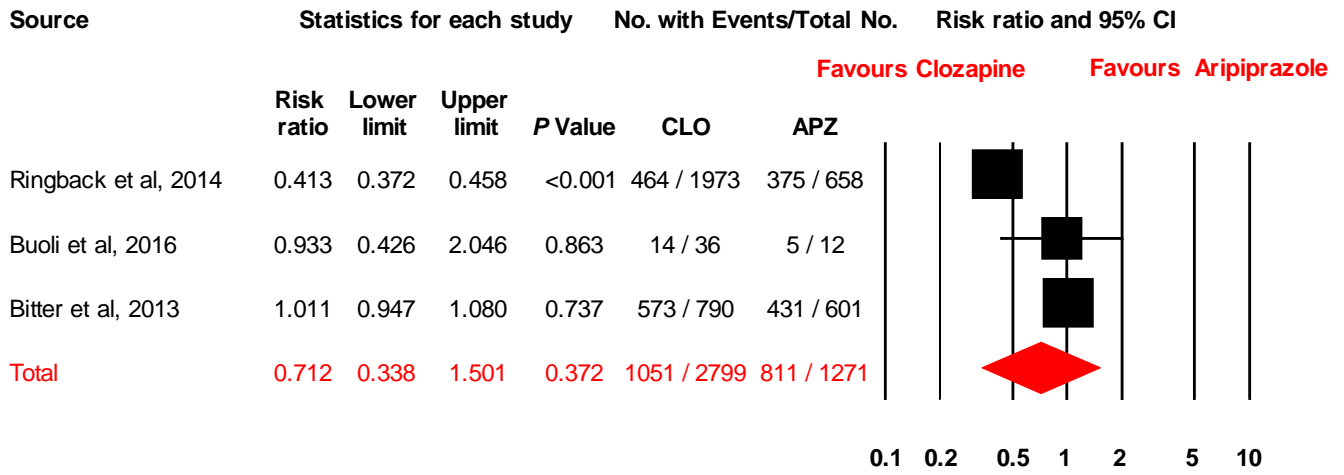

APZ, aripiprazole; CI, confidence intervals; CLO, clozapine

**eFigure 3-16. Forest plot of risk ratio for all-cause discontinuation (clozapine vs amisulpride)**

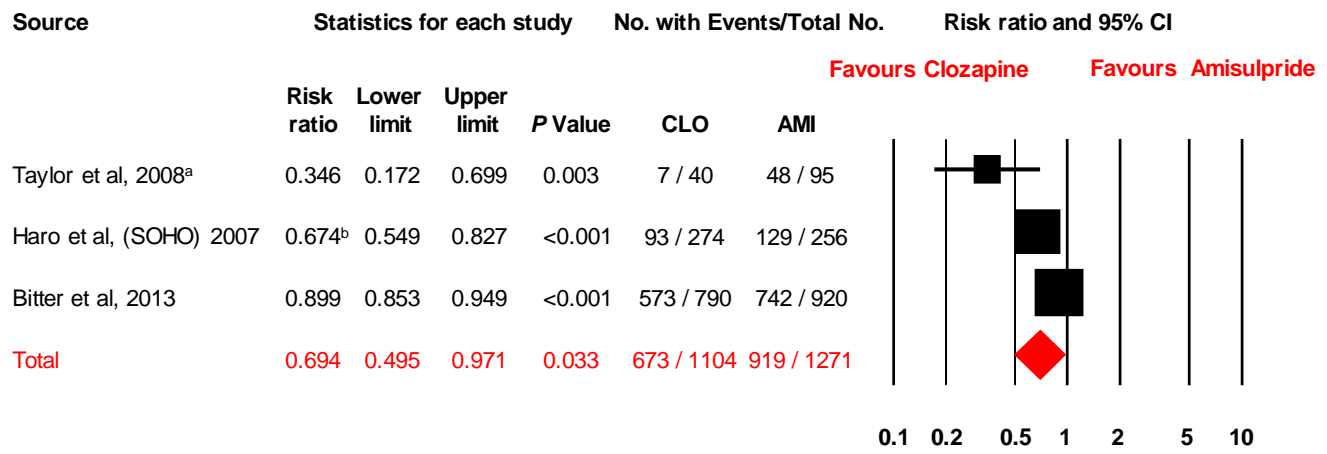

AMI, amisulpride; CI, confidence intervals; CLO, clozapine

<sup>a</sup>The Study with unequal observation periods between clozapine and amisulpride

The mean of observation period (months); Taylor et al, 2008, (CLO=23.2, AMI=23.5)

<sup>b</sup> Data from Kaplan-Meier estimates

**eFigure 3-17. Forest plot of risk ratio for all-cause discontinuation (at 6 months)**

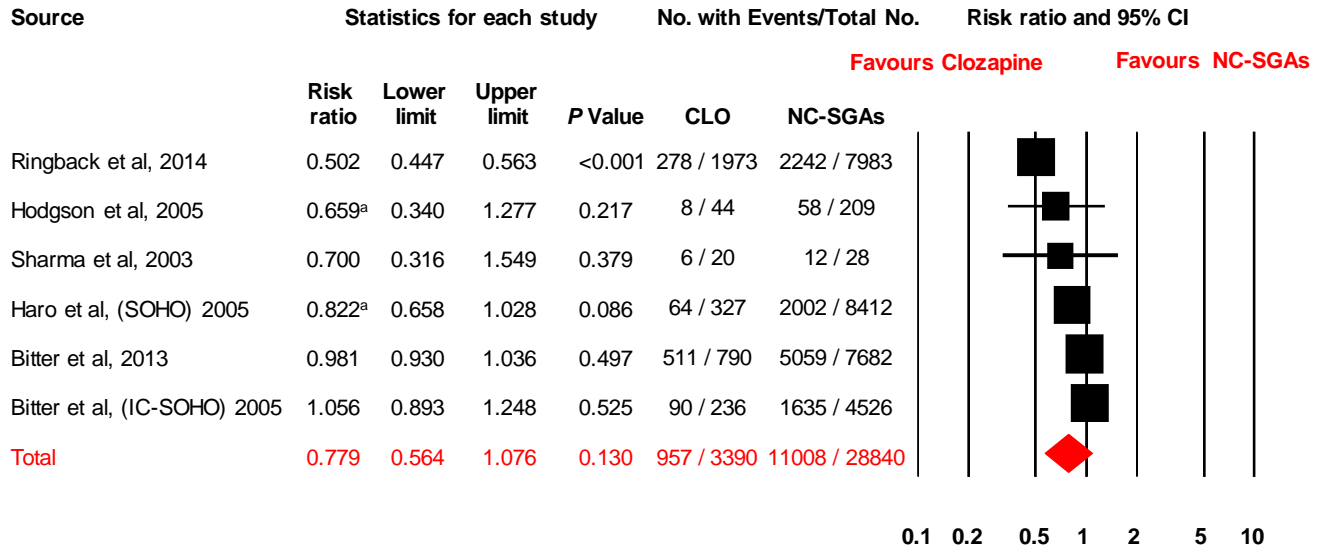

CI, confidence intervals; CLO, clozapine; NC-SGAs, non-clozapine second-generation antipsychotics

<sup>a</sup> Data from Kaplan-Meier estimates

**eFigure 3-18. Forest plot of risk ratio for all-cause discontinuation (at 12 months)**

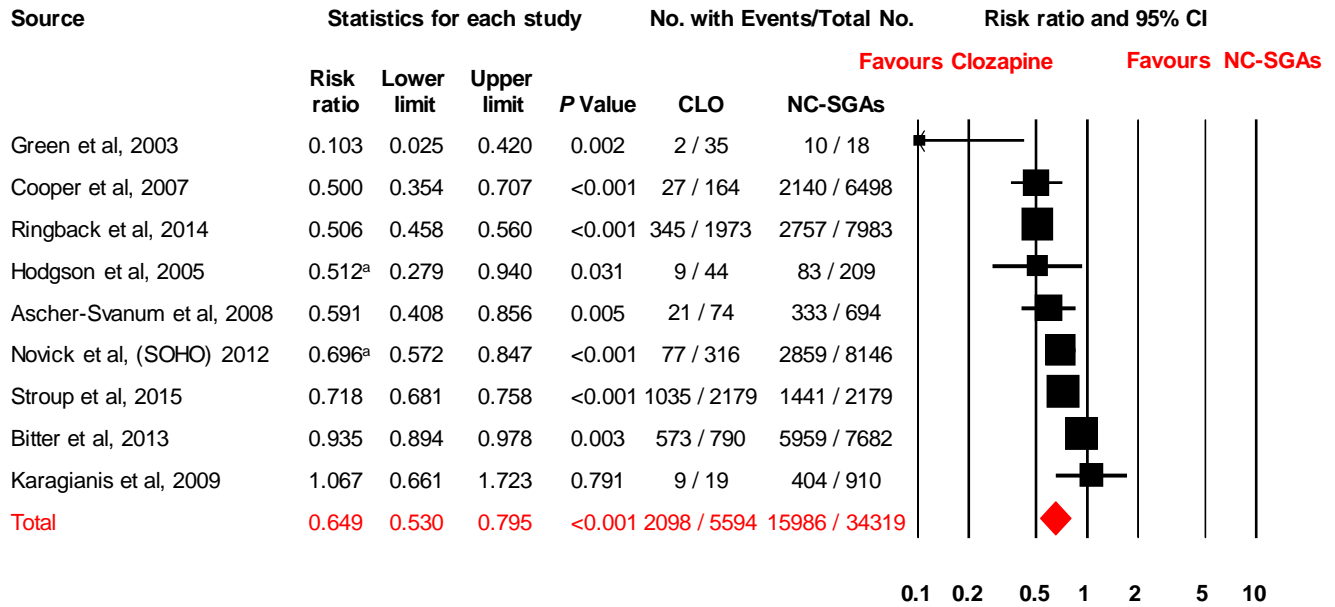

CI, confidence intervals; CLO, clozapine; NC-SGAs, non-clozapine second-generation antipsychotics

<sup>a</sup> Data from Kaplan-Meier estimates

**eFigure 3-19. Forest plot of risk ratio for all-cause discontinuation (at 24 months)**

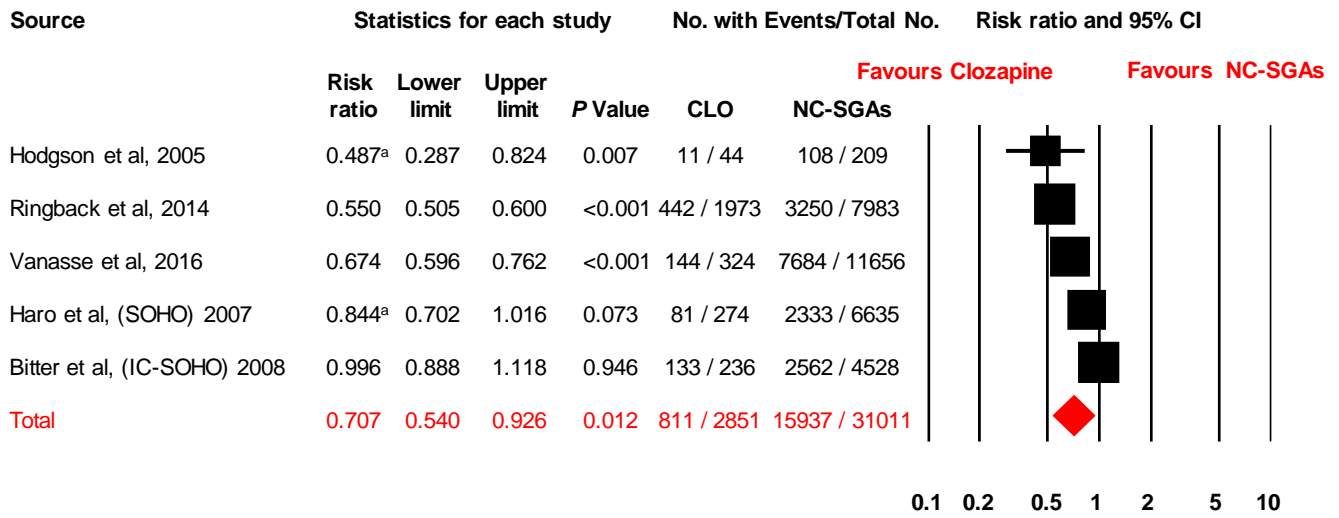

CI, confidence intervals; CLO, clozapine; NC-SGAs, non-clozapine second-generation antipsychotics

<sup>a</sup> Data from Kaplan-Meier estimates



**eFigure 3-20. Forest plot of risk ratio for all-cause discontinuation (at 36 months)**

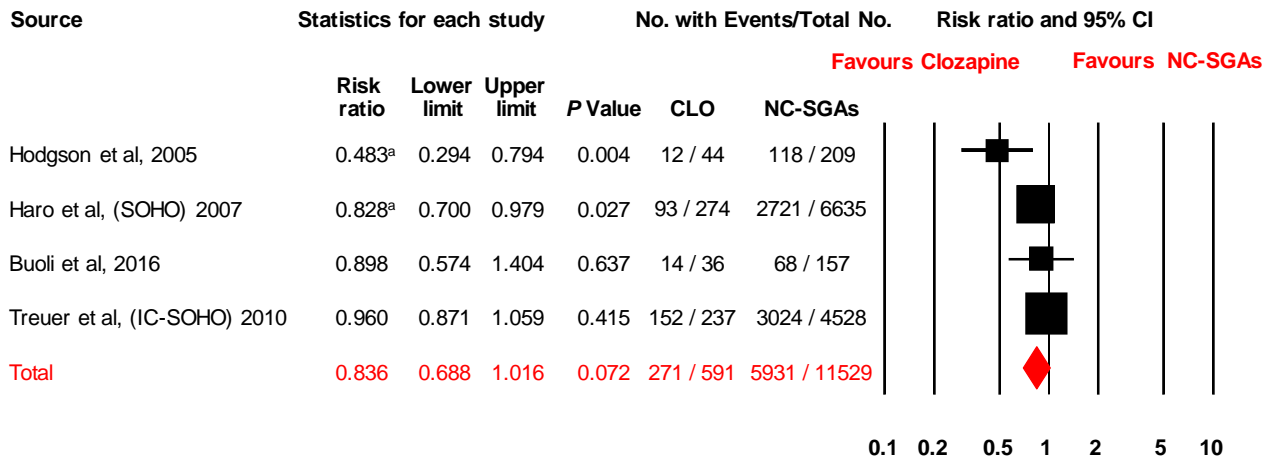

CI, confidence intervals; CLO, clozapine; NC-SGAs, non-clozapine second-generation antipsychotics

<sup>a</sup> Data from Kaplan-Meier estimates

**eFigure 3-21. Forest plot of risk ratio for all-cause discontinuation (adjusted for follow-up duration)**

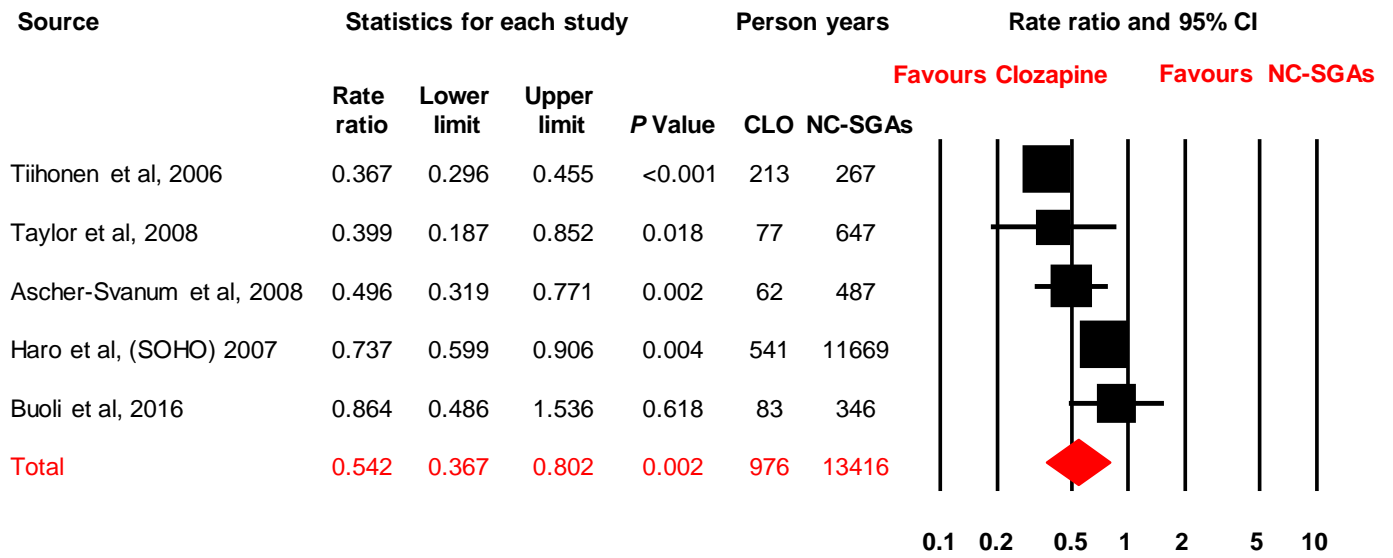

CI, confidence intervals; CLO, clozapine; NC-SGAs, non-clozapine second-generation antipsychotics

**eFigure 3-22. Forest plot of hazard ratio for all-cause discontinuation**

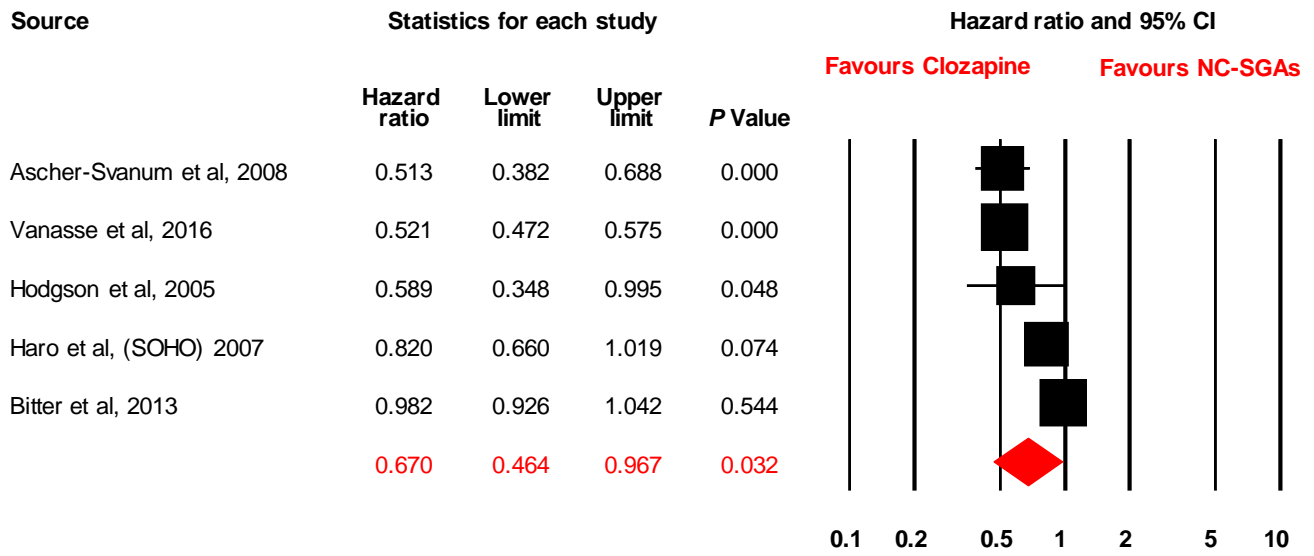

CI, confidence intervals; CLO, clozapine; NC-SGAs, non-clozapine second-generation antipsychotics

**eFigure 3-23. Forest plot of adjusted odds ratio for all-cause discontinuation**

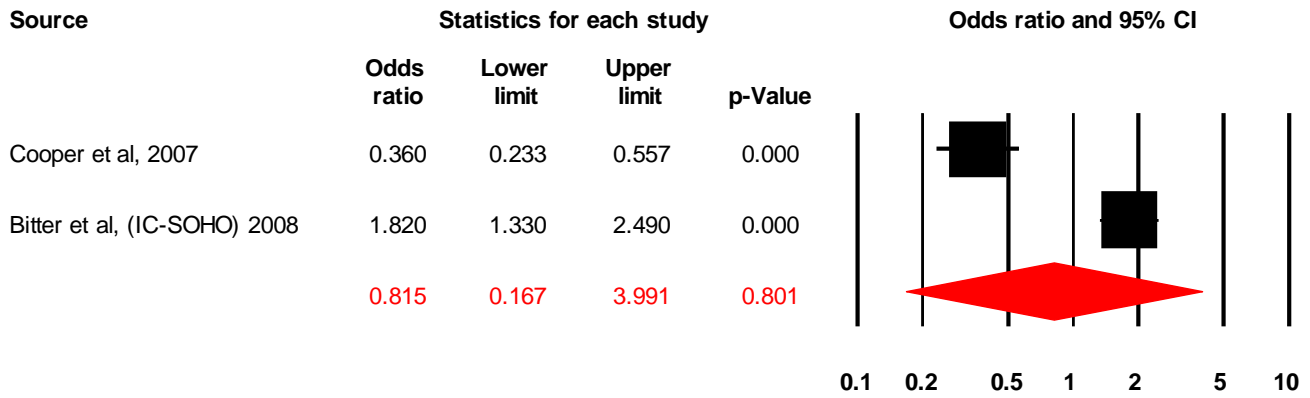

CI, confidence intervals; CLO, clozapine; NC-SGAs, non-clozapine second-generation antipsychotics

**eFigure 4-1. Forest plot of standardized mean difference for overall symptoms**

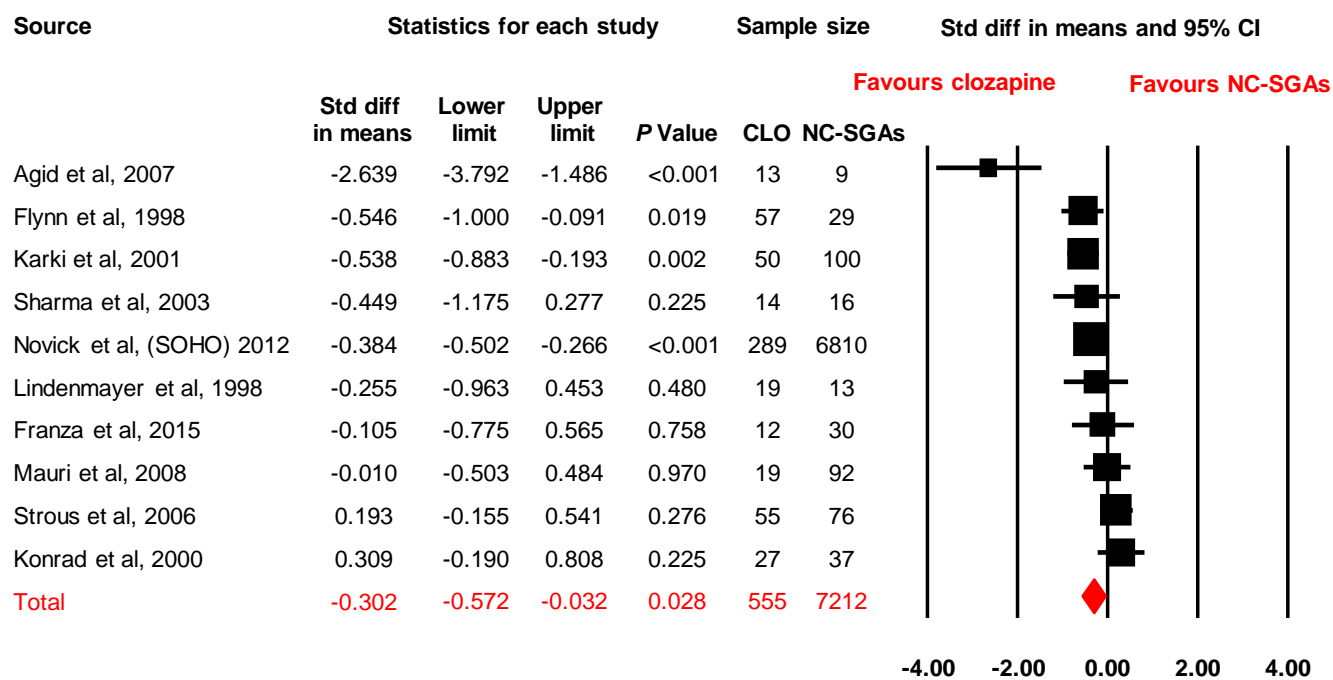

CI, confidence intervals; CLO, clozapine; NC-SGAs, non-clozapine second-generation antipsychotics; Std diff, standardized difference

**eFigure 4-2. Forest plot of standardized mean difference for positive symptoms**

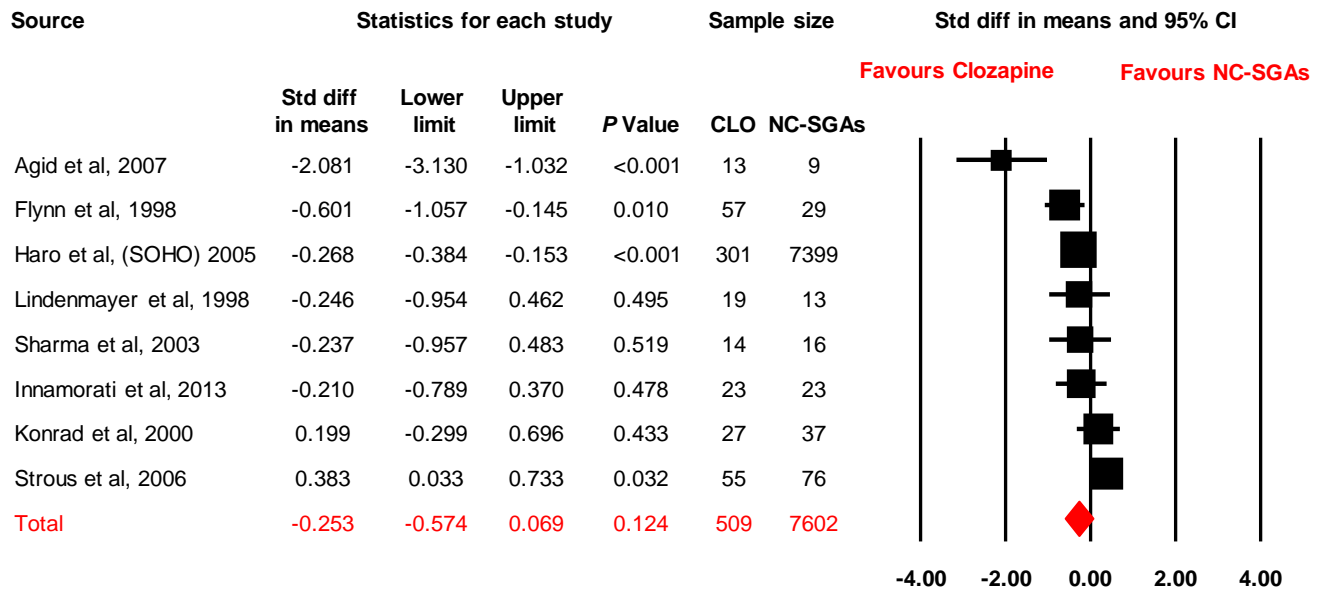

CI, confidence intervals; CLO, clozapine; NC-SGAs, non-clozapine second-generation antipsychotics; Std diff, standardized difference

**eFigure 4-3. Forest plot of standardized mean difference for negative symptoms**

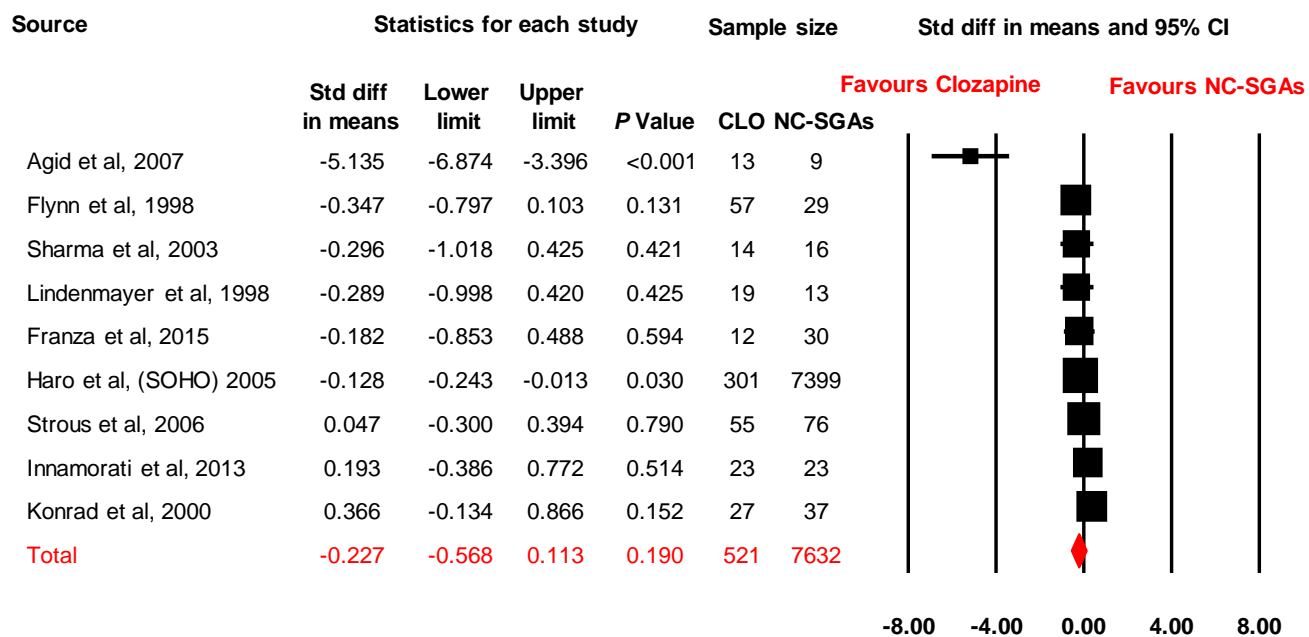

CI, confidence intervals; CLO, clozapine; NC-SGAs, non-clozapine second-generation antipsychotics; Std diff, standardized difference

**eFigure 4-4. Forest plot of standardized mean difference for general symptoms**

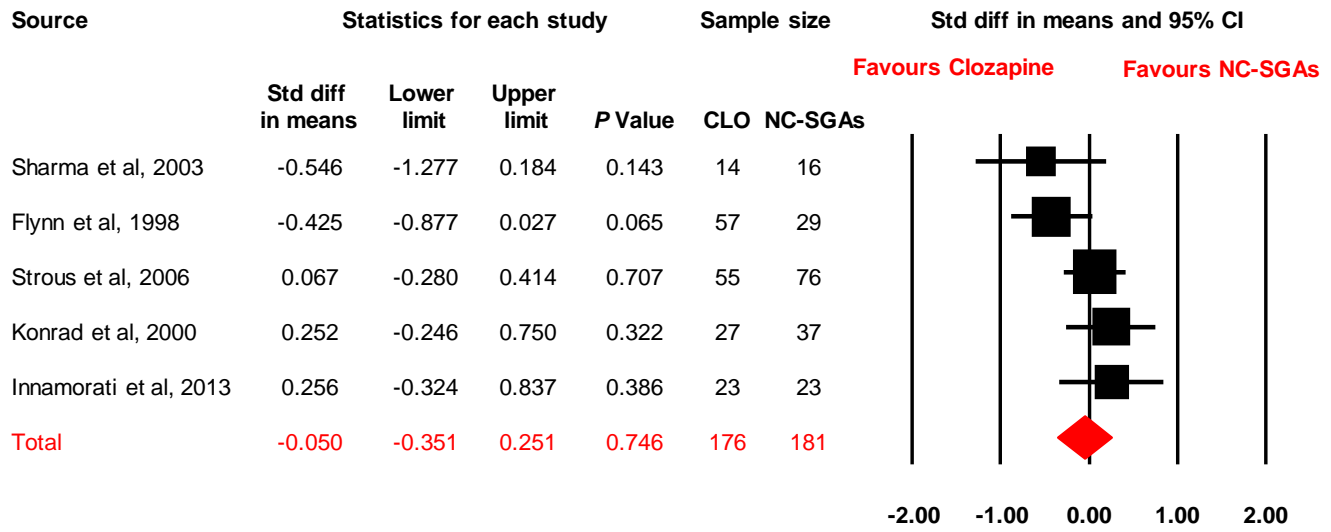

CI, confidence intervals; CLO, clozapine; NC-SGAs, non-clozapine second-generation antipsychotics; Std diff, standardized difference



**eFigure 4-5. Forest plot of standardized mean difference for depressive symptoms**

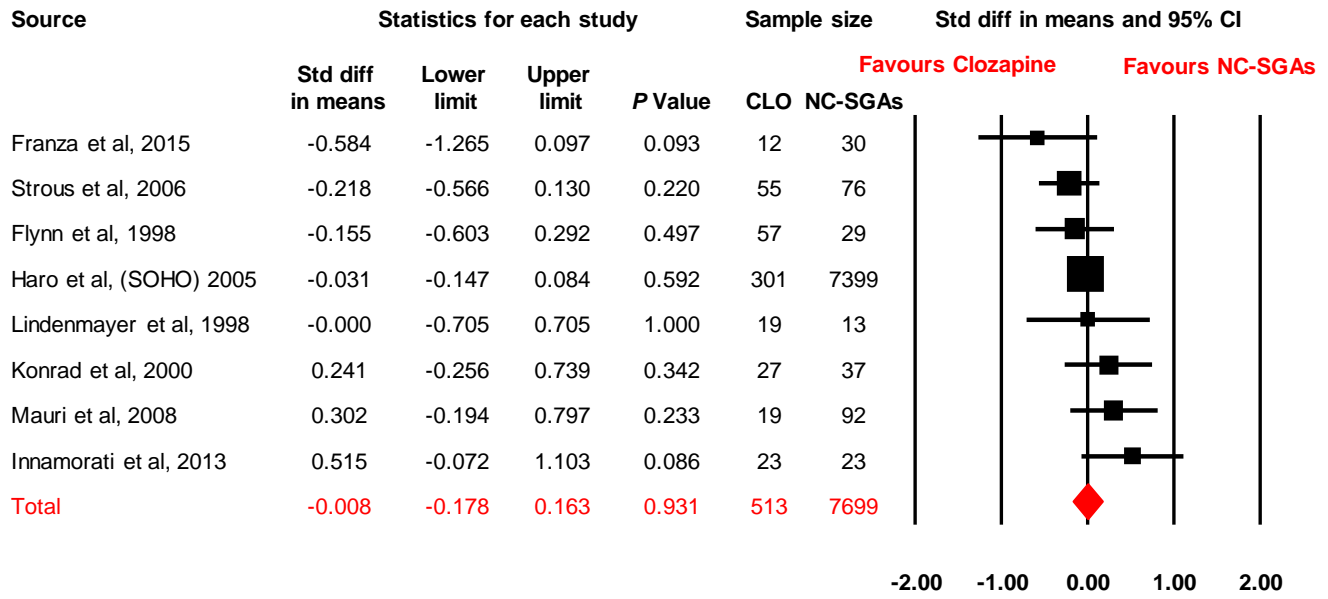

CI, confidence intervals; CLO, clozapine; NC-SGAs, non-clozapine second-generation antipsychotics; Std diff, standardized difference

**eFigure 4-6. Forest plot of standardized mean difference for cognitive symptoms**

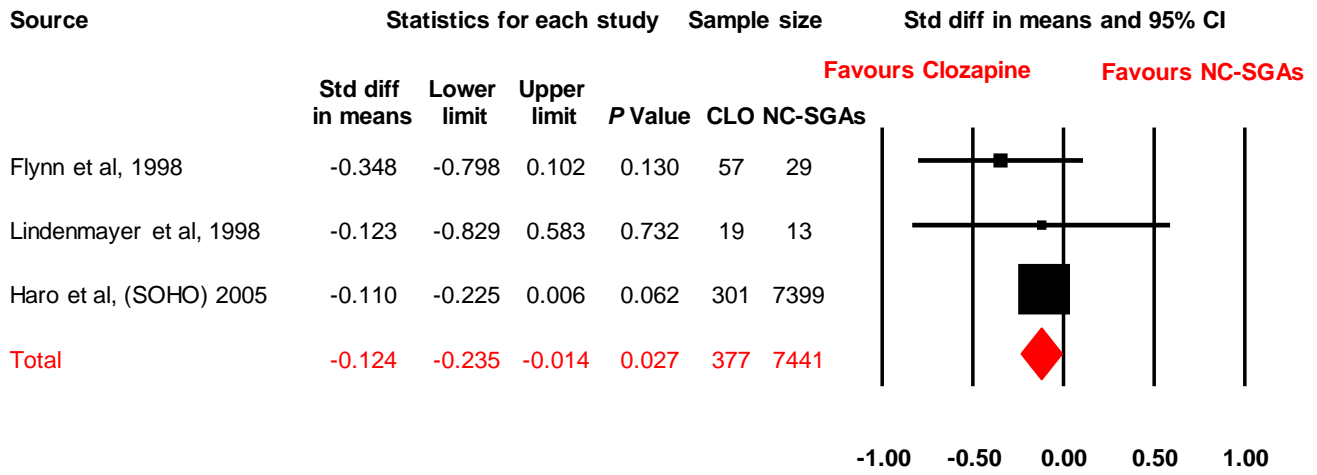

CI, confidence intervals; CLO, clozapine; NC-SGAs, non-clozapine second-generation antipsychotics; Std diff, standardized difference

eFigure 4-7. Forest plot of standardized mean difference for clinical global impressions

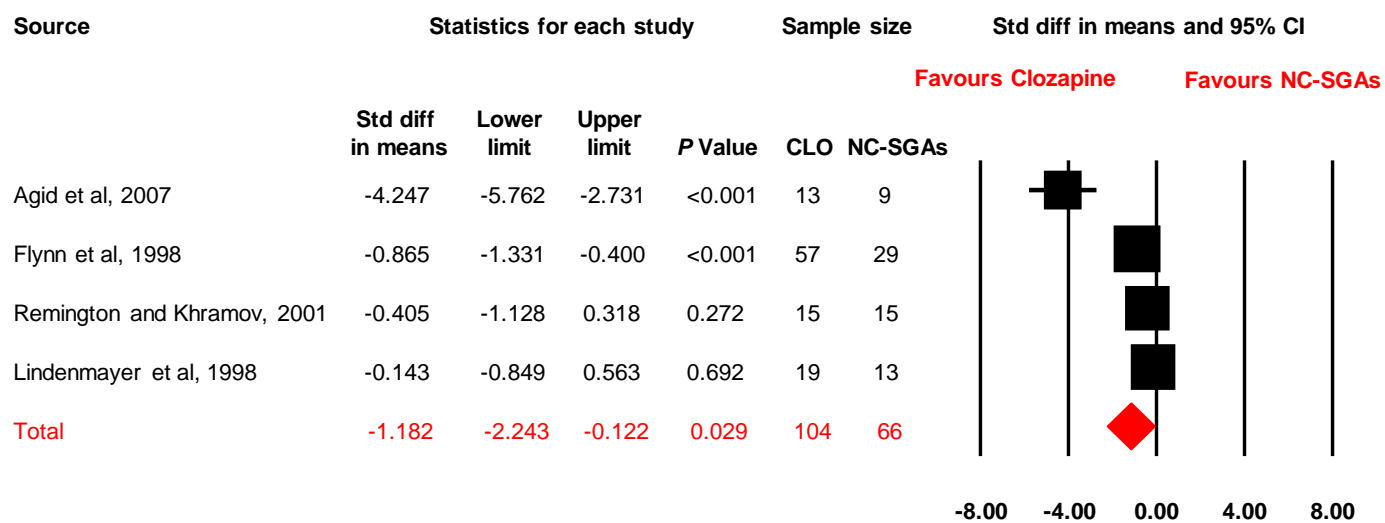

CI, confidence intervals; CLO, clozapine; NC-SGAs, non-clozapine second-generation antipsychotics; Std diff, standardized difference

eFigure 4-8. Forest plot of rate ratio for frequency of hospitalization

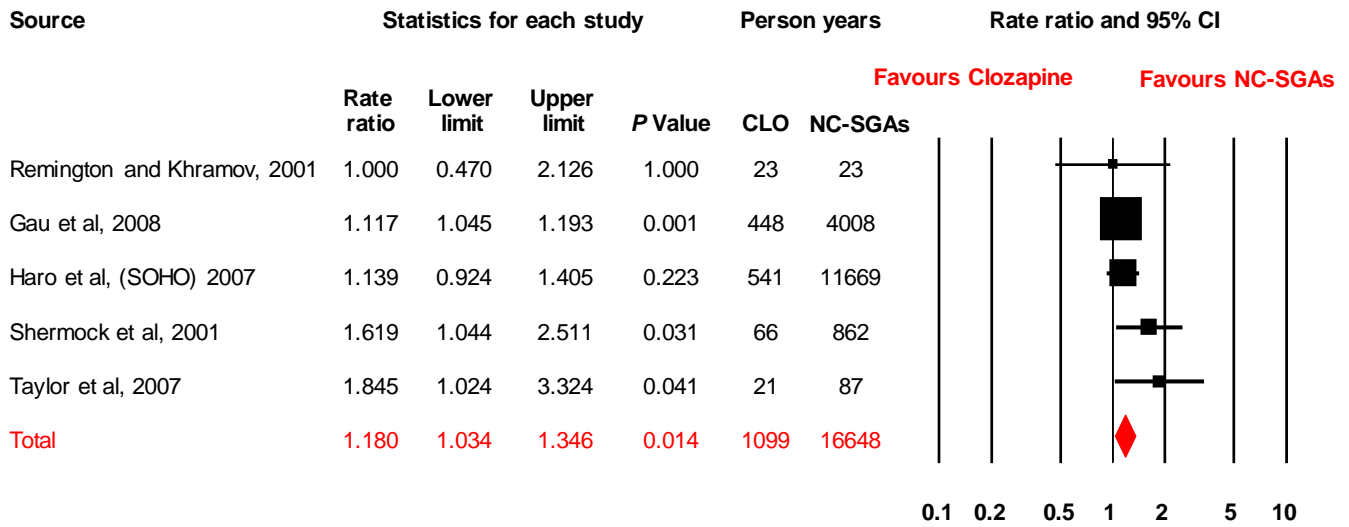

CI, confidence intervals; CLO, clozapine; NC-SGAs, non-clozapine second-generation antipsychotics

**eFigure 4-9. Forest plot of standardized mean difference for length of hospitalization**

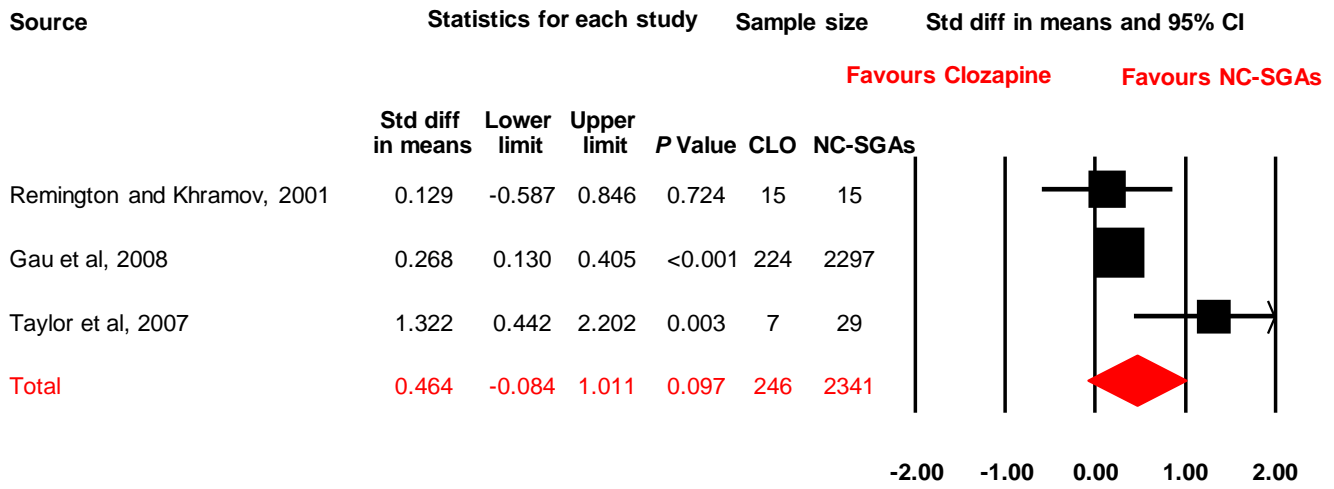

CI, confidence intervals; CLO, clozapine; NC-SGAs, non-clozapine second-generation antipsychotics; Std diff, standardized difference

eFigure 4-10. Forest plot of risk ratio for suicide attempt/self-injurious behavior

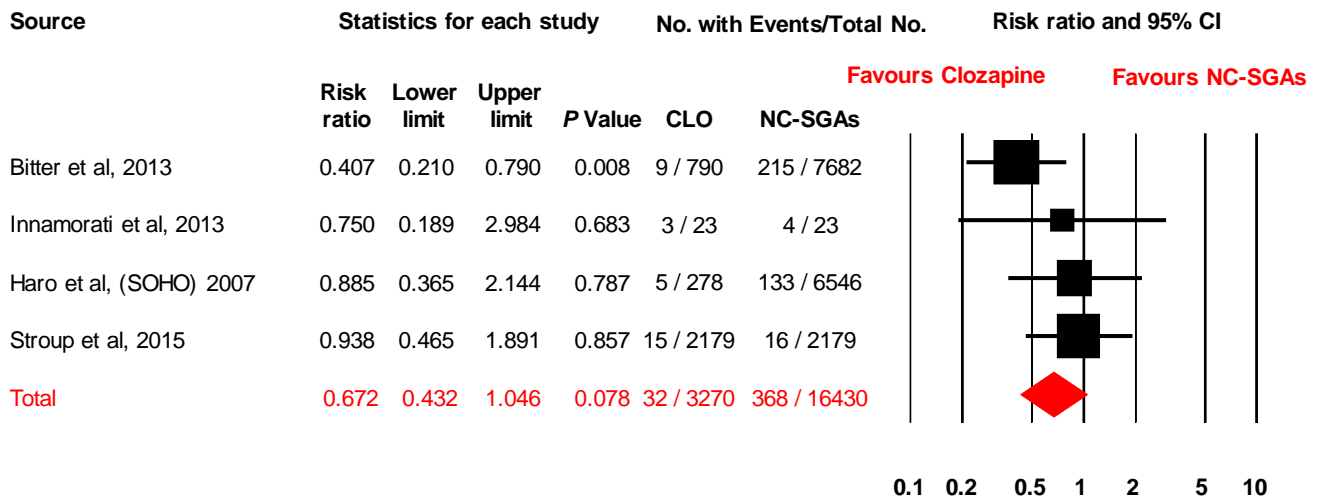

CI, confidence intervals; CLO, clozapine; NC-SGAs, non-clozapine second-generation antipsychotics

eFigure 4-11. Forest plot of risk ratio for response

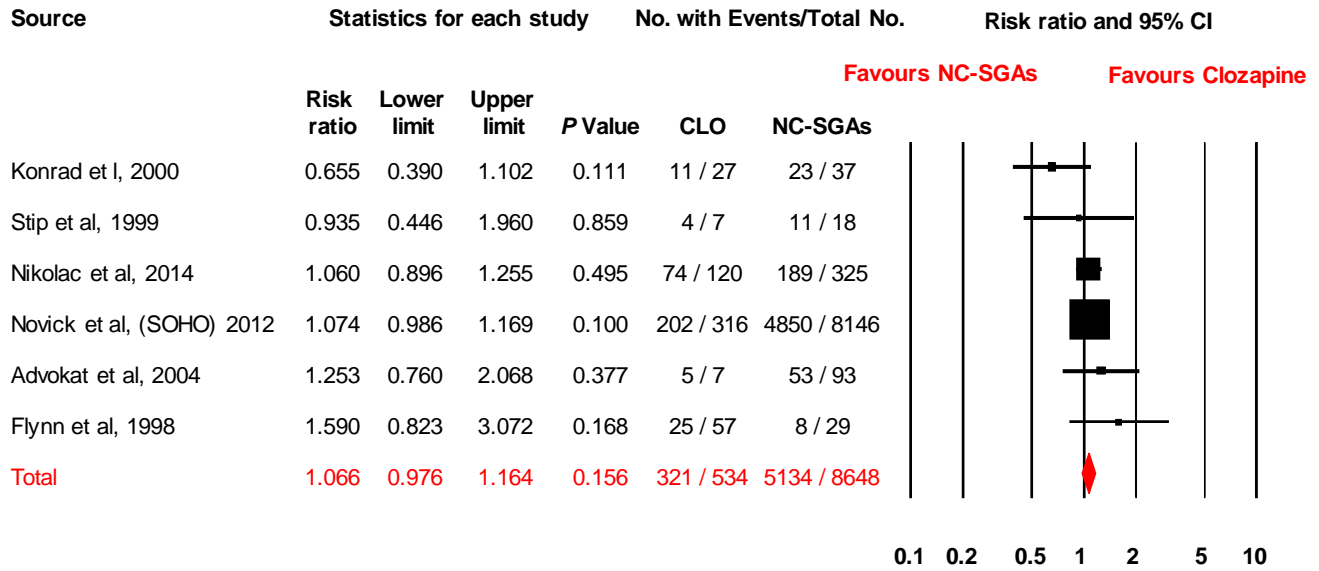

CI, confidence intervals; CLO, clozapine; NC-SGAs, non-clozapine second-generation antipsychotics

eFigure 4-12. Forest plot of risk ratio for death

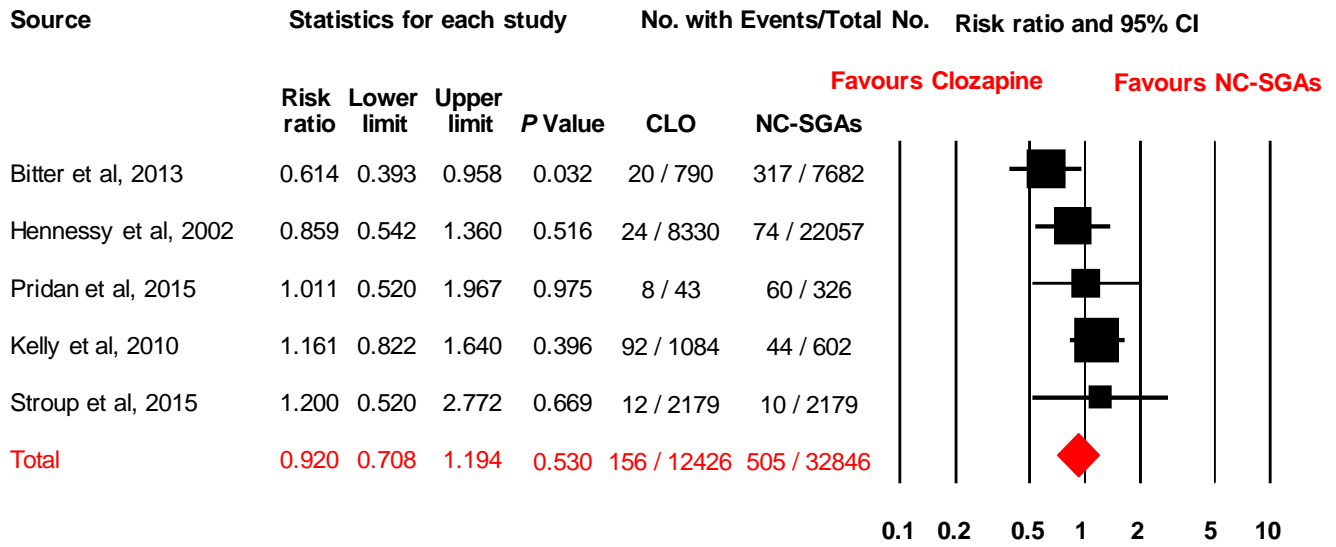

CI, confidence intervals; CLO, clozapine; NC-SGAs, non-clozapine second-generation antipsychotics



eFigure 4-13. Forest plot of standardized mean difference for EPS score

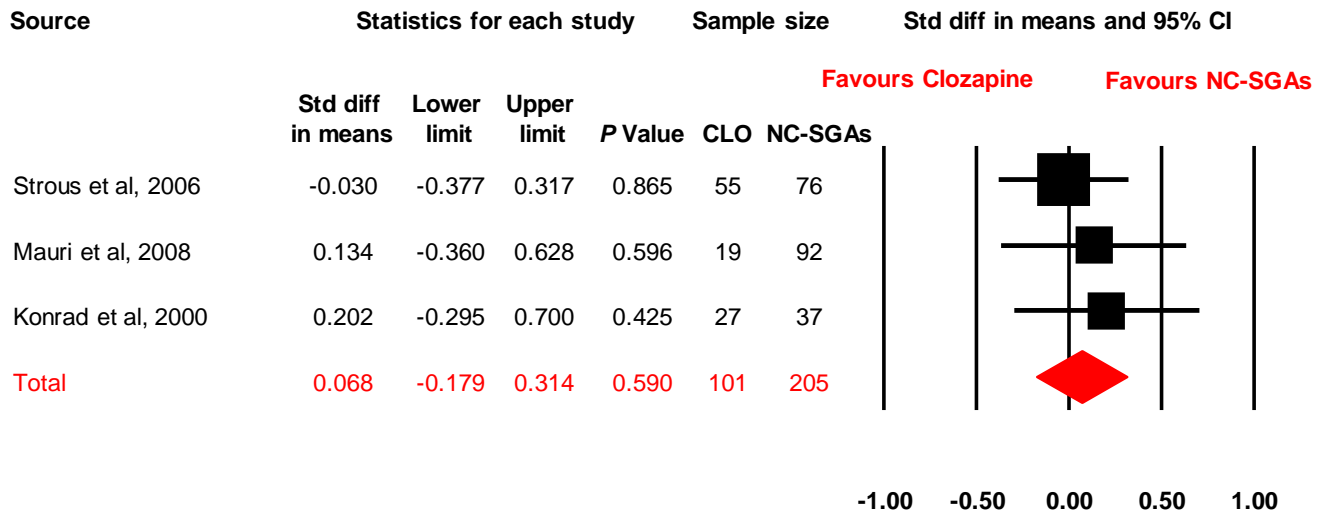

CI, confidence intervals; CLO, clozapine; EPS, extrapyramidal symptoms; NC-SGAs, non-clozapine second-generation antipsychotics; Std diff, standardized difference

eFigure 4-14. Forest plot of risk ratio for EPS risk/Anticholinergic use

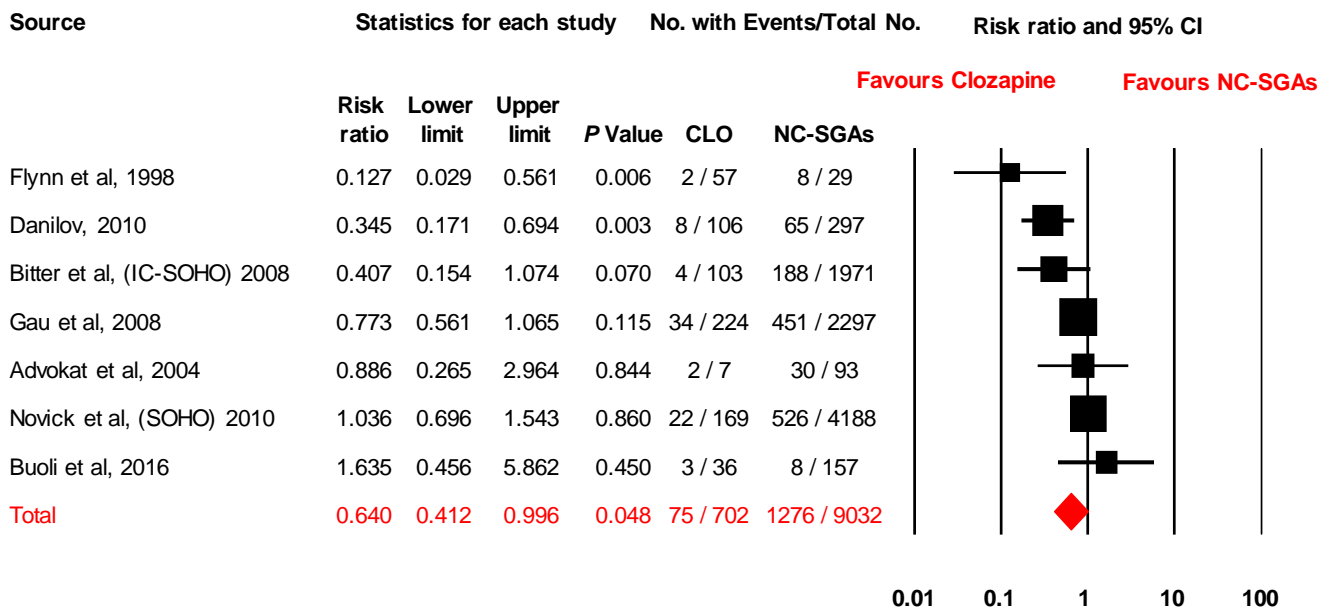

CI, confidence intervals; CLO, clozapine; EPS, extrapyramidal symptoms; NC-SGAs, non-clozapine second-generation antipsychotics; Std diff, standardized difference

eFigure 4-15. Forest plot of risk ratio for weight gain

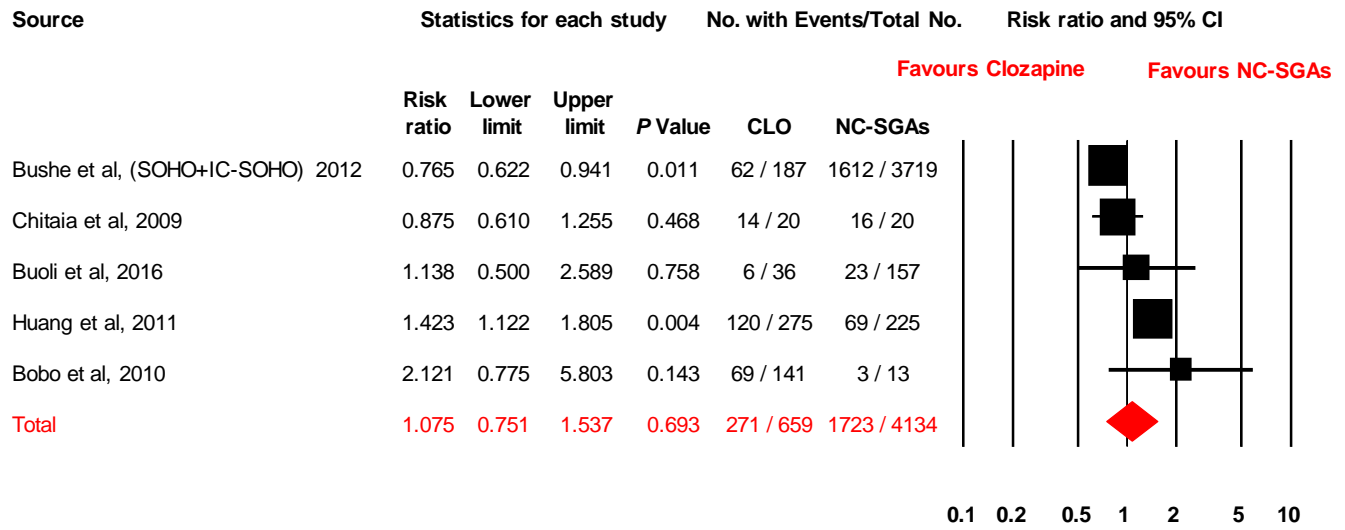

CI, confidence intervals; CLO, clozapine; NC-SGAs, non-clozapine second-generation antipsychotics; Std diff, standardized difference

eFigure 4-16. Forest plot of risk ratio for diabetes mellitus

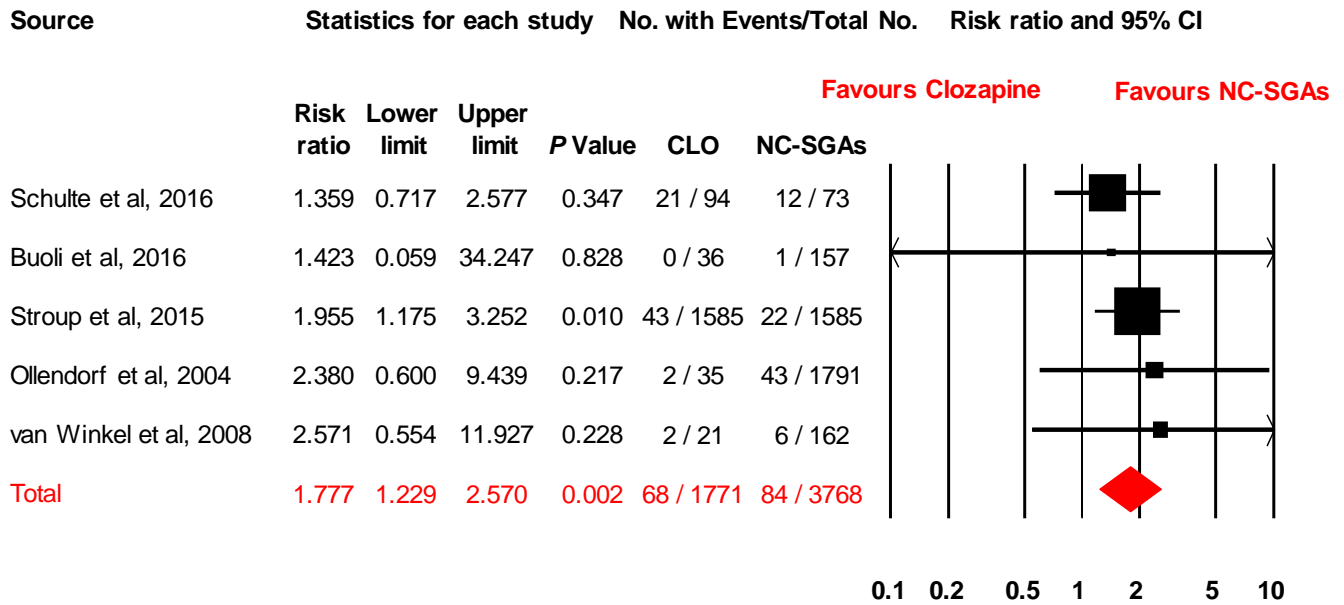

CI, confidence intervals; CLO, clozapine; NC-SGAs, non-clozapine second-generation antipsychotics

**eFigure 4-17. Forest plot of risk ratio for metabolic syndrome**

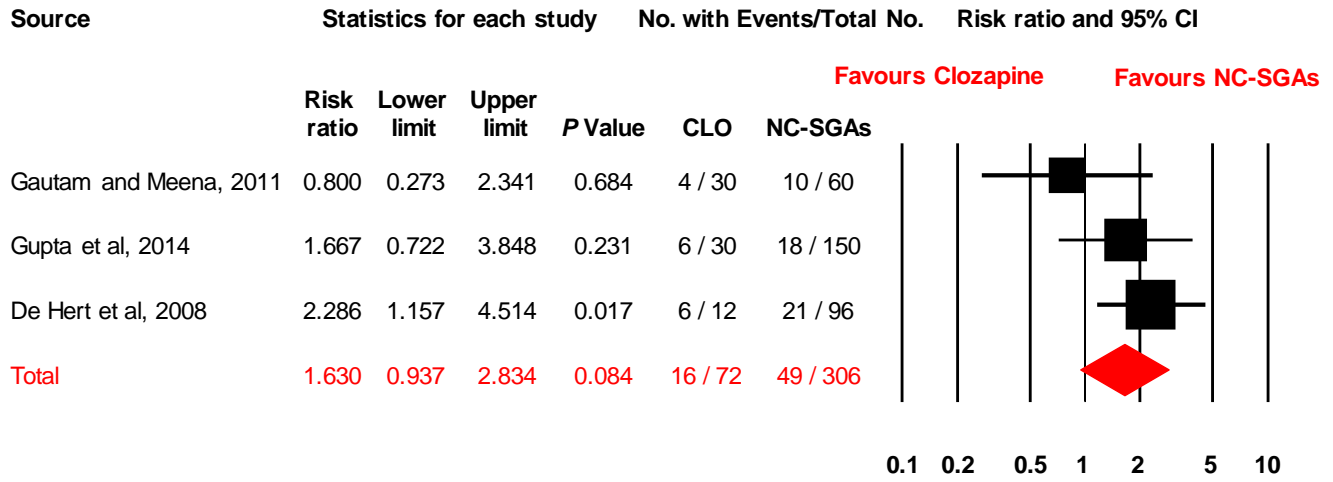

CI, confidence intervals; CLO, clozapine; NC-SGAs, non-clozapine second-generation antipsychotics

eFigure 4-18. Forest plot of standardized mean difference for body weight

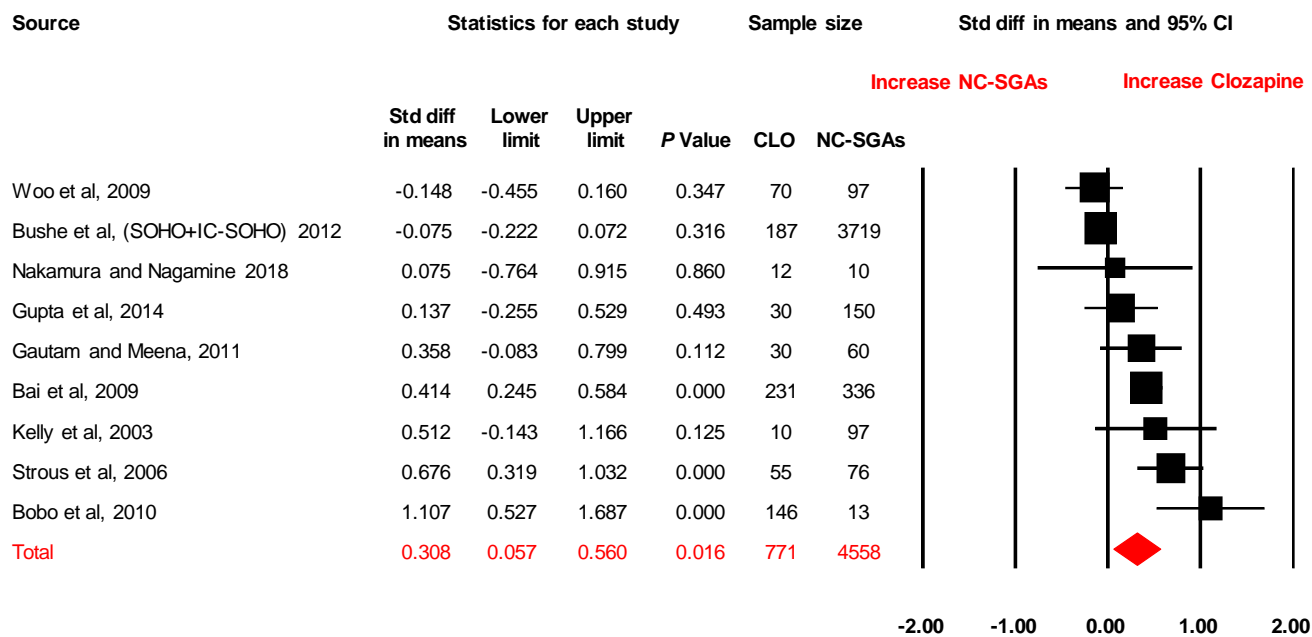

CI, confidence intervals; CLO, clozapine; NC-SGAs, non-clozapine second-generation antipsychotics; Std diff, standardized difference

eFigure 4-19. Forest plot of standardized mean difference for body mass index

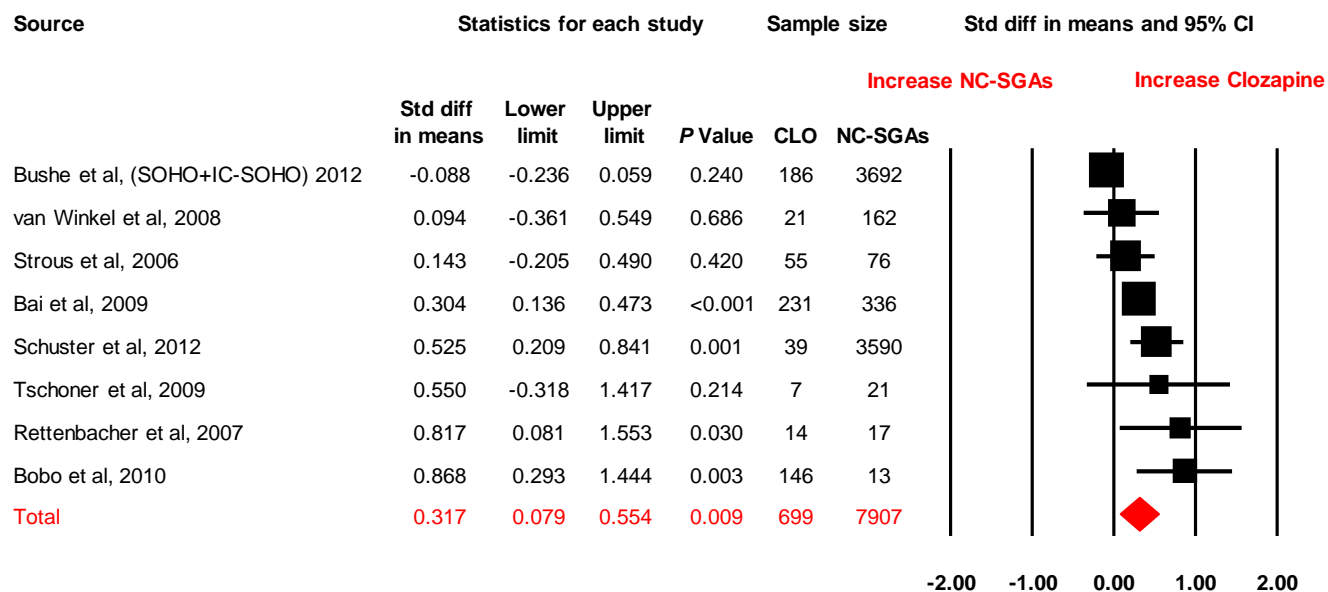

CI, confidence intervals; CLO, clozapine; NC-SGAs, non-clozapine second-generation antipsychotics; Std diff, standardized difference

eFigure 4-20. Forest plot of standardized mean difference for waist circumference

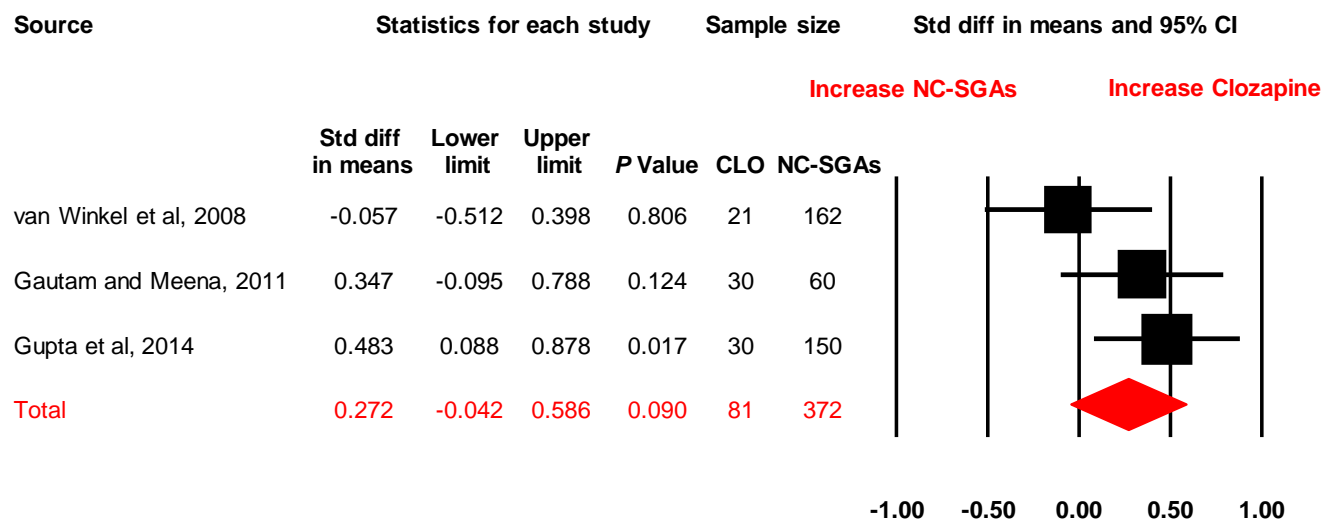

CI, confidence intervals; CLO, clozapine; NC-SGAs, non-clozapine second-generation antipsychotics; Std diff, standardized difference



eFigure 4-21. Forest plot of standardized mean difference for blood pressure (diastolic)

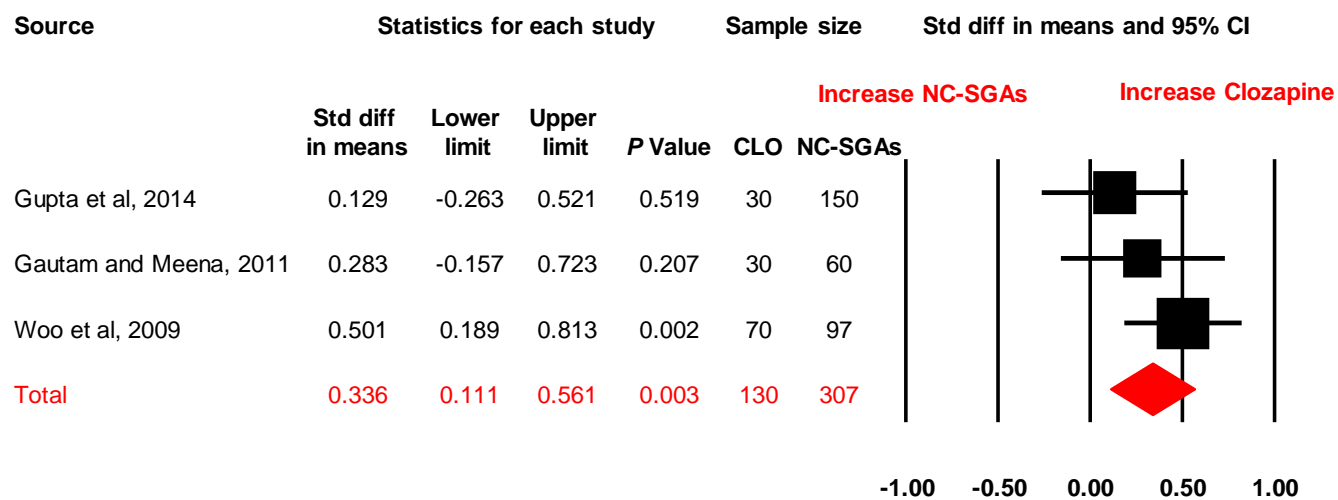

CI, confidence intervals; CLO, clozapine; NC-SGAs, non-clozapine second-generation antipsychotics; Std diff, standardized difference

eFigure 4-22. Forest plot of standardized mean difference for blood pressure (systolic)

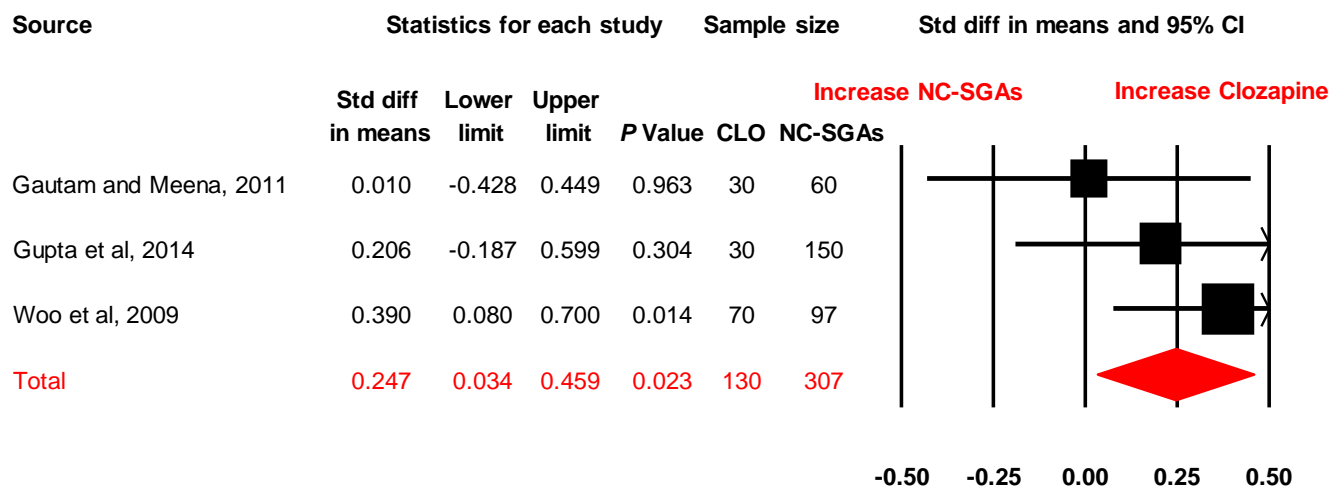

CI, confidence intervals; CLO, clozapine; NC-SGAs, non-clozapine second-generation antipsychotics; Std diff, standardized difference

eFigure 4-23. Forest plot of standardized mean difference for glucose

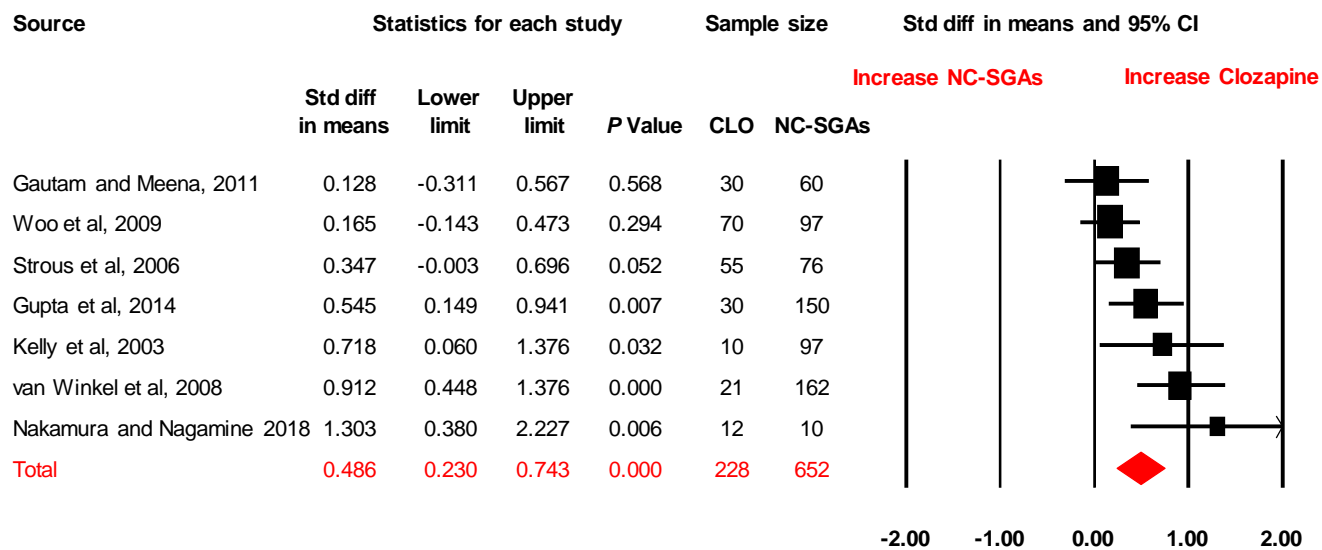

CI, confidence intervals; CLO, clozapine; NC-SGAs, non-clozapine second-generation antipsychotics; Std diff, standardized difference

eFigure 4-24. Forest plot of standardized mean difference for total cholesterol

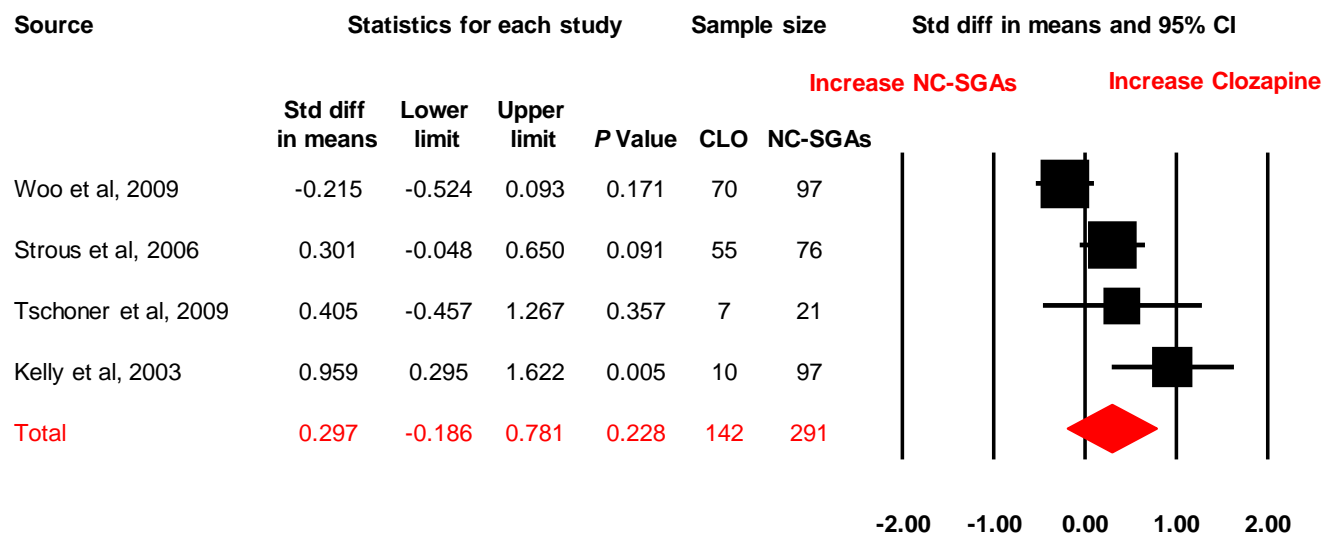

CI, confidence intervals; CLO, clozapine; NC-SGAs, non-clozapine second-generation antipsychotics; Std diff, standardized difference

eFigure 4-25. Forest plot of standardized mean difference for triglycerides

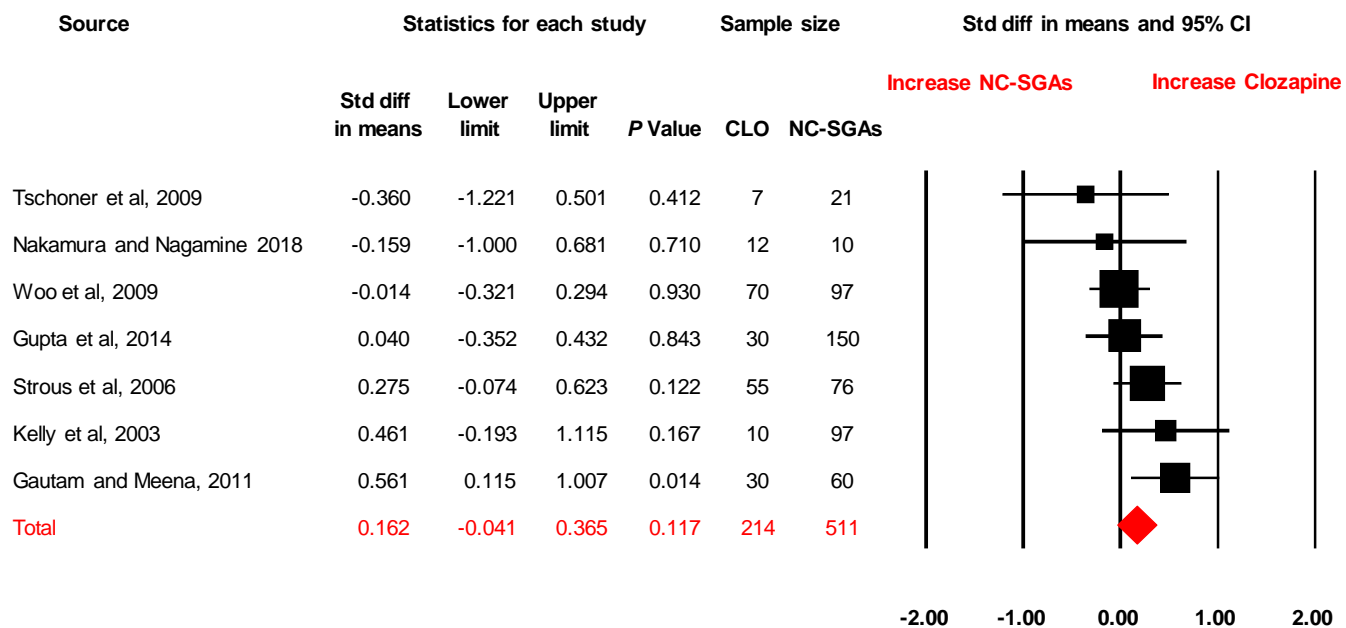

CI, confidence intervals; CLO, clozapine; NC-SGAs, non-clozapine second-generation antipsychotics; Std diff, standardized difference

**eFigure 4-26. Forest plot of standardized mean difference for insulin**

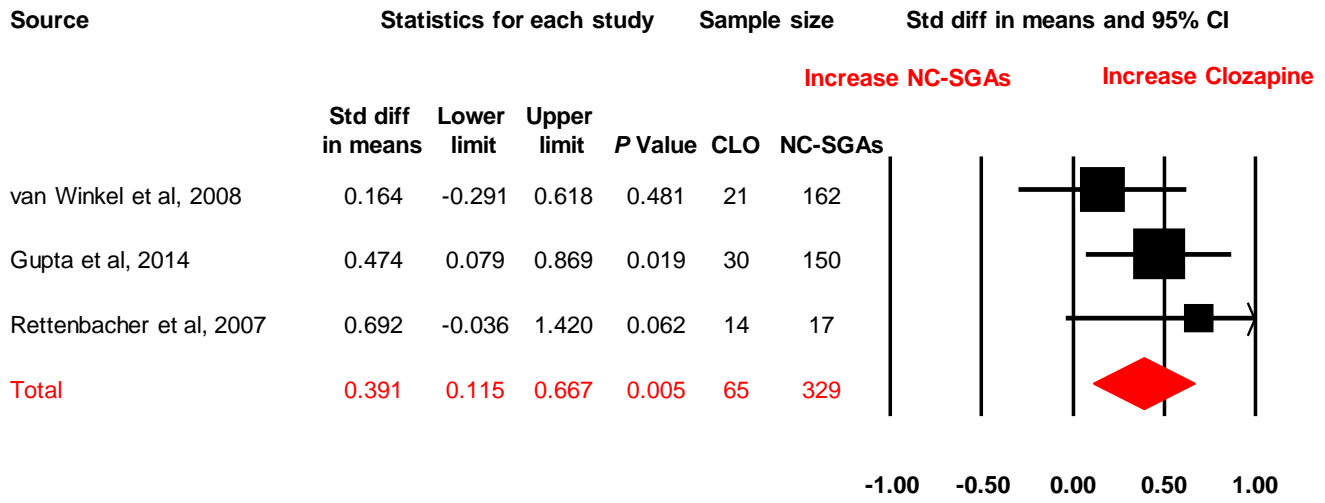

CI, confidence intervals; CLO, clozapine; NC-SGAs, non-clozapine second-generation antipsychotics; Std diff, standardized difference

eFigure 4-27. Forest plot of standardized mean difference for HOMA-IR

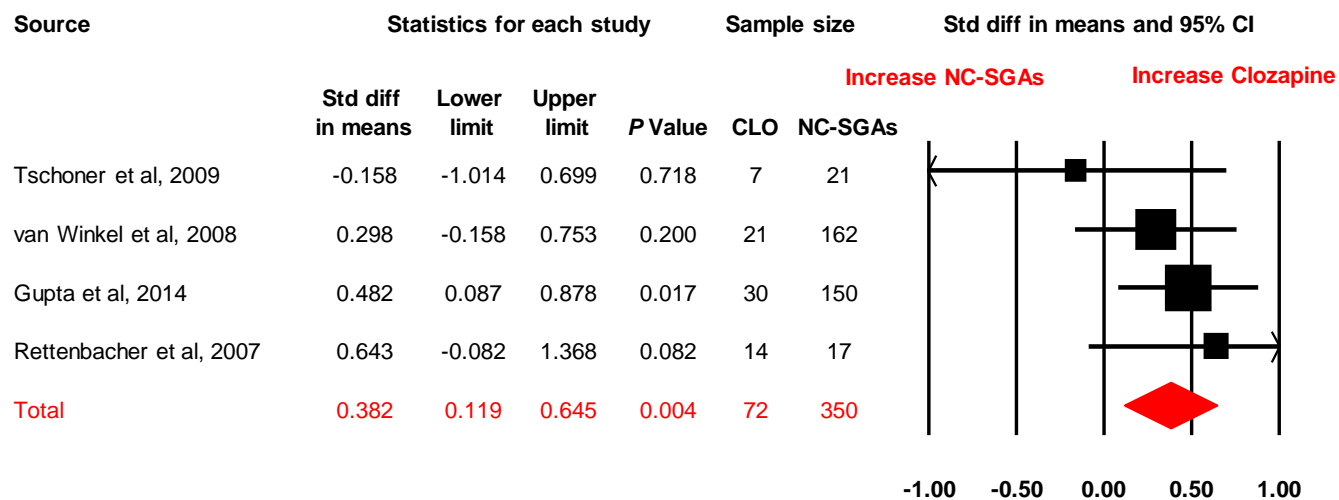

CI, confidence intervals; CLO, clozapine; HOMA-IR: homeostatic model assessment of insulin resistance; NC-SGAs, non-clozapine second-generation antipsychotics; Std diff, standardized difference

## eReference list

1. Advokat C, Dixon D, Schneider J, Comaty JE, Jr. Comparison of risperidone and olanzapine as used under "real-world" conditions in a state psychiatric hospital. *Prog Neuropsychopharmacol Biol Psychiatry*. 2004;28(3):487-495.
2. Agid O, Remington G, Kapur S, Arenovich T, Zipursky RB. Early use of clozapine for poorly responding first-episode psychosis. *J Clin Psychopharmacol*. 2007;27(4):369-373.
3. Ascher-Svanum H, Zhu B, Faries DE, Lacro JP, Dolder CR, Peng X. Adherence and persistence to typical and atypical antipsychotics in the naturalistic treatment of patients with schizophrenia. *Patient Prefer Adherence*. 2008;2:67-77.
4. Bai YM, Chen TT, Yang WS, et al. Association of adiponectin and metabolic syndrome among patients taking atypical antipsychotics for schizophrenia: a cohort study. *Schizophr Res*. 2009;111(1-3):1-8.
5. Bitter I, Czobor P, Dossenbach M, Volavka J. Effectiveness of clozapine, olanzapine, quetiapine, risperidone, and haloperidol monotherapy in reducing hostile and aggressive behavior in outpatients treated for schizophrenia: a prospective naturalistic study (IC-SOHO). *Eur Psychiatry*. 2005;20(5-6):403-408.
6. Bitter I, Treuer T, Dyachkova Y, Martenyi F, McBride M, Ungvari GS. Antipsychotic prescription patterns in outpatient settings: 24-month results from the Intercontinental Schizophrenia Outpatient Health Outcomes (IC-SOHO) study. *Eur Neuropsychopharmacol*. 2008;18(3):170-180.
7. Bitter I, Katona L, Zambori J, et al. Comparative effectiveness of depot and oral second generation antipsychotic drugs in schizophrenia: a nationwide study in Hungary. *Eur Neuropsychopharmacol*. 2013;23(11):1383-1390.
8. Bobo WV, Jayathilake K, Lee MA, Meltzer HY. Changes in weight and body mass index during treatment with melperone, clozapine and typical neuroleptics. *Psychiatry Res*. 2010;176(2-3):114-119.
9. Buoli M, Kahn RS, Serati M, Altamura AC, Cahn W. Haloperidol versus second-generation antipsychotics in the long-term treatment of schizophrenia. *Hum Psychopharmacol*. 2016;31(4):325-331.
10. Bushe CJ, Slooff CJ, Haddad PM, Karagianis JL. Weight change from 3-year observational data: findings from the worldwide schizophrenia outpatient health outcomes database. *J Clin Psychiatry*. 2012;73(6):e749-755.
11. Castro AP, Elkis H. Rehospitalization rates of patients with schizophrenia discharged on haloperidol, risperidone or clozapine. *Rev Bras Psiquiatr*. 2007;29(3):207-212.
12. Chitaia NN, Danilov DS, Tiuvina NA. [Peculiarities of neuroleptic syndrome in women treated with typical and atypical neuroleptics]. *Zh Nevrol Psikhiatr Im S S Korsakova*. 2009;109(3):37-43.
13. Conley RR, Love RC, Kelly DL, Bartko JJ. Rehospitalization rates of patients recently discharged on a regimen of risperidone or clozapine. *Am J Psychiatry*. 1999;156(6):863-868.
14. Conley RR, Kelly DL, Love RC, McMahon RP. Rehospitalization risk with second-generation and depot antipsychotics. *Ann Clin Psychiatry*. 2003;15(1):23-31.
15. Cooper D, Moisan J, Gregoire JP. Adherence to atypical antipsychotic treatment among newly treated patients: a population-based study in schizophrenia. *J Clin Psychiatry*. 2007;68(6):818-825.
16. Danilov DS. [Effect of side-effects and complications caused by atypical neuroleptics on the effectiveness of therapy in patients with schizophrenia]. *Zh Nevrol Psikhiatr Im S S Korsakova*. 2010;110(3):48-55.
17. De Hert M, Schreurs V, Sweers K, et al. Typical and atypical antipsychotics differentially affect long-term incidence rates of the metabolic syndrome in first-episode patients with schizophrenia: a retrospective chart



- review. *Schizophr Res.* 2008;101(1-3):295-303.
18. Flynn SW, MacEwan GW, Altman S, et al. An open comparison of clozapine and risperidone in treatment-resistant schizophrenia. *Pharmacopsychiatry.* 1998;31(1):25-29.
  19. Franza F, Fasano V, De Guglielmo S, Solomita B. Management of primary negative symptoms in schizophrenia: an one-year observational study. *Psychiatr Danub.* 2015;27 Suppl 1:S245-249.
  20. Gau SS, Chung CH, Gau CS. A pharmacoeconomic analysis of atypical antipsychotics and haloperidol in first-episode schizophrenic patients in taiwan. *J Clin Psychopharmacol.* 2008;28(3):271-278.
  21. Gautam S, Meena PS. Drug-emergent metabolic syndrome in patients with schizophrenia receiving atypical (second-generation) antipsychotics. *Indian J Psychiatry.* 2011;53(2):128-133.
  22. Green AI, Burgess ES, Dawson R, Zimmet SV, Strous RD. Alcohol and cannabis use in schizophrenia: effects of clozapine vs. risperidone. *Schizophr Res.* 2003;60(1):81-85.
  23. Guo X, Fang M, Zhai J, et al. Effectiveness of maintenance treatments with atypical and typical antipsychotics in stable schizophrenia with early stage: 1-year naturalistic study. *Psychopharmacology (Berl).* 2011;216(4):475-484.
  24. Gupta A, Dadheech G, Yadav D, Sharma P, Gautam S. Metabolic issues in schizophrenic patients receiving antipsychotic treatment. *Indian J Clin Biochem.* 2014;29(2):196-201.
  25. Haro JM, Edgell ET, Novick D, et al. Effectiveness of antipsychotic treatment for schizophrenia: 6-month results of the Pan-European Schizophrenia Outpatient Health Outcomes (SOHO) study. *Acta Psychiatr Scand.* 2005;111(3):220-231.
  26. Haro JM, Suarez D, Novick D, Brown J, Usall J, Naber D. Three-year antipsychotic effectiveness in the outpatient care of schizophrenia: observational versus randomized studies results. *Eur Neuropsychopharmacol.* 2007;17(4):235-244.
  27. Hennessy S, Bilker WB, Knauss JS, et al. Cardiac arrest and ventricular arrhythmia in patients taking antipsychotic drugs: cohort study using administrative data. *BMJ.* 2002;325(7372):1070.
  28. Herceg M, Jukic V, Vidovic D, et al. Two-year rehospitalization rates of patients with newly diagnosed or chronic schizophrenia on atypical or typical antipsychotic drugs: retrospective cohort study. *Croat Med J.* 2008;49(2):215-223.
  29. Hodgson R, Belgamwar R, Al-tawarah Y, MacKenzie G. The use of atypical antipsychotics in the treatment of schizophrenia in North Staffordshire. *Hum Psychopharmacol.* 2005;20(2):141-147.
  30. Huang HH, Wang YC, Wu CL, et al. TNF-alpha -308 G>A polymorphism and weight gain in patients with schizophrenia under long-term clozapine, risperidone or olanzapine treatment. *Neurosci Lett.* 2011;504(3):277-280.
  31. Innamorati M, Baratta S, Di Vittorio C, et al. Atypical antipsychotics in the treatment of depressive and psychotic symptoms in patients with chronic schizophrenia: a naturalistic study. *Schizophr Res Treatment.* 2013;2013:423205.
  32. Karagianis J, Williams R, Davis L, et al. Antipsychotic switching: results from a one-year prospective, observational study of patients with schizophrenia. *Curr Med Res Opin.* 2009;25(9):2121-2132.
  33. Karki SD, Bellnier TJ, Patil K, Oretaga T. Cost-effectiveness of atypical antipsychotics in severely and persistently mentally ill patients with schizophrenia and schizoaffective disorders. *Drug Benefit Trends.*

- 2001;13(2):7BH-15BH.
34. Kelly DL, Kreyenbuhl J, Love RC, Van-Duong Q, Conley RR. Six-month review of weight and metabolic parameters in patients receiving clozapine, risperidone, olanzapine, or quetiapine. *J Clin Psychiatry*. 2003;64(9):1133-1134.
  35. Kelly DL, McMahon RP, Liu F, et al. Cardiovascular disease mortality inpatients with chronic schizophrenia treated with clozapine: A retrospective cohort study. *J Clin Psychiatry*. 2010;71(3):304-311.
  36. Kim JH, Kim D, Marder SR. Time to rehospitalization of clozapine versus risperidone in the naturalistic treatment of comorbid alcohol use disorder and schizophrenia. *Prog Neuropsychopharmacol Biol Psychiatry*. 2008;32(4):984-988.
  37. Konrad C, Schormair C, Ophaus P, Knickelbein U, Eikelmann B. Risperidone and clozapine in treatment resistant schizophrenia. Clinical observations on psychopathology, side effects and subjective well-being. *Krankenhauspsychiatrie*. 2000;11(3):89-93.
  38. Lin CH, Lin SC, Chen MC, Wang SY. Comparison of time to rehospitalization among schizophrenic patients discharged on typical antipsychotics, clozapine or risperidone. *J Chin Med Assoc*. 2006;69(6):264-269.
  39. Lindenmayer JP, Iskander A, Park M, et al. Clinical and neurocognitive effects of clozapine and risperidone in treatment-refractory schizophrenic patients: a prospective study. *J Clin Psychiatry*. 1998;59(10):521-527.
  40. Mauri MC, Moliterno D, Rossattini M, Colasanti A. Depression in schizophrenia: comparison of first- and second-generation antipsychotic drugs. *Schizophr Res*. 2008;99(1-3):7-12.
  41. Nakamura M, Nagamine T. Metabolic Changes in Patients with Schizophrenia Switched From Olanzapine to Asenapine or Clozapine. *Innov Clin Neurosci*. 2018;15(7-8):11-12.
  42. Nikolac Perkovic M, Nedic Erjavec G, Zivkovic M, et al. Association between the brain-derived neurotrophic factor Val66Met polymorphism and therapeutic response to olanzapine in schizophrenia patients. *Psychopharmacology (Berl)*. 2014;231(18):3757-3764.
  43. Novick D, Haro JM, Bertsch J, Haddad PM. Incidence of extrapyramidal symptoms and tardive dyskinesia in schizophrenia: thirty-six-month results from the European schizophrenia outpatient health outcomes study. *J Clin Psychopharmacol*. 2010;30(5):531-540.
  44. Novick D, Ascher-Svanum H, Haro JM, Bertsch J, Takahashi M. Schizophrenia Outpatient Health Outcomes study: twelve-month findings. *Pragmat Obs Res*. 2012;3:27-40.
  45. Nyakyoma K, Morriss R. Effectiveness of clozapine use in delaying hospitalization in routine clinical practice: a 2 year observational study. *Psychopharmacol Bull*. 2010;43(2):67-81.
  46. Ollendorf DA, Joyce AT, Rucker M. Rate of new-onset diabetes among patients treated with atypical or conventional antipsychotic medications for schizophrenia. *MedGenMed*. 2004;6(1):5.
  47. Pridan S, Swartz M, Baruch Y, Tadger S, Plopski I, Barak Y. Effectiveness and safety of clozapine in elderly patients with chronic resistant schizophrenia. *Int Psychogeriatr*. 2015;27(1):131-134.
  48. Remington G, Khramov I. Health care utilization in patients with schizophrenia maintained on atypical versus conventional antipsychotics. *Prog Neuropsychopharmacol Biol Psychiatry*. 2001;25(2):363-369.
  49. Rettenbacher MA, Hummer M, Hofer A, et al. Alterations of glucose metabolism during treatment with clozapine or amisulpride: results from a prospective 16-week study. *J Psychopharmacol*. 2007;21(4):400-404.
  50. Ringback Weitoft G, Berglund M, Lindstrom EA, Nilsson M, Salmi P, Rosen M. Mortality, attempted suicide, re-

- hospitalisation and prescription refill for clozapine and other antipsychotics in Sweden—a register-based study. *Pharmacoepidemiol Drug Saf.* 2014;23(3):290-298.
51. Schulte PF, Bocxe JT, Doodeman HJ, van Haelst IM, Cohen D. Risk of New-Onset Diabetes After Long-Term Treatment With Clozapine in Comparison to Other Antipsychotics in Patients With Schizophrenia. *J Clin Psychopharmacol.* 2016;36(2):115-119.
  52. Schuster JP, Raucher-Chene D, Lemogne C, et al. Impact of switching or initiating antipsychotic treatment on body weight during a 6-month follow-up in a cohort of patients with schizophrenia. *J Clin Psychopharmacol.* 2012;32(5):672-677.
  53. Sharma T, Hughes C, Soni W, Kumari V. Cognitive effects of olanzapine and clozapine treatment in chronic schizophrenia. *Psychopharmacology (Berl).* 2003;169(3-4):398-403.
  54. Shermock K, Sadik M, Kozma C, Sesti A, Reeder C. Risperidone, haloperidol and clozapine in the South Carolina medicaid program: a comparative analysis of utilisation and expenditure. *Disease Management & Health Outcomes.* 2001;9(4):203-213 211p.
  55. Stip E, Lussier I, Ngan E, Mendrek A, Liddle P. Discriminant cognitive factors in responder and non-responder patients with schizophrenia. *Eur Psychiatry.* 1999;14(8):442-450.
  56. Stroup TS, Gerhard T, Crystal S, Huang C, Olfson M. Comparative Effectiveness of Clozapine and Standard Antipsychotic Treatment in Adults With Schizophrenia. *Am J Psychiatry.* 2016;173(2):166-173.
  57. Strous RD, Kupchik M, Roitman S, et al. Comparison between risperidone, olanzapine, and clozapine in the management of chronic schizophrenia: a naturalistic prospective 12-week observational study. *Hum Psychopharmacol.* 2006;21(4):235-243.
  58. Taylor D, Hayhurst K, Kerwin R. A controlled, mirror-image study of second-generation antipsychotics in the treatment of schizophrenia. *Int Clin Psychopharmacol.* 2007;22(3):133-136.
  59. Taylor M, Shajahan P, Lawrie SM. Comparing the use and discontinuation of antipsychotics in clinical practice: an observational study. *J Clin Psychiatry.* 2008;69(2):240-245.
  60. Tiihonen J, Wahlbeck K, Lonnqvist J, et al. Effectiveness of antipsychotic treatments in a nationwide cohort of patients in community care after first hospitalisation due to schizophrenia and schizoaffective disorder: observational follow-up study. *BMJ.* 2006;333(7561):224.
  61. Treuer T, Martenyi F, Saylan M, Dyachkova Y. Factors associated with achieving minimally symptomatic status by patients with schizophrenia: results from the 3-year intercontinental schizophrenia outpatients health outcomes study. *Int J Clin Pract.* 2010;64(6):697-706.
  62. Tschoner A, Engl J, Rettenbacher M, et al. Effects of six second generation antipsychotics on body weight and metabolism: Risk assessment and results from a prospective study. *Pharmacopsychiatry.* 2009;42(1):29-34.
  63. van Winkel R, De Hert M, Wampers M, et al. Major changes in glucose metabolism, including new-onset diabetes, within 3 month after initiation of or switch to atypical antipsychotic medication in patients with schizophrenia and schizoaffective disorder. *J Clin Psychiatry.* 2008;69(3):472-479.
  64. Vanasse A, Blais L, Courteau J, et al. Comparative effectiveness and safety of antipsychotic drugs in schizophrenia treatment: a real-world observational study. *Acta Psychiatr Scand.* 2016.
  65. Velligan DI, Carroll C, Lage MJ, Fairman K. Outcomes of medicaid beneficiaries with schizophrenia receiving clozapine only or antipsychotic combinations. *Psychiatr Serv.* 2015;66(2):127-133.

66. Werneck AP, Hallak JC, Nakano E, Elkis H. Time to rehospitalization in patients with schizophrenia discharged on first generation antipsychotics, non-clozapine second generation antipsychotics, or clozapine. *Psychiatry Res.* 2011;188(3):315-319.
67. Williams R, Kopala L, Malla A, Smith G, Love L, Balshaw R. Medication decisions and clinical outcomes in the Canadian National Outcomes Measurement Study in Schizophrenia. *Acta Psychiatr Scand Suppl.* 2006(430):12-21.
68. Woo YS, Kim W, Chae JH, Yoon BH, Bahk WM. Blood pressure changes during clozapine or olanzapine treatment in Korean schizophrenic patients. *World J Biol Psychiatry.* 2009;10(4 Pt 2):420-425.
